# Supplementary material for: Sociodemographic differences in patient experience with primary care during COVID-19: results from a cross-sectional survey in Ontario, Canada
Source: PubMed Central journal article supplement — BMJ Open. 2022 May 9;12(5):e056868. doi: 10.1136/bmjopen-2021-056868 (PMC9086266; doi:10.1136/bmjopen-2021-056868), 2022-05-09
Supplement: bmjopen-2021-056868.draft_revisions.pdf [file bmjopen-2021-056868.draft_revisions.pdf]

# BMJ Open

BMJ Open is committed to open peer review. As part of this commitment we make the peer review history of every article we publish publicly available.

When an article is published we post the peer reviewers' comments and the authors' responses online. We also post the versions of the paper that were used during peer review. These are the versions that the peer review comments apply to.

The versions of the paper that follow are the versions that were submitted during the peer review process. They are not the versions of record or the final published versions. They should not be cited or distributed as the published version of this manuscript.

BMJ Open is an open access journal and the full, final, typeset and author-corrected version of record of the manuscript is available on our site with no access controls, subscription charges or pay-per-view fees (<http://bmjopen.bmj.com>).

If you have any questions on BMJ Open's open peer review process please email [info.bmjopen@bmj.com](mailto:info.bmjopen@bmj.com)

# BMJ Open

## Sociodemographic differences in patient experience with virtual care during COVID-19

|                               |                                                                                                                                                                                                                                                                                                                                                                                                                                                                                                                                                                                                                                                                                                                                                                                                                                                                                                                                                                                                                                                                                                                                                                                                                                                                                                                                                                                                                                                                                                                                                                                                                                                                                                                                                                                                                                                                                                                                                                                                                |
|-------------------------------|----------------------------------------------------------------------------------------------------------------------------------------------------------------------------------------------------------------------------------------------------------------------------------------------------------------------------------------------------------------------------------------------------------------------------------------------------------------------------------------------------------------------------------------------------------------------------------------------------------------------------------------------------------------------------------------------------------------------------------------------------------------------------------------------------------------------------------------------------------------------------------------------------------------------------------------------------------------------------------------------------------------------------------------------------------------------------------------------------------------------------------------------------------------------------------------------------------------------------------------------------------------------------------------------------------------------------------------------------------------------------------------------------------------------------------------------------------------------------------------------------------------------------------------------------------------------------------------------------------------------------------------------------------------------------------------------------------------------------------------------------------------------------------------------------------------------------------------------------------------------------------------------------------------------------------------------------------------------------------------------------------------|
| Journal:                      | <i>BMJ Open</i>                                                                                                                                                                                                                                                                                                                                                                                                                                                                                                                                                                                                                                                                                                                                                                                                                                                                                                                                                                                                                                                                                                                                                                                                                                                                                                                                                                                                                                                                                                                                                                                                                                                                                                                                                                                                                                                                                                                                                                                                |
| Manuscript ID                 | bmjopen-2021-056868                                                                                                                                                                                                                                                                                                                                                                                                                                                                                                                                                                                                                                                                                                                                                                                                                                                                                                                                                                                                                                                                                                                                                                                                                                                                                                                                                                                                                                                                                                                                                                                                                                                                                                                                                                                                                                                                                                                                                                                            |
| Article Type:                 | Original research                                                                                                                                                                                                                                                                                                                                                                                                                                                                                                                                                                                                                                                                                                                                                                                                                                                                                                                                                                                                                                                                                                                                                                                                                                                                                                                                                                                                                                                                                                                                                                                                                                                                                                                                                                                                                                                                                                                                                                                              |
| Date Submitted by the Author: | 30-Aug-2021                                                                                                                                                                                                                                                                                                                                                                                                                                                                                                                                                                                                                                                                                                                                                                                                                                                                                                                                                                                                                                                                                                                                                                                                                                                                                                                                                                                                                                                                                                                                                                                                                                                                                                                                                                                                                                                                                                                                                                                                    |
| Complete List of Authors:     | <p>Agarwal, Payal; Women's College Hospital Institute for Health System Solutions and Virtual Care; University of Toronto Department of Family and Community Medicine</p> <p>Wang, Ri; St Michael's Hospital, MAP Centre for Urban Health Solutions</p> <p>Meaney, Christopher; University of Toronto Temerty Faculty of Medicine, Department of Family and Community Medicine</p> <p>Walji, Sakina; University of Toronto Department of Family and Community Medicine; Mount Sinai Academic Family Health Team</p> <p>Damji, Ali; University of Toronto Department of Family and Community Medicine; Credit Valley Family Health Team</p> <p>Gill, Navsheer; Southlake Regional Health Centre; University of Toronto Department of Family and Community Medicine</p> <p>Yip, Gina; University of Toronto Department of Family and Community Medicine; Markham Stouffville Hospital</p> <p>Elman, Debbie; University of Toronto Department of Family and Community Medicine; Sunnybrook Health Sciences Centre, Department of Family and Community Medicine</p> <p>Florindo, Tiffany; University of Toronto, Department of Family and Community Medicine; North York General Hospital</p> <p>Fung, Susanna; University of Toronto, Department of Family and Community Medicine; Scarborough Health Network</p> <p>Witty, Melissa; University of Toronto, Department of Family and Community Medicine; Barrie and Community Family Health Team</p> <p>Pham, Thuy-Nga; University of Toronto, Department of Family and Community Medicine; Toronto East Health Network Michael Garron Hospital</p> <p>Ramji, Noor; University of Toronto, Department of Family and Community Medicine; St Michael's Hospital Department of Family and Community Medicine and St Michael's Academic Family Health Team</p> <p>Kiran, Tara; University of Toronto, Department of Family and Community Medicine; St Michael's Hospital Department of Family and Community Medicine and St Michael's Academic Family Health Team</p> |
| Keywords:                     | COVID-19, PRIMARY CARE, Quality in health care < HEALTH SERVICES ADMINISTRATION & MANAGEMENT                                                                                                                                                                                                                                                                                                                                                                                                                                                                                                                                                                                                                                                                                                                                                                                                                                                                                                                                                                                                                                                                                                                                                                                                                                                                                                                                                                                                                                                                                                                                                                                                                                                                                                                                                                                                                                                                                                                   |
|                               |                                                                                                                                                                                                                                                                                                                                                                                                                                                                                                                                                                                                                                                                                                                                                                                                                                                                                                                                                                                                                                                                                                                                                                                                                                                                                                                                                                                                                                                                                                                                                                                                                                                                                                                                                                                                                                                                                                                                                                                                                |

1  
2  
3  
4  
5  
6  
7  
8  
9  
10  
11  
12  
13  
14  
15  
16  
17  
18  
19  
20  
21  
22  
23  
24  
25  
26  
27  
28  
29  
30  
31  
32  
33  
34  
35  
36  
37  
38  
39  
40  
41  
42  
43  
44  
45  
46  
47  
48  
49  
50  
51  
52  
53  
54  
55  
56  
57  
58  
59  
60

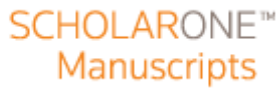

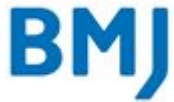

I, the Submitting Author has the right to grant and does grant on behalf of all authors of the Work (as defined in the below author licence), an exclusive licence and/or a non-exclusive licence for contributions from authors who are: i) UK Crown employees; ii) where BMJ has agreed a CC-BY licence shall apply, and/or iii) in accordance with the terms applicable for US Federal Government officers or employees acting as part of their official duties; on a worldwide, perpetual, irrevocable, royalty-free basis to BMJ Publishing Group Ltd ("BMJ") its licensees and where the relevant Journal is co-owned by BMJ to the co-owners of the Journal, to publish the Work in this journal and any other BMJ products and to exploit all rights, as set out in our [licence](#).

The Submitting Author accepts and understands that any supply made under these terms is made by BMJ to the Submitting Author unless you are acting as an employee on behalf of your employer or a postgraduate student of an affiliated institution which is paying any applicable article publishing charge ("APC") for Open Access articles. Where the Submitting Author wishes to make the Work available on an Open Access basis (and intends to pay the relevant APC), the terms of reuse of such Open Access shall be governed by a Creative Commons licence – details of these licences and which [Creative Commons](#) licence will apply to this Work are set out in our licence referred to above.

Other than as permitted in any relevant BMJ Author's Self Archiving Policies, I confirm this Work has not been accepted for publication elsewhere, is not being considered for publication elsewhere and does not duplicate material already published. I confirm all authors consent to publication of this Work and authorise the granting of this licence.

## Sociodemographic differences in patient experience with virtual care during COVID-19

Payal Agarwal<sup>1,2</sup> MD [payal.agarwal@wchospital.ca](mailto:payal.agarwal@wchospital.ca)

Ri (Rick) Wang<sup>3</sup> MMath [ri.wang@unityhealth.to](mailto:ri.wang@unityhealth.to)

Christopher Meaney<sup>1</sup> MSc [christopher.meaney@utoronto.ca](mailto:christopher.meaney@utoronto.ca)

Sakina Walji<sup>1</sup> MD [sakina.walji@sinaihealth.ca](mailto:sakina.walji@sinaihealth.ca)

Ali Damji<sup>1</sup> MD [ali.damji@mail.utoronto.ca](mailto:ali.damji@mail.utoronto.ca)

Navsheer Gill Toor<sup>1</sup> MD [NToor@southlakeregional.org](mailto:NToor@southlakeregional.org)

Gina Yip<sup>1</sup> MD [gina.yip@gmail.com](mailto:gina.yip@gmail.com)

Debbie Elman<sup>1</sup> MD [Debbie.Elman@sunnybrook.ca](mailto:Debbie.Elman@sunnybrook.ca)

Tiffany Florindo<sup>1</sup> MD [tiffany.florindo@medportal.ca](mailto:tiffany.florindo@medportal.ca)

Susanna Fung<sup>1</sup> MD [susannaf@gmail.com](mailto:susannaf@gmail.com)

Melissa Witty<sup>1</sup> MD [wittym65@gmail.com](mailto:wittym65@gmail.com)

Thuy Nga Pham<sup>1</sup> MD [thuynga.pham@utoronto.ca](mailto:thuynga.pham@utoronto.ca)

Noor Ramji<sup>1,4</sup> MD [noor.ramji@unityhealth.to](mailto:noor.ramji@unityhealth.to)

Tara Kiran<sup>1,3,4,5</sup> MD, MSc [tara.kiran@utoronto.ca](mailto:tara.kiran@utoronto.ca)

<sup>1</sup>Department of Family and Community Medicine, Temerty Faculty of Medicine, University of Toronto, Toronto, Ontario, Canada

1  
2  
3 <sup>2</sup>Women's College Hospital Institute for Health System Solutions and Virtual Care, Women's  
4 College Hospital, Toronto, Ontario, Canada  
5

6  
7 <sup>3</sup>MAP Centre for Urban Health Solutions, Li Ka Shing Knowledge Institute, St. Michael's  
8 Hospital, Toronto, Canada  
9

10  
11 <sup>4</sup>Department of Family and Community Medicine, St. Michael's Hospital, Toronto, Ontario,  
12 Canada

13  
14 <sup>5</sup>Institute of Health Policy, Management and Evaluation, University of Toronto, Toronto,  
15 Ontario, Canada  
16  
17  
18

19 **Corresponding author:**

20 Tara Kiran, MD, MSc, MAP Centre for Urban Health Solutions, St. Michael's Hospital, Unity  
21 Health Toronto, 30 Bond St., Toronto, ON Canada M5B 1W8  
22 [tara.kiran@utoronto.ca](mailto:tara.kiran@utoronto.ca), phone 416-864-3011, fax 416-864-3099  
23  
24

25 Manuscript Word Count: 2477

26 Number of Tables: 5

27 Number of Figures: 0

28 Number of Appendices: 2  
29  
30  
31  
32  
33  
34  
35  
36  
37  
38  
39  
40  
41  
42  
43  
44  
45  
46  
47  
48  
49  
50  
51  
52  
53  
54  
55  
56  
57  
58  
59  
60

1  
2  
3  
4  
5  
6  
7  
8  
9  
10  
11  
12  
13  
14  
15  
16  
17  
18  
19  
20  
21  
22  
23  
24  
25  
26  
27  
28  
29  
30  
31  
32  
33  
34  
35  
36  
37  
38  
39  
40  
41  
42  
43  
44  
45  
46  
47  
48  
49  
50  
51  
52  
53  
54  
55  
56  
57  
58  
59  
60

For peer review only

## ABSTRACT

**Purpose:** We sought to understand patients' care-seeking behaviours during the pandemic, their use and views of different virtual care modalities, and whether these differed by sociodemographic factors.

1  
2  
3  
4 **Methods:** We conducted a multi-site cross-sectional patient experience survey at thirteen  
5  
6  
7 academic primary care teaching practices between May and June of 2020. An anonymized link  
8  
9  
10 to an electronic survey was sent to a subset of patients with a valid email address on file;  
11  
12  
13 sampling was based on birth month. For each question, the proportion of respondents who  
14  
15  
16 selected each response was calculated, followed by a comparison by sociodemographic  
17  
18  
19 characteristics using chi-squared tests.  
20  
21

22  
23  
24 **Results:** In total, 7482 participants responded to the survey. Most received care from their  
25  
26  
27 primary care clinic during the pandemic (67.7%, 5068/7482), the majority via phone (82.5%,  
28  
29  
30 4195/5086). Among those who received care, 30.53% (1509/4943) stated that they delayed  
31  
32  
33 seeking care because of the pandemic. Most participants reported a high degree of comfort with  
34  
35  
36 phone (92.4%, 3824/4139), video (95.2%, 238/250) and email or messaging (91.3%, 794/870).  
37  
38  
39 However, those reporting difficulty making ends meet, poor or fair health, and arriving in  
40  
41  
42 Canada in the last 10 years reported lower levels of comfort with virtual care and fewer wanted  
43  
44  
45 their practice to continue offering virtual options after the pandemic.  
46  
47  
48

49  
50 **Conclusions:** Our study suggest that newcomers, people living with a lower income, and those  
51  
52  
53 reporting poor or fair health have a stronger preference and comfort for in-person primary care.  
54  
55  
56



1  
2  
3  
4 Further research should explore potential barriers to virtual care and how these could be  
5  
6  
7 addressed.  
8  
9

#### 10 **Strengths and Limitations of this study:**

- 13 • Our study included a large sample of respondents from multiple clinics across both urban  
14  
15 and suburban communities; however, all clinics were academic practices within the  
16  
17 Greater Toronto Area which may limit generalizability of findings  
18  
19  
20  
21  
22
- 23 • Patients were randomly sampled using birth month; however, our findings are open to  
24  
25 selection bias because of the response rate, mode of delivery (email), and the survey  
26  
27 being offered primarily in English  
28  
29  
30  
31
- 32 • Demographics of our sample confirm that we reached a diverse group of patients  
33  
34  
35
- 36 • Survey questions were relevant to COVID-19 and informed by primary care leaders and  
37  
38 patients  
39  
40  
41
- 42 • Our survey reports on experience during the early phase of the pandemic and patients'  
43  
44 comfort and preferences may have evolved since  
45  
46  
47  
48  
49  
50  
51  
52  
53  
54  
55  
56  
57  
58  
59  
60

## INTRODUCTION

The COVID-19 pandemic has dramatically shifted the way health care is delivered and experienced by patients. Primary care practices in Canada, the US and elsewhere, rapidly switched to a virtual first approach in the first wave of the pandemic to limit transmission of the SARS-CoV2 virus and conserve Personal Protective Equipment<sup>1</sup>. A study from Ontario found that shortly after the pandemic was declared, in-office visits reduced by 79% and virtual care increased 56-fold, comprising 71% of primary care physician visits<sup>2</sup>. While this approach supported immediate public health goals, its impact on access, receipt of patient centered evidence-based care, and longer -term health outcomes is unclear<sup>3</sup>. As health systems consider what the “new normal” should look like, an examination of these impacts will be crucial.

This shift to a virtual-first approach in primary care has raised several concerns. Clinicians have noted anecdotally that patients with worrisome symptoms are delaying care<sup>4</sup>. Some note that the switch to virtual care may make care more accessible<sup>5-8</sup> , while others have highlighted barriers certain populations face in accessing virtual care<sup>9-12</sup>. Prior studies suggest patient characteristics including older age and lower income may limit one’s ability to benefit from digital health and

1  
2  
3 virtual care services<sup>13-14</sup>. In addition, patients may not have access to required technologies such  
4  
5  
6  
7 as a phone or internet access<sup>15-16</sup>. Despite this, very little literature to date is available on patient  
8  
9  
10 experience during the COVID-19 pandemic and how these differ by sociodemographic  
11  
12  
13 characteristics. Most existing studies on patient experience during COVID-19 are from acute  
14  
15  
16 care, and do not stratify experience based on patient demographics<sup>17-21</sup>.  
17  
18  
19  
20  
21  
22  
23

24 We conducted a patient survey at multiple academic primary care clinics in Ontario, Canada to  
25  
26  
27 better understand patient experience during COVID-19. We were interested in patients' care-  
28  
29  
30 seeking behaviours, their use and views of different virtual care modalities, and whether these  
31  
32  
33 differed by sociodemographic factors.  
34  
35  
36  
37  
38  
39  
40

## 41 **METHODS**

### 42 **Study design and setting**

43  
44  
45 We conducted a multi-site cross-sectional survey to understand patient experience during the  
46  
47  
48 COVID-19 pandemic at thirteen core teaching practices affiliated with the University of Toronto  
49  
50  
51  
52  
53  
54 Department of Family and Community Medicine situated in the Greater Toronto Area, Canada's  
55  
56  
57  
58  
59  
60

1  
2  
3 largest metropolitan area. Participating practices were located in Toronto and surrounding areas  
4  
5  
6 including Mississauga, Markham, and Barrie. Practices range in size from roughly 11 physicians  
7  
8  
9 serving 14,000 patients to 80 physicians serving 50,000 patients; some have multiple locations.  
10  
11

12  
13 Physicians in all teaching practices are part of Family Health Organizations and formally enroll  
14  
15 patients, have shared responsibility for after-hours care, and are paid primarily by age-sex  
16  
17  
18 adjusted capitation; twelve of the thirteen sites were part of Family Health Teams that included  
19  
20  
21 non-physician health professionals such as nurses, nurse practitioners, social workers and  
22  
23  
24  
25  
26  
27 dieticians.  
28  
29  
30  
31  
32

33  
34 The survey was developed to directly inform quality improvement (QI) efforts at participating  
35  
36  
37 sites during COVID-19.  
38  
39  
40

### 41 42 **Study Population and Recruitment** 43 44

45 A link to an open electronic patient experience survey is emailed every quarter to a subset of  
46  
47  
48 patients with a valid email address on file; sampling each quarter is based on birth month with all  
49  
50  
51 eligible patients receiving a survey in a given year. The current analysis focuses on patients who  
52  
53  
54  
55 were sent the survey between May and June of 2020 because they had a birthday during the  
56  
57  
58  
59  
60

1  
2  
3 months of March, April or May of 2020. Each site distributed an anonymized link to patients in  
4  
5  
6 the manner by which they usually communicate electronically to patients (i.e. by email or using a  
7  
8  
9 secure messaging service). In some cases, the email address on file may belong to a family  
10  
11  
12 member or caregiver to allow them the option of filling out the survey on behalf of the patient.  
13  
14  
15 Recruitment was done in English, with one site also doing recruitment and survey completion in  
16  
17  
18 French. No incentives were provided to participants.  
19  
20  
21  
22  
23  
24  
25  
26

### 27 **Survey Design**

28  
29  
30 The survey was developed collaboratively by the family physicians who had a QI leadership role  
31  
32  
33 at participating sites. Where possible, questions were informed by existing surveys including  
34  
35  
36 the Commonwealth Fund International Health Policy Survey<sup>22-23</sup> and the Ontario Primary Care  
37  
38  
39 Experience Survey, which was developed as part of a larger Primary Care Performance  
40  
41  
42 Measurement strategy to measure the performance across 9 domains<sup>24-25</sup>. The survey went  
43  
44  
45 through several iterations based on feedback from practice QI teams, a survey methodologist, a  
46  
47  
48 biostatistician, patient education and engagement specialists, and patient and family advisors. A  
49  
50  
51 paragraph at the start of the survey outlined the purpose of the survey, the reason they were being  
52  
53  
54  
55  
56  
57  
58  
59  
60

1  
2  
3 asked to participate, and highlighted that the survey was voluntary and anonymous. The final  
4  
5  
6  
7 survey was prepared in Qualtrics software, a digital platform to capture experience data, and  
8  
9  
10 included 43 potential questions over 5 thematic domains including: 1) seeking and delaying care,  
11  
12  
13 2) use and comfort with virtual care, 3) urgent care access, 4) patient centeredness and 5) patient  
14  
15  
16 demographic and contextual factors. Participants could end the survey at any point and were able  
17  
18  
19 to review previously answered questions before submission. (See Supplementary file 1 for full  
20  
21  
22  
23 survey)  
24  
25  
26  
27

### 28 **Data Collection and Storage**

29  
30  
31 Data collected via the electronic survey were stored on Qualtrics. All data was downloaded onto  
32  
33  
34 a secure research server at the University of Toronto. A script was run to remove any potentially  
35  
36  
37 identifying information including 1) IP addresses, 2) Email address, 3) longitude/latitude  
38  
39  
40 coordinates and 4) any free text fields (which may contain unstructured protected health  
41  
42  
43 information).  
44  
45  
46  
47  
48  
49  
50  
51

### 52 **Statistical Analysis**

1  
2  
3  
4 We performed an initial descriptive statistics analysis on the responses of all participants across  
5  
6  
7 all sites who answered at least one question in the survey. For each question, we calculated the  
8  
9  
10 proportion of respondents who selected each response. We then compared patient responses by  
11  
12  
13 sociodemographic characteristics including age, gender, education, self-reported financial issues,  
14  
15  
16 immigration status, primary language, self-reported health, and usual primary care provider  
17  
18  
19 (PCP). P values were calculated using chi-squared tests and all data analysis was conducted  
20  
21  
22  
23 using R version 4.0.  
24  
25  
26  
27  
28  
29

### 30 **Patient and Public Involvement**

31  
32  
33 Patients and families at participating clinic sites informed the survey questions and methods and  
34  
35  
36  
37 have been engaged in discussions about the results and potential next steps.  
38  
39  
40  
41  
42  
43

## 44 **RESULTS**

45  
46  
47 The survey link was emailed to 32,307 patients at 13 practices (see Supplementary file 2). We  
48  
49  
50 presented sociodemographic data (Table 1) on the 7482 participants who answered one or more  
51  
52  
53  
54 questions in the survey (23.3% response rate). Sixty-five percent of respondents were female  
55  
56  
57  
58  
59  
60

1  
2  
3  
4 (4379/6713) and 78.3% (5159/6588) reported having a college, university or graduate degree.  
5  
6

7 Nine percent of respondents (590/6556) reported trouble making ends meet at the end of the  
8  
9  
10 month, while 29.0% (1928/6656) were not born in Canada (with 16.9% of these having arrived  
11  
12  
13 in the last 10 years). Eight percent (553/6851) reported filling out the survey on behalf of a  
14  
15  
16 family member. Fifty-five surveys were completed in French.  
17  
18  
19  
20  
21  
22  
23

#### 24 **Care-seeking during COVID-19**

25  
26  
27 Of all respondents, 67.7% (5068/7482) reported they received care in some way from their  
28  
29  
30 primary care clinic since the start of the pandemic. Financial status and self-reported health were  
31  
32  
33 significantly associated with care seeking behaviours during the pandemic ( $p < 0.001$ ); a higher  
34  
35  
36 proportion of patients who noted trouble making ends meet (yes: 74.8%, 441/590, no: 65.3%,  
37  
38  
39 3396/5201, prefer not to answer: 68.0%, 520/765) and those with lower self-rated health (fair or  
40  
41  
42 poor: 76.9%, 752/978, excellent: 59.8%, 599/1002) reported receiving care during the study  
43  
44  
45 period. Of the 32.3% (2414/7482) of patients who did not receive care during the study period,  
46  
47  
48 the most commonly cited reasons were that patients had no health need (72.4%) and patients  
49  
50  
51 were worried about safety (9.5%).  
52  
53  
54  
55  
56  
57  
58  
59  
60



1  
2  
3  
4  
5  
6  
7 Of the 5068 patients who reported receiving care at their primary care practice during the  
8  
9  
10 pandemic, 30.5% (1509/4943) stated that they delayed seeking care because of the pandemic.  
11

12  
13 Gender, age, education level, financial status and self-reported health status were significantly  
14  
15 associated with differences in seeking care ( $p < 0.05$  for all); for example, a higher proportion of  
16  
17 those with trouble making ends meet and those with lower self-rated health reported delays in  
18  
19 seeking care (see Table 2).  
20  
21  
22  
23  
24  
25  
26  
27  
28  
29

### 30 **Use and perceptions of virtual care**

31  
32  
33 Eighty-two (4195/5086) percent of participants reported receiving care by phone, 30.5%  
34  
35 (1553/5086) in-person, 17.4% (886/5086) via email or secure messaging, and 5.1% (260/5086)  
36  
37 via video. Age, immigration status and self-rated health were significantly associated with  
38  
39 differences in receiving in person care ( $p < 0.05$  for all); the proportion who reported receiving in-  
40  
41 person care was lower among those over the age of 65, those not born in Canada and those with  
42  
43 lower self-rated health (Table 3). Women, young adults, those who rate their health as fair or  
44  
45 poor and those who reported trouble making ends meet reported higher rates of phone use (see  
46  
47  
48  
49  
50  
51  
52  
53  
54  
55  
56  
57  
58  
59  
60

1  
2  
3  
4 Table 3). Age and education level were significantly associated with differences in using email  
5  
6  
7 and secure messaging ( $p < 0.001$  for all); those over the age of 65 (16.9%, 269/1592) and those  
8  
9  
10 with a high school degree or less (13.5%, 130/962) reported less use of email and secure  
11  
12  
13 messaging relative to other groups.  
14

15  
16  
17  
18  
19  
20 Overall, most respondents indicated they were extremely or somewhat comfortable with the  
21  
22  
23 privacy and security of virtual modalities including phone (92.4%, 3824/4139), video (95.2%,  
24  
25  
26 238/250) and email or secure messaging (91.3%, 794/870). Financial status, immigration status  
27  
28  
29 and self-reported health status were significantly associated with differences in comfort with  
30  
31  
32 virtual care use ( $p < 0.05$  for all); those having trouble making ends meet, those not born in  
33  
34  
35 Canada and those rating their health as fair or poor reported lower levels of comfort with phone  
36  
37  
38 calls and email or secure messaging relative to other groups (see Table 4).  
39  
40  
41  
42  
43  
44  
45  
46

#### 47 **Future preferences for virtual care**

48

49  
50 Seventy-five percent (3798/5068), 52.2% (2644/5068), and 42.9% (2172/5068) of respondents  
51  
52  
53 said they wanted their practice to continue offering phone, email/secure messaging, and video  
54  
55  
56  
57  
58  
59  
60

1  
2  
3 after the pandemic, respectively. Age, education status, financial status, immigration status and  
4  
5  
6 self-reported health status were significantly associated with differences in wanting ongoing use  
7  
8  
9  
10 of each of the three virtual care modalities ( $p < 0.05$  for all); those over age 65, those whose  
11  
12  
13 education was high school or less, those reporting yes or “I don’t know” when asked about  
14  
15  
16 difficulty making ends meet, those born outside Canada, and those in fair or poor health reported  
17  
18  
19 the lowest desire for the three virtual care modalities to continue after the pandemic compared to  
20  
21  
22 other groups (see Table 5).  
23  
24  
25  
26  
27  
28  
29

## 30 DISCUSSION

31  
32  
33 Our analysis of more than 7400 patient experience surveys across 13 primary care clinics during  
34  
35  
36 the first months of the COVID-19 pandemic found important differences in care-seeking and  
37  
38  
39 comfort with virtual care based on patient income, self-reported health, and other demographic  
40  
41  
42 characteristics. Most participants received care from their primary care clinic in some way during  
43  
44  
45 the study period; however, almost a third who sought care reported they delayed it due to  
46  
47  
48 concerns about the pandemic. Patients who had trouble making ends meet and those who  
49  
50  
51 reported their health as fair or poor were more likely to seek care during the pandemic, yet were  
52  
53  
54  
55  
56  
57  
58  
59  
60

1  
2  
3 also more likely to report they delayed seeking care. Patient generally reported a high degree of  
4  
5  
6  
7 comfort with phone, video and email or secure messaging. But, those reporting difficulty making  
8  
9  
10 ends meet, poor or fair health, and arriving in Canada in the last 10 years reported lower levels of  
11  
12  
13 comfort and less likely to want their practice to continue offering these virtual options.  
14  
15

16  
17  
18  
19  
20 Our results, similar to other emerging literature, suggests a complex relationship between the  
21  
22  
23 social determinants of health and patient comfort and preference regarding accessing care  
24  
25  
26 through virtual tools. A US based study prior to the pandemic found that while younger patients  
27  
28  
29 and those with physical disabilities were more likely to use video visits to access care, those who  
30  
31  
32 reported lower incomes and lived in rural populations were less likely to use this modality<sup>26</sup>. A  
33  
34  
35 recent US-based primary care study found that after care shifted to a virtual-first approach during  
36  
37  
38 the pandemic, a significantly smaller proportion of visits overall were with people who were low  
39  
40  
41 income, non-white, or non-English speakers<sup>27</sup>. However, a Canadian based study found that  
42  
43  
44 similar to our participants, those with the highest care needs (older, multiple co-morbidities),  
45  
46  
47 were more likely to access primary care during the early months of the pandemic compared to  
48  
49  
50  
51 other groups<sup>2</sup>.  
52  
53  
54  
55  
56  
57  
58  
59  
60

1  
2  
3  
4  
5  
6  
7 As many predict virtual care will continue to be a part of care delivery post-pandemic, this study  
8  
9  
10 highlights the importance of integrating patient experience data into future care delivery  
11  
12  
13 planning. Similar to other recently published data <sup>2,28,29</sup>, our experience data indicates phone was  
14  
15  
16 by far the most utilized modality of virtual care and overall, participants were comfortable using  
17  
18  
19 virtual modalities to receive care. Patients who report financial troubles and poor health, had a  
20  
21  
22 higher percentage reporting accessing care (virtually and in person) during the pandemic  
23  
24  
25 compared to other groups; however, they reported greater concerns with the privacy and security  
26  
27  
28 of virtual care and less desire for virtual care to be an ongoing part of their primary care  
29  
30  
31 experience. This suggests that while public health measures may have pushed populations with  
32  
33  
34 the highest care needs to use virtual care, these modalities did not provide all patients with an  
35  
36  
37 equitable, patient-centered care experience. Further research should explore reasons behind the  
38  
39  
40 relative discomfort and low interest in virtual care and how barriers could be addressed. While  
41  
42  
43 access to technology may be part of this problem, other factors such as health and digital literacy,  
44  
45  
46 and support from peers and health care providers may also be significant<sup>30</sup>. Without further  
47  
48  
49  
50  
51  
52  
53  
54  
55  
56  
57  
58  
59  
60

1  
2  
3 patient experience and demographic data to understand the ongoing use of virtual care, we risk  
4  
5  
6  
7 leaving behind those who need care most.  
8  
9

### 13 **Strengths and Limitations**

14  
15  
16  
17 Our study had several key strengths and limitations. Our study included a large sample of  
18  
19  
20 respondents from multiple clinics across both urban and suburban communities. Patients were  
21  
22  
23 randomly sampled using birth month. Survey questions were relevant to COVID-19 and  
24  
25  
26 informed by primary care leaders and patients. However, our findings are open to selection bias  
27  
28  
29 because of the response rate, mode of delivery, and the survey being offered primarily in  
30  
31  
32 English; however, demographics of our sample confirm that we reached a diverse group of  
33  
34  
35 patients. We found substantial differences in utilization and perspectives of virtual care by  
36  
37  
38 sociodemographic characteristics, but these may be an underestimate of true differences. Our  
39  
40  
41 survey reports on experience during the early phase of the pandemic and patients' comfort and  
42  
43  
44 preferences may have evolved since. Finally, although our sample was taken from 13 primary  
45  
46  
47  
48 care practices, these were all academic practices in the Greater Toronto Area where physicians  
49  
50  
51 were paid by capitation which may limit the generalizability of the findings.  
52  
53  
54  
55  
56  
57  
58  
59  
60

## CONCLUSIONS

We found that most patients were comfortable using virtual modalities and wanted virtual care options to continue. However, there were important differences by sociodemographic characteristics, for example, with those having difficulty making ends meet, reporting poor or fair health, and being born outside of Canada being less likely to report comfort with virtual modalities and less likely to want virtual care options to continue post-pandemic. Moving forward, clinicians and system decision makers need to carefully consider how we integrate virtual care into practices to ensure equity in access to primary care.

**Funding statement**

This research received no specific grant from any funding agency in the public, commercial or not-for-profit sectors.

**Ethics statement**

The initiative was formally reviewed by institutional authorities at Unity Health Toronto and deemed to neither require Research Ethics Board approval nor written informed consent from participants.

**Conflicts of interest**

The authors declare no conflicts of interest.

**Prior presentations:** None

**Author contributions**

PA and TK conceived of and designed the study together. RW and CM conducted the analysis. All authors helped interpret the data. PA drafted the manuscript with the support of TK and all authors critically reviewed it. All authors read and approved the final manuscript.

**Acknowledgements**

We wish to thank Ali Damji, Debbie Elman, Frances Cousins, Jennifer Stulberg, Joanne Laine-Gossin, Karuna Gupta, Linda Weber, Melissa Witty, Navsheer Gill Toor, Noor Ramji, Sakina Walji, Sam Tirkos, Susanna Fung, Susie Kim, Thuy Nga Pham, Tiffany Florindo for their support in developing and implementing the survey at their respective teaching practices, Trish O'Brien and Kirsten Eldridge for their support with survey implementation across all sites, Danielle Martin for her feedback on our draft manuscript, and the patient partners who helped us refine the survey questions.

Dr. Kiran is the Fidani Chair of Improvement and Innovation in Family Medicine at the University of Toronto and is supported as a Clinician Scientist by the Department of Family and Community Medicine (DFCM) at the University of Toronto and at St. Michael's Hospital. Funds from the Fidani Chair supported Dr. Agarwal as the Patient Experience Measurement Lead for the DFCM.

**Data sharing**

No additional data is available



1  
2  
3  
4  
5  
6  
7  
8  
9  
10  
11  
12  
13  
14  
15  
16  
17  
18  
19  
20  
21  
22  
23  
24  
25  
26  
27  
28  
29  
30  
31  
32  
33  
34  
35  
36  
37  
38  
39  
40  
41  
42  
43  
44  
45  
46  
47  
48  
49  
50  
51  
52  
53  
54  
55  
56  
57  
58  
59  
60

For peer review only

## REFERENCES

1. Lemire F, Slade S. Reflections on family practice and the pandemic first wave. *Can Fam Physician*. 2020;66(6):468.
2. Glazier RH, Green ME, Wu FC, Frymire E, Kopp A, Kiran T. Shifts in office and virtual primary care during the early COVID-19 pandemic in Ontario, Canada. *CMAJ*. 2021;193(6):E200-E210. doi:10.1503/cmaj.202303
3. Philip K, Cumella A, Farrington-Douglas J, Laffan M, Hopkinson N. Respiratory patient experience of measures to reduce risk of COVID-19: findings from a descriptive cross-sectional UK wide survey. *BMJ Open*. 2020;10(9):e040951. doi:[10.1136/bmjopen-2020-040951](https://doi.org/10.1136/bmjopen-2020-040951)
4. Krist AH, DeVoe JE, Cheng A, Ehrlich T, Jones SM. Redesigning Primary Care to Address the COVID-19 Pandemic in the Midst of the Pandemic. *Ann Fam Med*. 2020;18(4):349-354. doi:[10.1370/afm.2557](https://doi.org/10.1370/afm.2557)
5. Bhatia RS, Jamieson T, Shaw J, Piovesan C, Kelley LT, Falk W. Canada's virtual care revolution: A framework for success. *Commentary - C.D.Howe Institute*.

2020(586):0\_1,0\_2,1-20. <https://www.proquest.com/scholarly-journals/canadas-virtual-care-revolution-framework-success/docview/2480820454/se-2?accountid=201395>

6. Zulman DM, Verghese A. Virtual Care, Telemedicine Visits, and Real Connection in the Era of COVID-19: Unforeseen Opportunity in the Face of Adversity. *JAMA*. 2021;325(5):437-438. doi:[10.1001/jama.2020.27304](https://doi.org/10.1001/jama.2020.27304)
7. Herzer KR, Pronovost PJ. Ensuring Quality in the Era of Virtual Care. *JAMA*. 2021;325(5):429-430. doi:[10.1001/jama.2020.24955](https://doi.org/10.1001/jama.2020.24955)
8. Appireddy R, Jalini S, Shukla G, Boissé Lomax L. Tackling the Burden of Neurological Diseases in Canada with Virtual Care During the COVID-19 Pandemic and Beyond. *Can J Neurol Sci*. 2020;47(5):594-597. doi:[10.1017/cjn.2020.92](https://doi.org/10.1017/cjn.2020.92)
9. Rashid M. Virtual Inequity: Do virtual visits risk leaving some people behind? *Can Fam Physician*. 2020. Available at: <https://www.cfp.ca/news/2020/09/25/09-25>
10. Das LT, Gonzalez CJ. Preparing Telemedicine for the Frontlines of Healthcare Equity. *J GEN INTERN MED*. 2020;35(8):2443-2444. doi:[10.1007/s11606-020-05941-9](https://doi.org/10.1007/s11606-020-05941-9)

- 1  
2  
3  
4 11. Fujioka JK, Budhwani S, Thomas-Jacques T, et al. Challenges and Strategies for  
5  
6  
7 Promoting Health Equity in Virtual Care: Protocol for a Scoping Review of Reviews.  
8  
9  
10 *JMIR Res Protoc.* 2020;9(12):e22847. doi:[10.2196/22847](https://doi.org/10.2196/22847)  
11  
12  
13  
14 12. Peretz PJ, Islam N, Matiz LA. Community Health Workers and Covid-19 — Addressing  
15  
16  
17 Social Determinants of Health in Times of Crisis and Beyond. *N Engl J Med.*  
18  
19  
20 2020;383(19):e108. doi:[10.1056/NEJMp2022641](https://doi.org/10.1056/NEJMp2022641)  
21  
22  
23  
24 13. Chan S, O’Riordan A, Appireddy R. Exploring the Determinants and Experiences of  
25  
26  
27 Senior Stroke Patients with Virtual Care. *Can J Neurol Sci.* 2021;48(1):87-93.  
28  
29  
30 doi:[10.1017/cjn.2020.162](https://doi.org/10.1017/cjn.2020.162)  
31  
32  
33  
34 14. Scheerder A, van Deursen A, van Dijk J. Determinants of Internet skills, uses and  
35  
36  
37 outcomes. A systematic review of the second- and third-level digital divide. *Telematics*  
38  
39  
40 *and Informatics.* 2017;34(8):1607-1624. doi:[10.1016/j.tele.2017.07.007](https://doi.org/10.1016/j.tele.2017.07.007)  
41  
42  
43  
44 15. Velasquez D, Mehrotra A. Ensuring the Growth of Telehealth During COVID-19 Does  
45  
46  
47 Not Exacerbate Disparities in Care. *Health Affairs Blog.* 2020. doi:  
48  
49  
50 [10.1377/hblog20200505.591306](https://doi.org/10.1377/hblog20200505.591306)  
51  
52  
53  
54  
55  
56  
57  
58  
59  
60

- 1  
2  
3  
4 16. Tang E, Li MK, Mauti ER, Masi R, Goldberg R. “Doctor Zoom will see you now”: An  
5  
6  
7 equity-focused perspective on virtual care in the era of COVID-19. *University of Toronto*  
8  
9  
10 *Medical Journal*. 2021;98(2):4. Available at:  
11  
12  
13 <https://utmj.org/index.php/UTMJ/article/view/1424/1306>  
14  
15  
16  
17 17. Khairat S, Pillai M, Edson B, Gianforcaro R. Evaluating the Telehealth Experience of  
18  
19  
20 Patients With COVID-19 Symptoms: Recommendations on Best Practices. *Journal of*  
21  
22  
23 *Patient Experience*. 2020;7(5):665-672. doi:[10.1177/2374373520952975](https://doi.org/10.1177/2374373520952975)  
24  
25  
26  
27 18. Sirotych E, Dillingham S, Grainger R, et al. Capturing Patient-Reported Outcomes During  
28  
29  
30 the COVID-19 Pandemic: Development of the COVID-19 Global Rheumatology  
31  
32  
33 Alliance Patient Experience Survey. *Arthritis Care Res*. 2020;72(7):871-873.  
34  
35  
36  
37 doi:[10.1002/acr.24257](https://doi.org/10.1002/acr.24257)  
38  
39  
40  
41 19. Garrido-Cumbrera M, Marzo-Ortega H, Christen L, et al. Assessment of impact of the  
42  
43  
44 COVID-19 pandemic from the perspective of patients with rheumatic and  
45  
46  
47 musculoskeletal diseases in Europe: results from the REUMAVID study (phase 1). *RMD*  
48  
49  
50 *Open*. 2021;7(1):e001546. doi:[10.1136/rmdopen-2020-001546](https://doi.org/10.1136/rmdopen-2020-001546)  
51  
52  
53  
54  
55  
56  
57  
58  
59  
60

- 1  
2  
3  
4 20. Silvera GA, Wolf JA, Stanowski A, Studer Q. The influence of COVID-19 visitation  
5  
6  
7 restrictions on patient experience and safety outcomes: A critical role for subjective  
8  
9  
10 advocates. *Patient Experience Journal*. 2021;8(1):30-39. doi:[10.35680/2372-0247.1596](https://doi.org/10.35680/2372-0247.1596)  
11  
12  
13  
14 21. Bains J, Greenwald PW, Mulcare MR, et al. Utilizing Telemedicine in a Novel Approach  
15  
16  
17 to COVID-19 Management and Patient Experience in the Emergency Department.  
18  
19  
20 *Telemedicine and e-Health*. 2021;27(3):254-260. doi:[10.1089/tmj.2020.0162](https://doi.org/10.1089/tmj.2020.0162)  
21  
22  
23  
24 22. CIHI. Commonwealth Fund survey, 2019. [https://www.cihi.ca/en/commonwealth-fund-](https://www.cihi.ca/en/commonwealth-fund-survey-2019)  
25  
26  
27 [survey-2019](https://www.cihi.ca/en/commonwealth-fund-survey-2019)  
28  
29  
30  
31 23. Commonwealth Fund. 2019 Commonwealth Fund International Health Policy Survey of  
32  
33  
34 Primary Care Physicians.  
35  
36  
37 [https://www.commonwealthfund.org/publications/surveys/2019/dec/2019-](https://www.commonwealthfund.org/publications/surveys/2019/dec/2019-commonwealth-fund-international-health-policy-survey-primary)  
38  
39  
40 [commonwealth-fund-international-health-policy-survey-primary](https://www.commonwealthfund.org/publications/surveys/2019/dec/2019-commonwealth-fund-international-health-policy-survey-primary)  
41  
42  
43  
44 24. Hutchison B, Haj-Ali W, Dobell G, Yeritsyan N, Degani N, Gushue S. Prioritizing and  
45  
46  
47 Implementing Primary Care Performance Measures for Ontario. *Healthc Policy*.  
48  
49  
50 2020;16(1):43-57. doi:[10.12927/hcpol.2020.26291](https://doi.org/10.12927/hcpol.2020.26291)  
51  
52  
53  
54  
55  
56  
57  
58  
59  
60

- 1  
2  
3  
4 25. Health Quality Ontario. Primary Care Patient Experience Survey: Support Guide. 2015.  
5  
6  
7 12  
13  
14 26. Park J, Erikson C, Han X, Iyer P. Are State Telehealth Policies Associated With The Use  
15  
16  
17 Of Telehealth Services Among Underserved Populations? *Health Affairs*.  
18  
19  
20 2018;37(12):2060-2068. doi:[10.1377/hlthaff.2018.05101](https://doi.org/10.1377/hlthaff.2018.05101)  
21  
22  
23  
24 27. Nouri S, Khoong E, Lyles C, Karliner L. Addressing Equity in Telemedicine for Chronic  
25  
26  
27 Disease Management During the Covid-19 Pandemic. *NEJM Catalyst Innovations in*  
28  
29  
30 *Care Delivery*. 2020. <https://catalyst.nejm.org/doi/full/10.1056/CAT.20.0123>  
31  
32  
33  
34 28. Mehrotra A, Ray K, Brockmeyer DM, Barnett ML, Bender JA. Rapidly Converting to  
35  
36  
37 “Virtual Practices”: Outpatient Care in the Era of Covid-19. *NEJM Catalyst Innovations*  
38  
39  
40 *in Care Delivery*. 2020. <https://catalyst.nejm.org/doi/full/10.1056/CAT.20.0091>  
41  
42  
43  
44 29. Bhatia RS, Chu C, Pang A, Tadrous M, Stamenova V, Cram P. Virtual care use before  
45  
46  
47 and during the COVID-19 pandemic: a repeated cross-sectional study. *CMAJ Open*.  
48  
49  
50 2021;9(1):E107-E114. doi:10.9778/cmajo.20200311  
51  
52  
53  
54  
55  
56  
57  
58  
59  
60

- 1  
2  
3  
4 30. Weiss D, Rydland HT, Øversveen E, Jensen MR, Solhaug S, Krokstad S. Innovative  
5  
6  
7 technologies and social inequalities in health: A scoping review of the literature. Virgili  
8  
9  
10 G, ed. *PLoS ONE*. 2018;13(4):e0195447. doi:[10.1371/journal.pone.0195447](https://doi.org/10.1371/journal.pone.0195447)  
11  
12  
13  
14  
15  
16  
17  
18  
19  
20  
21  
22  
23  
24  
25  
26  
27  
28  
29  
30  
31  
32  
33  
34  
35  
36  
37  
38  
39  
40  
41  
42  
43  
44  
45  
46  
47  
48  
49  
50  
51  
52  
53  
54  
55  
56  
57  
58  
59  
60



**Table 1.** Demographic characteristics of survey respondents (n=7482)

| Demographic characteristic               | Survey respondents<br>n (%) |
|------------------------------------------|-----------------------------|
| <b>Age (n=6744)</b>                      |                             |
| 0 to 5 years old                         | 169 (2.51%)                 |
| 6 to 17 years old                        | 166 (2.46%)                 |
| 18 to 24 years old                       | 120 (1.78%)                 |
| 25 to 34 years old                       | 520 (7.71%)                 |
| 35 to 49 years old                       | 1412 (20.94%)               |
| 50 to 64 years old                       | 2002 (29.69%)               |
| 65 to 79 years old                       | 1921 (28.48%)               |
| 80 years or older                        | 434 (6.44%)                 |
| <b>Gender (n=6713)</b>                   |                             |
| Woman                                    | 4379 (65.23%)               |
| Man                                      | 2221 (33.09%)               |
| Other                                    | 60 (0.89%)                  |
| Prefer not to answer                     | 53 (0.79%)                  |
| <b>Education level (n=6588)</b>          |                             |
| Highschool or less                       | 1429 (21.69%)               |
| College/University                       | 3198 (48.54%)               |
| Graduate/Professional                    | 1961 (29.77%)               |
| <b>Trouble making ends meet (n=6556)</b> |                             |
| Yes                                      | 590 (9.00%)                 |

|                                         |                                 |               |
|-----------------------------------------|---------------------------------|---------------|
|                                         | No                              | 5201 (79.33%) |
|                                         | Don't know/Prefer not to answer | 765 (11.67%)  |
| <b>Born in Canada (n=6656)</b>          |                                 |               |
|                                         | Yes                             | 4728 (71.03%) |
|                                         | No                              | 1928 (28.97%) |
| <b>Arrive in last 10 years (n=1856)</b> |                                 |               |
|                                         | Yes                             | 326 (17.56%)  |
|                                         | No                              | 1530 (82.44%) |
| <b>Preferred language (n=6678)</b>      |                                 |               |
|                                         | English                         | 6576 (98.47%) |
|                                         | Non-English                     | 102 (1.53%)   |
| <b>Self rated health (n=6665)</b>       |                                 |               |
|                                         | Excellent                       | 1002 (15.03%) |
|                                         | Very good                       | 2599 (38.99%) |
|                                         | Good                            | 2086 (31.30%) |
|                                         | Fair/Poor                       | 978 (14.67%)  |
| <b>Usual PCP (n=6545)</b>               |                                 |               |
|                                         | Staff physician                 | 4842 (73.98%) |
|                                         | Resident physician              | 1217 (18.59%) |
|                                         | Nurse practitioner              | 173 (2.64%)   |
|                                         | Unsure                          | 313 (4.78%)   |

\*Created by the authors.

**Table 2.** Proportion of respondents who received care at their primary care practice who reported that they delayed seeking care because of the pandemic, by sociodemographic characteristic

| <b>Demographics</b>             | <b>Delayed Care<br/>n (%)</b> | <b>P-value</b> |
|---------------------------------|-------------------------------|----------------|
| <b>All</b>                      | 1509 (30.53%)                 |                |
| <b>Age</b>                      |                               |                |
| <18 years old                   | 61 (29.90%)                   | <0.01          |
| 18-34 years old                 | 158 (35.03%)                  |                |
| 35-64 years old                 | 704 (31.44%)                  |                |
| 65+ years old                   | 429 (26.85%)                  |                |
| <b>Gender</b>                   |                               |                |
| Woman                           | 932 (31.65%)                  | <0.001         |
| Man                             | 376 (26.07%)                  |                |
| Other                           | 20 (42.55%)                   |                |
| Prefer not to answer            | 18 (46.15%)                   |                |
| <b>Education</b>                |                               |                |
| Highschool or less              | 238 (24.74%)                  | <0.001         |
| College/University              | 637 (30.09%)                  |                |
| Graduate/Professional           | 443 (33.95%)                  |                |
| <b>Trouble making ends meet</b> |                               |                |
| Yes                             | 188 (42.63%)                  | <0.001         |
| No                              | 928 (27.33%)                  |                |
| Don't know/Prefer not to answer | 196 (37.69%)                  |                |

|                            |                    |               |        |
|----------------------------|--------------------|---------------|--------|
| <b>Born in Canada</b>      |                    |               |        |
|                            | Yes                | 966 (30.92%)  | 0.07   |
|                            | No                 | 366 (28.09%)  |        |
| <b>Arrive &lt;10 years</b> |                    |               |        |
|                            | Yes                | 66 (29.33%)   | 0.79   |
|                            | No                 | 289 (28.20%)  |        |
| <b>Preferred Language</b>  |                    |               |        |
|                            | English            | 1322 (30.20%) | 0.49   |
|                            | Non-English        | 24 (34.78%)   |        |
| <b>Self rated health</b>   |                    |               |        |
|                            | Excellent          | 153 (25.54%)  | <0.001 |
|                            | Very good          | 475 (28.84%)  |        |
|                            | Good               | 433 (30.20%)  |        |
|                            | Fair/Poor          | 275 (36.57%)  |        |
| <b>Usual PCP</b>           |                    |               |        |
|                            | Staff physician    | 976 (30.13%)  | 0.47   |
|                            | Resident physician | 246 (29.85%)  |        |
|                            | Nurse practitioner | 45 (36.59%)   |        |
|                            | Unsure             | 52 (29.21%)   |        |

\*Created by the authors.

1  
2  
3  
4  
5  
6  
7  
8  
9  
10  
11  
12  
13  
14  
15  
16  
17  
18  
19  
20  
21  
22  
23  
24  
25  
26  
27  
28  
29  
30  
31  
32  
33  
34  
35  
36  
37  
38  
39  
40  
41  
42  
43  
44  
45  
46  
47

**Table 3.** Percentage of patients who reported receiving care by phone and in person during the pandemic, by sociodemographic characteristic

| <b>Demographics</b>             | <b>In person care<br/>n (%)</b> | <b>P-value</b> | <b>Phone care<br/>n (%)</b> | <b>P-value</b> |
|---------------------------------|---------------------------------|----------------|-----------------------------|----------------|
| <b>All</b>                      | 1553 (30.64%)                   |                | 4195(82.77%)                |                |
| <b>Age</b>                      |                                 |                |                             |                |
| <18 years old                   | 102 (50.00%)                    | <0.001         | 143 (70.10%)                | <0.001         |
| 18-34 years old                 | 181 (40.13%)                    |                | 404 (89.58%)                |                |
| 35-64 years old                 | 603 (26.93%)                    |                | 1922 (85.84%)               |                |
| 65+ years old                   | 476 (29.79%)                    |                | 1338 (83.73%)               |                |
| <b>Gender</b>                   |                                 |                |                             |                |
| Woman                           | 882 (29.95%)                    | 0.57           | 2559 (86.89%)               | <0.001         |
| Man                             | 443 (30.72%)                    |                | 1163 (80.65%)               |                |
| Other                           | 17 (36.17%)                     |                | 41 (87.23%)                 |                |
| Prefer not to answer            | 9 (23.08%)                      |                | 33 (84.62%)                 |                |
| <b>Education Level</b>          |                                 |                |                             |                |
| Highschool or less              | 303 (31.50%)                    | 0.42           | 787 (81.81%)                | <0.05          |
| College/University              | 618 (29.19%)                    |                | 1818 (85.88%)               |                |
| Graduate/Professional           | 396 (30.34%)                    |                | 1109 (84.98%)               |                |
| <b>Trouble making ends meet</b> |                                 |                |                             |                |
| Yes                             | 122 (27.66%)                    | 0.28           | 396 (89.80%)                | <0.001         |
| No                              | 1047 (30.83%)                   |                | 2840 (83.63%)               |                |
| <b>Born in Canada</b>           |                                 |                |                             |                |

|                             |                    |               |        |               |        |
|-----------------------------|--------------------|---------------|--------|---------------|--------|
|                             | Yes                | 977 (31.27%)  | <0.05  | 2630 (84.19%) | 0.13   |
|                             | No                 | 363 (27.86%)  |        | 1121 (86.03%) |        |
| <b>Arrive &lt;10 years</b>  |                    |               |        |               |        |
|                             | Yes                | 77 (34.22%)   | <0.05  | 196 (87.11%)  | 0.73   |
|                             | No                 | 276 (26.93%)  |        | 881 (85.95%)  |        |
| <b>Preferred language</b>   |                    |               |        |               |        |
|                             | English            | 1326 (30.29%) | 0.88   | 3706 (84.67%) | 1.00   |
|                             | Non-English        | 22 (31.88%)   |        | 58 (84.06%)   |        |
| <b>Self Reported Health</b> |                    |               |        |               |        |
|                             | Excellent          | 221 (36.89%)  | <0.001 | 470 (78.46%)  | <0.001 |
|                             | Very good          | 522 (31.69%)  |        | 1390 (84.40%) |        |
|                             | Good               | 383 (26.71%)  |        | 1222 (85.22%) |        |
|                             | Fair/Poor          | 220 (29.26%)  |        | 673 (89.49%)  |        |
| <b>Usual PCP</b>            |                    |               |        |               |        |
|                             | Staff physician    | 963 (29.73%)  | 0.10   | 2750 (84.90%) | 0.22   |
|                             | Resident physician | 270 (32.77%)  |        | 701 (85.07%)  |        |
|                             | Nurse practitioner | 46 (37.40%)   |        | 97 (78.86%)   |        |
|                             | Unsure             | 50 (28.09%)   |        | 146 (82.02%)  |        |

\*Created by the authors.

**Table 4.** Percentage of patients who reported they were comfortable with the privacy and security of using phone, video and email or secure messaging to receive care during the pandemic, by sociodemographic characteristic

| Demographics                    | Phone<br>n (%) | P-value | Video<br>n (%) | P-value | Email<br>Messaging<br>n (%) | P-value |
|---------------------------------|----------------|---------|----------------|---------|-----------------------------|---------|
| <b>All</b>                      | 3824 (92.39%)  |         | 238 (95.20%)   |         | 794 (91.26%)                |         |
| <b>Age</b>                      |                |         |                |         |                             |         |
| <18 years old                   | 138 (96.50%)   | <0.05   | 19 (95.00%)    | 0.60    | 17 (94.44%)                 | 0.43    |
| 18-34 years old                 | 371 (91.83%)   |         | 28 (93.33%)    |         | 90 (87.38%)                 |         |
| 35-64 years old                 | 1800 (93.65%)  |         | 104 (94.55%)   |         | 383 (90.54%)                |         |
| 65+ years old                   | 1223 (91.41%)  |         | 63 (98.44%)    |         | 249 (92.57%)                |         |
| <b>Gender</b>                   |                |         |                |         |                             |         |
| Woman                           | 2385 (93.20%)  | <0.001  | 128 (96.97%)   | 0.17    | 501 (90.60%)                | <0.001  |
| Man                             | 1077 (92.61%)  |         | 75 (94.94%)    |         | 219 (92.80%)                |         |
| Other                           | 40 (97.56%)    |         | 4 (80.00%)     |         | 15 (100.00%)                |         |
| Prefer not to answer            | 24 (72.73%)    |         | 6 (85.71%)     |         | 2 (40.00%)                  |         |
| <b>Education Level</b>          |                |         |                |         |                             |         |
| Highschool or less              | 743 (94.41%)   | 0.17    | 47 (92.16%)    | 0.20    | 121 (93.08%)                | 0.65    |
| College/University              | 1679 (92.35%)  |         | 94 (97.92%)    |         | 358 (90.63%)                |         |
| Graduate/Professional           | 1032 (93.06%)  |         | 66 (92.96%)    |         | 250 (91.91%)                |         |
| <b>Trouble making ends meet</b> |                |         |                |         |                             |         |
| Yes                             | 354 (89.39%)   | <0.001  | 24 (92.31%)    | 0.63    | 70 (85.37%)                 | <0.001  |

|                                    |               |        |              |      |              |       |
|------------------------------------|---------------|--------|--------------|------|--------------|-------|
| No                                 | 2679 (94.33%) |        | 153 (96.23%) |      | 576 (93.96%) |       |
| I don't know/Prefer not to answer  | 400 (87.53%)  |        | 30 (96.77%)  |      | 75 (78.12%)  |       |
| <b>Born in Canada</b>              |               |        |              |      |              |       |
| Yes                                | 2471 (93.95%) | <0.001 | 159 (95.78%) | 1.00 | 526 (92.93%) | <0.05 |
| No                                 | 1019 (90.90%) |        | 54 (94.74%)  |      | 204 (87.18%) |       |
| <b>Arrive in the last 10 years</b> |               |        |              |      |              |       |
| Yes                                | 176 (89.80%)  | 0.80   | 7 (100.00%)  | 1.00 | 34 (82.93%)  | 0.52  |
| No                                 | 799 (90.69%)  |        | 45 (93.75%)  |      | 163 (88.11%) |       |
| <b>Preferred language</b>          |               |        |              |      |              |       |
| English                            | 3440 (92.82%) | 0.50   | 209 (95.43%) | 0.48 | 727 (91.33%) | 0.40  |
| Non-English                        | 52 (89.66%)   |        | 3 (75.00%)   |      | 7 (77.78%)   |       |
| <b>Self Reported Health</b>        |               |        |              |      |              |       |
| Excellent                          | 455 (96.81%)  | <0.001 | 30 (93.75%)  | 0.98 | 105 (95.45%) | <0.05 |
| Very good                          | 1324 (95.25%) |        | 65 (95.59%)  |      | 259 (93.50%) |       |
| Good                               | 1131 (92.55%) |        | 72 (94.74%)  |      | 235 (90.04%) |       |
| Fair/Poor                          | 579 (86.03%)  |        | 42 (95.45%)  |      | 133 (85.81%) |       |
| <b>Usual PCP</b>                   |               |        |              |      |              |       |
| Staff physician                    | 2575 (93.64%) | <0.05  | 164 (96.47%) | 0.17 | 568 (92.21%) | 0.07  |
| Resident physician                 | 640 (91.30%)  |        | 28 (87.50%)  |      | 107 (87.70%) |       |
| Nurse practitioner                 | 86 (88.66%)   |        | 4 (100.00%)  |      | 17 (89.47%)  |       |
| Unsure                             | 130 (89.04%)  |        | 11 (91.67%)  |      | 24 (80.00%)  |       |

\*Created by the authors.



1  
2  
3  
4  
5  
6  
7  
8  
9  
10  
11  
12  
13  
14  
15  
16  
17  
18  
19  
20  
21  
22  
23  
24  
25  
26  
27  
28  
29  
30  
31  
32  
33  
34  
35  
36  
37  
38  
39  
40  
41  
42  
43  
44  
45  
46  
47

For peer review only

**Table 5.** Preferences for ongoing uses of virtual care options after the pandemic, by sociodemographic characteristic

| Demographics                      | Phone<br>n (%) | P-value | Video<br>n (%) | P-value | Email<br>Messaging<br>n (%) | P-value |
|-----------------------------------|----------------|---------|----------------|---------|-----------------------------|---------|
| <b>All</b>                        | 3798 (74.94%)  |         | 2172 (42.86%)  |         | 2644 (52.17%)               |         |
| <b>Age</b>                        |                |         |                |         |                             |         |
| <18 years old                     | 171 (83.82%)   | <0.05   | 120 (58.82%)   | <0.001  | 117 (57.35%)                | <0.001  |
| 18-34 years old                   | 385 (85.37%)   |         | 252 (55.88%)   |         | 292 (64.75%)                |         |
| 35-64 years old                   | 1886 (84.23%)  |         | 1206 (53.86%)  |         | 1352 (60.38%)               |         |
| 65+ years old                     | 1291 (80.79%)  |         | 549 (34.36%)   |         | 834 (52.19%)                |         |
| <b>Gender</b>                     |                |         |                |         |                             |         |
| Woman                             | 2510 (85.23%)  | <0.001  | 1418 (48.15%)  | 0.45    | 1758 (59.69%)               | <0.01   |
| Man                               | 1142 (79.20%)  |         | 662 (45.91%)   |         | 780 (54.09%)                |         |
| Other                             | 37 (78.72%)    |         | 23 (48.94%)    |         | 31 (65.96%)                 |         |
| Prefer not to answer              | 29 (74.36%)    |         | 21 (53.85%)    |         | 20 (51.28%)                 |         |
| <b>Education Level</b>            |                |         |                |         |                             |         |
| Highschool or less                | 770 (80.04%)   | <0.05   | 384 (39.92%)   | <0.001  | 468 (48.65%)                | <0.001  |
| College/University                | 1777 (83.94%)  |         | 993 (46.91%)   |         | 1227 (57.96%)               |         |
| Graduate/Professional             | 1098 (84.14%)  |         | 705 (54.02%)   |         | 846 (64.83%)                |         |
| <b>Trouble making ends meet</b>   |                |         |                |         |                             |         |
| Yes                               | 362 (82.09%)   | <0.001  | 195 (44.22%)   | <0.001  | 257 (58.28%)                | <0.001  |
| No                                | 2869 (84.48%)  |         | 1665 (49.03%)  |         | 2037 (59.98%)               |         |
| I don't know/Prefer not to answer | 387 (74.42%)   |         | 204 (39.23%)   |         | 232 (44.62%)                |         |

|                                    |               |        |               |        |               |        |  |
|------------------------------------|---------------|--------|---------------|--------|---------------|--------|--|
| <b>Born in Canada</b>              |               |        |               |        |               |        |  |
| Yes                                | 2687 (86.01%) | <0.001 | 1579 (50.54%) | <0.001 | 1890 (60.50%) | <0.001 |  |
| No                                 | 1005 (77.13%) |        | 527 (40.45%)  |        | 683 (52.42%)  |        |  |
| <b>Arrive in the last 10 years</b> |               |        |               |        |               |        |  |
| Yes                                | 166 (73.78%)  | 0.13   | 89 (39.56%)   | 0.90   | 101 (44.89%)  | <0.05  |  |
| No                                 | 806 (78.63%)  |        | 413 (40.29%)  |        | 554 (54.05%)  |        |  |
| <b>Preferred language</b>          |               |        |               |        |               |        |  |
| English                            | 3642 (83.21%) | 0.12   | 2086 (47.66%) | 0.08   | 2532 (57.85%) | <0.05  |  |
| Non-English                        | 52 (75.36%)   |        | 25 (36.23%)   |        | 29 (42.03%)   |        |  |
| <b>Self Reported Health</b>        |               |        |               |        |               |        |  |
| Excellent                          | 519 (86.64%)  | <0.01  | 330 (55.09%)  | <0.001 | 382 (63.77%)  | <0.001 |  |
| Very good                          | 1392 (84.52%) |        | 843 (51.18%)  |        | 977 (59.32%)  |        |  |
| Good                               | 1179 (82.22%) |        | 635 (44.28%)  |        | 809 (56.42%)  |        |  |
| Fair/Poor                          | 597 (79.39%)  |        | 294 (39.10%)  |        | 394 (52.39%)  |        |  |
| <b>Usual PCP</b>                   |               |        |               |        |               |        |  |
| Staff physician                    | 2730 (84.29%) | <0.001 | 1613 (49.80%) | <0.001 | 1943 (59.99%) | <0.001 |  |
| Resident physician                 | 659 (79.98%)  |        | 336 (40.78%)  |        | 415 (50.36%)  |        |  |
| Nurse practitioner                 | 104 (84.55%)  |        | 55 (44.72%)   |        | 73 (59.35%)   |        |  |
| Unsure                             | 133 (74.72%)  |        | 79 (44.38%)   |        | 92 (51.69%)   |        |  |

\*Created by the authors.

# Improving your Patient Experience

Dept of Family and Community Medicine, University of Toronto  
Draft Jun 1, 2020

---

## Start of Block: Intro Block

Q1 Dear THE CLINIC'S NAME Patient,

The CLINIC wants to know about your experience getting health care during the COVID-19 pandemic. We are asking you to complete a short survey, which will take about 5 minutes. Your answers will help us to improve the care we provide.

You are receiving this survey because either you or your family member is a patient with CLINIC and have a birthday in MONTH1, MONTH2, MONTH3. Participation is voluntary and responses are confidential. We do not ask for your name in the survey and your answers cannot be linked back to your chart. We are interested in your honest opinion, whether it is negative or positive. Your responses to this survey will not change the care you receive from us.

PLEASE NOTE: This survey is for the person in your family who has a birthday in MONTH1, MONTH2, MONTH3. If this person is someone you are a caregiver for (a child or parent), please respond based on their care experience. If your own birthday is also in MONTH 1, MONTH 2, MONTH 3, you can choose to respond based on your own care experience.

## End of Block: Intro Block

---

## Start of Block: Block 1

Q2 Section 1 – Care needs during pandemic

*The following questions will help us better understand your comfort with accessing care during the COVID-19 pandemic. Please think about the care you received after March 17, 2020 (the date Ontario declared a state of emergency due to COVID-19).*

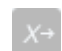

1  
2  
3 **Q3 Did you receive care from a doctor, nurse or healthcare provider at CLINIC during the**  
4 **COVID-19 pandemic? This includes care delivered in person, by phone, by video or by**  
5 **email or secure message.**  
6

7  
8  Yes (1)  
9

10  No (2)  
11  
12

13 *Skip To: Q12 If DFCM1.1 = No*  
14

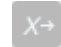

17  
18  
19 **Q4 How did you receive care during this time? (Select all that apply)**  
20

21  In person (1)  
22

23  Phone call (2)  
24

25  Video (3)  
26

27  Email or secure message (4)  
28  
29  
30  
31  
32  
33

34  
35 *Display This Question:*

36 *If DFCM1.2 = Phone call*  
37

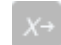

1  
2  
3 Q5 When using the PHONE to discuss your health concerns, how comfortable were you with  
4 the level of privacy and security? (Select one response)  
5  
6

- 7  Extremely comfortable (1)  
8  
9  Somewhat comfortable (2)  
10  
11  Neither comfortable nor uncomfortable (3)  
12  
13  Somewhat uncomfortable (4)  
14  
15  Extremely uncomfortable (5)  
16  
17  
18  
19

20  
21 *Display This Question:*

22 *If DFCM1.2 = Phone call*  
23

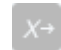

25  
26 Q6 When using the PHONE , was there anything you did not talk about because you were  
27 worried about privacy? (Select one response with optional comments)  
28  
29

- 30  Yes (1)  
31  
32  No (2)  
33  
34  Comments: (3) \_\_\_\_\_  
35  
36  
37  
38  
39

40  
41 *Display This Question:*

42 *If DFCM1.2 = Video*  
43

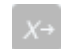

1  
2  
3 Q7 When using VIDEO to discuss your health concerns, how comfortable were you with the  
4 level of privacy and security? (Select one response)  
5  
6

- 7  Extremely comfortable (1)  
8  
9  Somewhat comfortable (2)  
10  
11  Neither comfortable nor uncomfortable (3)  
12  
13  Somewhat uncomfortable (4)  
14  
15  Extremely uncomfortable (5)  
16  
17  
18  
19

20  
21 *Display This Question:*

22 *If DFCM1.2 = Video*  
23

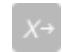

25  
26 Q8 When using VIDEO, was there anything you did not talk about because you were  
27 worried about privacy? (Select one response with optional comments)  
28  
29

- 30  Yes (1)  
31  
32  No (2)  
33  
34  Comments: (3) \_\_\_\_\_  
35  
36  
37  
38  
39

40  
41 *Display This Question:*

42 *If DFCM1.2 = Email or secure message*  
43

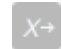

1  
2  
3 Q9 When using EMAIL or SECURE MESSAGE to discuss your health concerns, how  
4 comfortable were you with the level of privacy and security? (Select one response)  
5  
6

- 7  Extremely comfortable (1)  
8  
9  Somewhat comfortable (2)  
10  
11  Neither comfortable nor uncomfortable (3)  
12  
13  Somewhat uncomfortable (4)  
14  
15  Extremely uncomfortable (5)  
16  
17  
18  
19

20  
21 *Display This Question:*

22 *If DFCM1.2 = Email or secure message*  
23

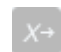

25  
26 Q10 When using EMAIL or SECURE MESSAGE, was there anything you did not talk about  
27 because you were worried about privacy? (Select one response with optional comments)  
28  
29

- 30  Yes (1)  
31  
32  No (2)  
33  
34  Comments: (3) \_\_\_\_\_  
35  
36  
37  
38  
39

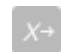

42  
43  
44 Q11 Did you avoid or delay receiving care from THE CLINIC because of the COVID-19  
45 pandemic? (Select one response)  
46  
47

- 48  Yes (1)  
49  
50  No (2)  
51  
52  
53  
54  
55  
56  
57  
58  
59  
60



1  
2  
3  
4  
5  
6  
7  
8  
9  
10  
11  
12  
13  
14  
15  
16  
17  
18  
19  
20  
21  
22  
23  
24  
25  
26  
27  
28  
29  
30  
31  
32  
33  
34  
35  
36  
37  
38  
39  
40  
41  
42  
43  
44  
45  
46  
47  
48  
49  
50  
51  
52  
53  
54  
55  
56  
57  
58  
59  
60

Display This Question:

If DFCM1.1 = No

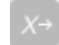

**Q12 Please tell us why you did not get care from THE CLINIC during the COVID pandemic:** (Select all that apply)

- I did not have any health needs (1)
- I did not know I could receive care from the clinic during the pandemic (2)
- I did not want to come into the clinic because I was worried for my personal safety (3)
- I tried but could not get an appointment (4)
- The hours were inconvenient (5)
- I could not get through to the clinic on the phone (7)
- Other (please specify): (6)
- 

Display This Question:

If DFCM1.1 = No

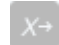

1  
2  
3 **Q13 Did you get care somewhere else during the COVID pandemic?** (Select all that apply)  
4  
5

6   No, I did not get care elsewhere (1)  
7

8  
9  I got care from a walk-in clinic in person (2)  
10

11  
12  I got care from a walk-in clinic by phone or video (3)  
13

14  
15  I went to the emergency department (4)  
16

17  
18  Other (please specify): (5)  
19  
20  
21  
22

23 End of Block: Block 1  
24

25 Start of Block: Block 2  
26  
27

28 **Q14 Section 2: Getting URGENT CARE when you are sick during the COVID-19 pandemic**

29 *The following questions help us better understand the experience of patients who were sick*  
30 *and wanted to be seen urgently. Please answer the questions below for the time during the*  
31 *COVID-19 pandemic only (starting March 17, 2020).*  
32  
33

34 -----

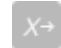

37  
38  
39 **Q15 During the COVID-19 pandemic, was there a time when you were sick and**  
40 **URGENTLY needed care at THE CLINC?** (Select one response)  
41

42  Yes (1)  
43

44  No (2)  
45  
46

47  
48 Skip To: End of Block If DFCM2.1 = No  
49

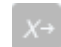

52  
53 **Q16 Think about the time you needed URGENT CARE. How many days did it take from**  
54 **when you first tried to book an appointment at our clinic to when you received care?**  
55  
56  
57  
58

Care could include an in-person visit, phone visit, video visit and/or email or secure messaging. (Select one response).

- On the same day (1)
- The next day (2)
- In 2 to 3 days (3)
- In 4 to 7 days (4)
- After more than 1 week (5)
- Never able to get an appointment (6)
- Not sure (7)

*Display This Question:*

*If DFCM2.2 = In 2 to 3 days*

*Or DFCM2.2 = In 4 to 7 days*

*And DFCM2.2 = After more than 1 week*

*And DFCM2.2 = Never able to get an appointment*

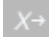

Q17 Why were you not able to get care the same or next day? (Select all that apply)

- I was informed that there was no availability (1)
- I was offered an appointment but not with the provider I preferred (2)
- I was offered an appointment but not at the time I preferred (3)
- I could not get through to the clinic on the phone (4)
- Other (Please specify) (5)
-

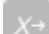

Q18 How would you describe the length of time it took between making the appointment and receiving care? (Select one response)

- About right (1)
  - Somewhat too long (2)
  - Much too long (3)
- 

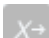

Q19 During the COVID-19 pandemic, did you need urgent care on an evening, weekend, or public holiday?

- Yes (1)
  - No (2)
- 

*Display This Question:*

*If DFCM2.5 = Yes*

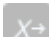

Q20 How easy or difficult was it to get urgent care from CLINIC on an evening, weekend, or holiday during the COVID-19 pandemic?

- Very easy (1)
- Somewhat easy (2)
- Neither easy nor difficult (3)
- Somewhat difficult (4)
- Very difficult (5)

**End of Block: Block 2**

---

**Start of Block: Block 3**

1  
2  
3  
4  
5  
6  
7  
8  
9  
10  
11  
12  
13  
14

**Q21 Section 3: Care experience**

*For the next set of questions, please think about your experience when receiving care from your doctor or nurse practitioner during the COVID-19 pandemic only (starting March 17, 2020). This includes care delivered in person, by phone, by video or by email or secure message.*

15  
16  
17  
18  
19  
20  
21  
22  
23  
24  
25  
26  
27  
28  
29  
30  
31  
32  
33

---

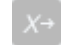

**Q22 How often did you receive care from the doctor or nurse practitioner that you prefer?**  
(select one response)

- 34  
35  
36  
37  
38  
39  
40  
41  
42  
43  
44  
45  
46  
47  
48  
49  
50  
51  
52  
53
- I do not have a preferred health care provider (1)
  - Always (2)
  - Usually (3)
  - Occasionally (4)
  - Rarely (5)
  - Never (6)
- 

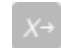

**Q23 How often did you receive care within a reasonable time from your doctor or nurse practitioner?** (Select one response)

- 54  
55  
56  
57  
58  
59  
60
- Always (1)
  - Usually (2)
  - Occasionally (3)
  - Rarely (4)
  - Never (5)
- 

Page Break

1  
2  
3  
4  
5  
6  
7  
8  
9  
10  
11  
12  
13  
14  
15  
16  
17  
18  
19  
20  
21  
22  
23  
24  
25  
26  
27  
28  
29  
30  
31  
32  
33  
34  
35  
36  
37  
38  
39  
40  
41  
42  
43  
44  
45  
46  
47  
48  
49  
50  
51  
52  
53  
54  
55  
56  
57  
58  
59  
60

For peer review only

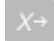

1  
2  
3  
4  
5  
6 **Q24 When you received care from your doctor or nurse practitioner, how often did they**  
7 **involve you as much as you want to be in decisions about your care and**  
8 **treatment?** (Select one response)  
9

- 10  Always (1)  
11  
12  Usually (2)  
13  
14  Occasionally (3)  
15  
16  Rarely (4)  
17  
18  Never (5)  
19  
20  
21  
22

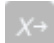

23  
24  
25  
26  
27 **Q25 When you received care from your doctor or nurse practitioner, how often did they**  
28 **spend enough time with you?** (Select one response)  
29

- 30  
31  Always (1)  
32  
33  Usually (2)  
34  
35  Occasionally (3)  
36  
37  Rarely (4)  
38  
39  Never (5)  
40  
41  
42  
43

44 **End of Block: Block 3**

45  
46 **Start of Block: Block ADDITIONAL**

47  
48  
49 **Q26 Click to write the question text**

50  
51  
52 **End of Block: Block ADDITIONAL**

53  
54 **Start of Block: Block 4**  
55  
56  
57  
58  
59  
60

1  
2  
3 **Q27 Section 4: Your recommendations** *For the next set of questions, please share your*  
4 *thoughts on how we can improve THE CLINIC.*  
5  
6  
7 -----

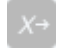

9  
10  
11 **Q28 After the COVID-19 pandemic is over, which of these care options should the clinic**  
12 **continue to offer?** (Select all that apply)  
13

- 14  Phone (1)  
15  
16  Video (2)  
17  
18  Email/secure messaging portal (3)  
19  
20  Other (4) \_\_\_\_\_  
21  
22  None of the above (5)  
23  
24  
25  
26  
27  
28  
29  
30

31 -----  
32  
33 **Q29 What changes did our clinic make during COVID-19 that you would like us to**  
34 **continue?** (Optional)  
35

36 \_\_\_\_\_  
37  
38 \_\_\_\_\_  
39  
40 \_\_\_\_\_  
41  
42 \_\_\_\_\_  
43  
44 \_\_\_\_\_  
45  
46 \_\_\_\_\_  
47

48 -----  
49  
50 **Q30 What do you think our clinic could have done differently to better meet your health**  
51 **needs during the COVID-19 pandemic?** (Optional)  
52

53 \_\_\_\_\_  
54  
55 \_\_\_\_\_  
56  
57  
58  
59  
60



1  
2  
3  
4  
5  
6  
7  
8  
9  
10  
11  
12  
13  
14  
15  
16  
17  
18  
19  
20  
21  
22  
23  
24  
25  
26  
27  
28  
29  
30  
31  
32  
33  
34  
35  
36  
37  
38  
39  
40  
41  
42  
43  
44  
45  
46  
47  
48  
49  
50  
51  
52  
53  
54  
55  
56  
57  
58  
59  
60

---

---

---

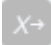

**Q31 Overall, would you recommend our clinic, to your friends and family? (Select one response)**

- Yes (1)
- No (2)

End of Block: Block 4

---

Start of Block: Block 5a

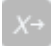

**Q32 Are you filling this survey out on behalf of someone else? (Select one response)**

- Yes (1)
- No (2)

End of Block: Block 5a

---

Start of Block: Block 5b - Family

**Q33 Section 5: About Your Family Member**

This final section of the survey helps us understand if some groups are experiencing care differently than others.

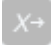

1  
2  
3 Q34 I am filling this survey on behalf of my child or family member who is: (optional)  
4  
5

- 6  0-5 years old (1)  
7  
8  6-17 years old (2)  
9  
10  18-24 years old (3)  
11  
12  25-34 years old (4)  
13  
14  35-49 years old (5)  
15  
16  50-64 years old (6)  
17  
18  65-79 years old (7)  
19  
20  80+ years old (8)  
21  
22  
23  
24

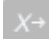

28  
29  
30 Q35 What gender do they identify with? (optional)  
31

- 32  Woman/girl (1)  
33  
34  Man/boy (2)  
35  
36  Transgender woman/girl (3)  
37  
38  Transgender man/boy (4)  
39  
40  Non-binary (for example gender queer, 2-spirit) (5)  
41  
42  Identity not listed (please specify) (6)  
43  
44  
45  
46  
47  
48  Prefer not to answer (7)  
49  
50

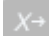

1  
2  
3 Q36 What is their highest level of education? (optional)  
4  
5

- 6  Elementary school or less (1)  
7  
8  Some High school (2)  
9  
10  High School Diploma (3)  
11  
12  College or University Diploma Degree (4)  
13  
14  Graduate or Professional Degree (5)  
15  
16  
17

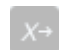

21  
22 Q37 Do they have trouble making ends meet (money problems) at the end of the month?  
23 (optional)  
24

- 25  
26  Yes (1)  
27  
28  No (2)  
29  
30  I don't know (3)  
31  
32  Prefer not to answer (4)  
33  
34  
35

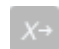

39  
40 Q38 Were they born in Canada? (optional)  
41

- 42  Yes (1)  
43  
44  No (2)  
45  
46  
47

48 -----  
49 **Display This Question:**

50 *If DFCM5b.5 = No*  
51

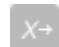

1  
2  
3 **Q39 Did you arrive in Canada in the last 10 years?** (optional)  
4

5  Yes (1)  
6  
7

8  No (2)  
9  
10

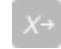

13  
14  
15 **Q40 What language would they prefer speaking with their primary care**  
16 **provider?** (optional)  
17

18  English (1)  
19

20  French (2)  
21

22  Other (please specify): (3) \_\_\_\_\_  
23  
24  
25

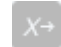

28  
29  
30 **Q41 In general, would you say their health is:** (optional)  
31

32  Excellent (1)  
33

34  Very Good (2)  
35

36  Good (3)  
37

38  Fair (4)  
39

40  Poor (5)  
41  
42  
43  
44

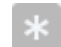

47  
48  
49 **Q42 What is their postal code?** (optional)  
50  
51  
52 \_\_\_\_\_  
53  
54 -----  
55  
56  
57  
58  
59  
60



Q43 Which primary care provider do they usually see? (optional)

- Staff Physician (1)
- Resident Physician (2)
- Nurse Practitioner (3)
- Unsure (4)

End of Block: Block 5b - Family

---

Start of Block: Block 5c - Yourself

#### Q44 Section 5: About You

This final section of the survey helps us understand if some groups are experiencing care differently than others.



Q45 How old are you? (optional)

- 0-5 years old (1)
- 6-17 years old (2)
- 18-24 years old (3)
- 25-34 years old (4)
- 35-49 years old (5)
- 50-64 years old (6)
- 65-79 years old (7)
- 80+ years old (8)

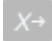

Q46 **What gender do you identify with?** (optional)

- Woman/girl (1)
  - Man/boy (2)
  - Transgender woman/girl (3)
  - Transgender man/boy (4)
  - Non-binary (for example gender queer, 2-spirit) (5)
  - Identity not listed (please specify) (6)
- 
- Prefer not to answer (7)

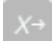

Q47 **What is your highest level of education?** (optional)

- Elementary school or less (1)
- Some High school (2)
- High School Diploma (3)
- College or University Diploma Degree (4)
- Graduate or Professional Degree (5)

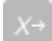

1  
2  
3 **Q48 Do you have trouble making ends meet (money problems) at the end of the**  
4 **month?** (optional)  
5

- 6  
7  Yes (1)  
8  
9  No (2)  
10  
11  I don't know (3)  
12  
13  Prefer not to answer (4)  
14  
15  
16
- 

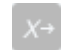

17  
18  
19  
20  
21 **Q49 Were you born in Canada?** (optional)  
22

- 23  Yes (1)  
24  
25  No (2)  
26  
27  
28
- 

29  
30 *Display This Question:*

31 *If DFCM5c.5 = No*  
32

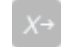

33  
34  
35  
36 **Q50 Did you arrive in Canada in the last 10 years?** (optional)  
37

- 38  Yes (1)  
39  
40  No (2)  
41  
42  
43
- 

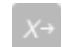

1  
2  
3 **Q51 What language would you prefer speaking with your primary care**  
4 **provider?** (optional)  
5

6  
7  English (1)  
8

9  French (2)  
10

11  Other (please specify): (3) \_\_\_\_\_  
12  
13

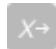

17  
18 **Q52 In general, would you say your health is:** (optional)  
19

20  
21  Excellent (1)  
22

23  Very Good (2)  
24

25  Good (3)  
26

27  Fair (4)  
28

29  Poor (5)  
30  
31  
32  
33

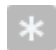

36  
37 **Q53 What is your postal code?** (optional)  
38

39 \_\_\_\_\_  
40  
41  
42

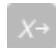



1  
2  
3 Q54 Which primary care provider do you usually see? (optional)  
4  
5

- 6  Staff Physician (1)  
7  
8  Resident Physician (2)  
9  
10  Nurse Practitioner (3)  
11  
12  Unsure (4)  
13  
14  
15

16 End of Block: Block 5c - Yourself  
17

---

18 Start of Block: End of Survey  
19  
20

21 Q55 Thank you for spending the time to complete this survey. Note: Please click "Submit" to  
22 record all your answers.  
23  
24

25 End of Block: End of Survey  
26

---

1  
2  
3 **SUPPLEMENTARY FILE 2: Site Demographics**  
4  
5  
6

7

| Site name                                                                  | City        | Number of surveys sent<br>(N= 32, 307) | Number of responses<br>(N=7,532) | Response Rate<br>(%) |
|----------------------------------------------------------------------------|-------------|----------------------------------------|----------------------------------|----------------------|
| <b>Barrie and Community Family Health Team</b>                             | Barrie      | 748                                    | 279                              | 37%                  |
| <b>Credit Valley Family Health Team</b>                                    | Mississauga | 2,056                                  | 645                              | 31%                  |
| <b>Health for All Family Health Team</b>                                   | Markham     | 1,900                                  | 535                              | 28%                  |
| <b>Mount Sinai Academic Family Health Team</b>                             | Toronto     | 2,100                                  | 391                              | 19%                  |
| <b>Southlake Family Health Team</b>                                        | Newmarket   | 1,968                                  | 735                              | 37%                  |
| <b>North York Family Health Team</b>                                       | North York  | 1,466                                  | 390                              | 27%                  |
| <b>Platinum Medical Family Health Organization</b>                         | Scarborough | 1,792                                  | 222                              | 12%                  |
| <b>Sunnybrook Academic Family Health Team</b>                              | Toronto     | 1,447                                  | 409                              | 28%                  |
| <b>St. Joseph's Health Centre Family Medicine/Urban Family Health Team</b> | Toronto     | 1,135                                  | 265                              | 23%                  |

8  
9  
10  
11  
12  
13  
14  
15  
16  
17  
18  
19  
20  
21  
22  
23  
24  
25  
26  
27  
28  
29  
30  
31  
32  
33  
34  
35  
36  
37  
38  
39  
40  
41  
42  
43  
44  
45  
46  
47

1  
2  
3  
4  
5  
6  
7  
8  
9  
10  
11  
12  
13  
14  
15  
16  
17  
18  
19  
20  
21  
22  
23  
24  
25  
26  
27  
28  
29  
30  
31  
32  
33  
34  
35  
36  
37  
38  
39  
40  
41  
42  
43  
44  
45  
46  
47

|                                                               |             |       |      |     |
|---------------------------------------------------------------|-------------|-------|------|-----|
| <b>St. Michael’s Hospital Academic Family Health Team</b>     | Toronto     | 5,180 | 1337 | 26% |
| <b>South East Toronto Family Health Team</b>                  | Toronto     | 5,244 | 591  | 11% |
| <b>Summerville Family Health Team</b>                         | Mississauga | 5,070 | 1426 | 28% |
| <b>Women’s College Hospital Family Practice Health Centre</b> | Toronto     | 2,201 | 307  | 14% |

\*Created by the authors.

For peer review only

### Checklist for Reporting Results of Internet E-Surveys (CHERRIES)

| <b>Checklist Item</b>            | <b>Explanation</b>                                                                                                                                                                                                                                                                                                                                                                                                                           | <b>Page Number</b> |
|----------------------------------|----------------------------------------------------------------------------------------------------------------------------------------------------------------------------------------------------------------------------------------------------------------------------------------------------------------------------------------------------------------------------------------------------------------------------------------------|--------------------|
| Describe survey design           | Describe target population, sample frame. Is the sample a convenience sample? (In "open" surveys this is most likely.)                                                                                                                                                                                                                                                                                                                       | 5                  |
| IRB approval                     | Mention whether the study has been approved by an IRB.                                                                                                                                                                                                                                                                                                                                                                                       | 6                  |
| Informed consent                 | Describe the informed consent process. Where were the participants told the length of time of the survey, which data were stored and where and for how long, who the investigator was, and the purpose of the study?                                                                                                                                                                                                                         | 7                  |
| Data protection                  | If any personal information was collected or stored, describe what mechanisms were used to protect unauthorized access.                                                                                                                                                                                                                                                                                                                      | 7                  |
| Development and testing          | State how the survey was developed, including whether the usability and technical functionality of the electronic questionnaire had been tested before fielding the questionnaire.                                                                                                                                                                                                                                                           | 7                  |
| Open survey versus closed survey | An "open survey" is a survey open for each visitor of a site, while a closed survey is only open to a sample which the investigator knows (password-protected survey).                                                                                                                                                                                                                                                                       | 6                  |
| Contact mode                     | Indicate whether or not the initial contact with the potential participants was made on the Internet. (Investigators may also send out questionnaires by mail and allow for Web-based data entry.)                                                                                                                                                                                                                                           | 6                  |
| Advertising the survey           | How/where was the survey announced or advertised? Some examples are offline media (newspapers), or online (mailing lists – If yes, which ones?) or banner ads (Where were these banner ads posted and what did they look like?). It is important to know the wording of the announcement as it will heavily influence who chooses to participate. Ideally the survey announcement should be published as an appendix.                        | 6                  |
| Web/E-mail                       | State the type of e-survey (eg, one posted on a Web site, or one sent out through e-mail). If it is an e-mail survey, were the responses entered manually into a database, or was there an automatic method for capturing responses?                                                                                                                                                                                                         | 6                  |
| Context                          | Describe the Web site (for mailing list/newsgroup) in which the survey was posted. What is the Web site about, who is visiting it, what are visitors normally looking for? Discuss to what degree the content of the Web site could pre-select the sample or influence the results. For example, a survey about vaccination on a anti-immunization Web site will have different results from a Web survey conducted on a government Web site | n/a                |
| Mandatory/voluntary              | Was it a mandatory survey to be filled in by every visitor who wanted to enter the Web site, or was it a voluntary survey?                                                                                                                                                                                                                                                                                                                   | n/a                |
| Incentives                       | Were any incentives offered (eg, monetary, prizes, or non-monetary incentives such as an offer to provide the survey results)?                                                                                                                                                                                                                                                                                                               | n/a                |

|    |                                                                                                           |                                                                                                                                                                                                                                                                                                                                                                                                                                                                                               |     |
|----|-----------------------------------------------------------------------------------------------------------|-----------------------------------------------------------------------------------------------------------------------------------------------------------------------------------------------------------------------------------------------------------------------------------------------------------------------------------------------------------------------------------------------------------------------------------------------------------------------------------------------|-----|
| 1  | Time/Date                                                                                                 | In what timeframe were the data collected?                                                                                                                                                                                                                                                                                                                                                                                                                                                    | 6   |
| 2  | Randomization of items or questionnaires                                                                  | To prevent biases items can be randomized or alternated.                                                                                                                                                                                                                                                                                                                                                                                                                                      | n/a |
| 3  | Adaptive questioning                                                                                      | Use adaptive questioning (certain items, or only conditionally displayed based on responses to other items) to reduce number and complexity of the questions.                                                                                                                                                                                                                                                                                                                                 | n/a |
| 4  | Number of Items                                                                                           | What was the number of questionnaire items per page? The number of items is an important factor for the completion rate.                                                                                                                                                                                                                                                                                                                                                                      | 7   |
| 5  | Number of screens (pages)                                                                                 | Over how many pages was the questionnaire distributed? The number of items is an important factor for the completion rate.                                                                                                                                                                                                                                                                                                                                                                    | n/a |
| 6  | Completeness check                                                                                        | It is technically possible to do consistency or completeness checks before the questionnaire is submitted. Was this done, and if "yes", how (usually JavaScript)? An alternative is to check for completeness after the questionnaire has been submitted (and highlight mandatory items). If this has been done, it should be reported. All items should provide a non-response option such as "not applicable" or "rather not say", and selection of one response option should be enforced. | n/a |
| 7  | Review step                                                                                               | State whether respondents were able to review and change their answers (eg, through a Back button or a Review step which displays a summary of the responses and asks the respondents if they are correct).                                                                                                                                                                                                                                                                                   | 6   |
| 8  | Unique site visitor                                                                                       | If you provide view rates or participation rates, you need to define how you determined a unique visitor. There are different techniques available, based on IP addresses or cookies or both.                                                                                                                                                                                                                                                                                                 | n/a |
| 9  | View rate (Ratio of unique survey visitors/unique site visitors)                                          | Requires counting unique visitors to the first page of the survey, divided by the number of unique site visitors (not page views!). It is not unusual to have view rates of less than 0.1 % if the survey is voluntary.                                                                                                                                                                                                                                                                       | n/a |
| 10 | Participation rate (Ratio of unique visitors who agreed to participate/unique first survey page visitors) | Count the unique number of people who filled in the first survey page (or agreed to participate, for example by checking a checkbox), divided by visitors who visit the first page of the survey (or the informed consents page, if present). This can also be called "recruitment" rate.                                                                                                                                                                                                     | n/a |
| 11 | Completion rate (Ratio of users who finished the survey/users who                                         | The number of people submitting the last questionnaire page, divided by the number of people who agreed to participate (or submitted the first survey page). This is only relevant if there is a separate "informed consent" page or if the survey goes over several pages. This is a measure for attrition. Note that                                                                                                                                                                        | 8   |

|    |                                                     |                                                                                                                                                                                                                                                                                                                                                                                                                                                                                                                                                                            |     |
|----|-----------------------------------------------------|----------------------------------------------------------------------------------------------------------------------------------------------------------------------------------------------------------------------------------------------------------------------------------------------------------------------------------------------------------------------------------------------------------------------------------------------------------------------------------------------------------------------------------------------------------------------------|-----|
| 1  | agreed to participate)                              | "completion" can involve leaving questionnaire items blank. This is not a measure for how completely questionnaires were filled in. (If you need a measure for this, use the word "completeness rate".)                                                                                                                                                                                                                                                                                                                                                                    |     |
| 2  | 3                                                   | 4                                                                                                                                                                                                                                                                                                                                                                                                                                                                                                                                                                          | 5   |
| 6  | Cookies used                                        | Indicate whether cookies were used to assign a unique user identifier to each client computer. If so, mention the page on which the cookie was set and read, and how long the cookie was valid. Were duplicate entries avoided by preventing users access to the survey twice; or were duplicate database entries having the same user ID eliminated before analysis? In the latter case, which entries were kept for analysis (eg, the first entry or the most recent)?                                                                                                   | n/a |
| 7  | 8                                                   | 9                                                                                                                                                                                                                                                                                                                                                                                                                                                                                                                                                                          | 10  |
| 11 | IP check                                            | Indicate whether the IP address of the client computer was used to identify potential duplicate entries from the same user. If so, mention the period of time for which no two entries from the same IP address were allowed (eg, 24 hours). Were duplicate entries avoided by preventing users with the same IP address access to the survey twice; or were duplicate database entries having the same IP address within a given period of time eliminated before analysis? If the latter, which entries were kept for analysis (eg, the first entry or the most recent)? | n/a |
| 12 | 13                                                  | 14                                                                                                                                                                                                                                                                                                                                                                                                                                                                                                                                                                         | 15  |
| 16 | Log file analysis                                   | Indicate whether other techniques to analyze the log file for identification of multiple entries were used. If so, please describe.                                                                                                                                                                                                                                                                                                                                                                                                                                        | n/a |
| 17 | 18                                                  | 19                                                                                                                                                                                                                                                                                                                                                                                                                                                                                                                                                                         | 20  |
| 21 | Registration                                        | In "closed" (non-open) surveys, users need to login first and it is easier to prevent duplicate entries from the same user. Describe how this was done. For example, was the survey never displayed a second time once the user had filled it in, or was the username stored together with the survey results and later eliminated? If the latter, which entries were kept for analysis (eg, the first entry or the most recent)?                                                                                                                                          | n/a |
| 22 | 23                                                  | 24                                                                                                                                                                                                                                                                                                                                                                                                                                                                                                                                                                         | 25  |
| 26 | Handling of incomplete questionnaires               | Were only completed questionnaires analyzed? Were questionnaires which terminated early (where, for example, users did not go through all questionnaire pages) also analyzed?                                                                                                                                                                                                                                                                                                                                                                                              | 7   |
| 27 | 28                                                  | 29                                                                                                                                                                                                                                                                                                                                                                                                                                                                                                                                                                         | 30  |
| 31 | Questionnaires submitted with an atypical timestamp | Some investigators may measure the time people needed to fill in a questionnaire and exclude questionnaires that were submitted too soon. Specify the timeframe that was used as a cut-off point, and describe how this point was determined.                                                                                                                                                                                                                                                                                                                              | n/a |
| 32 | 33                                                  | 34                                                                                                                                                                                                                                                                                                                                                                                                                                                                                                                                                                         | 35  |
| 36 | Statistical correction                              | Indicate whether any methods such as weighting of items or propensity scores have been used to adjust for the non-representative sample; if so, please describe the methods.                                                                                                                                                                                                                                                                                                                                                                                               | n/a |
| 37 | 38                                                  | 39                                                                                                                                                                                                                                                                                                                                                                                                                                                                                                                                                                         | 40  |
| 41 | 42                                                  | 43                                                                                                                                                                                                                                                                                                                                                                                                                                                                                                                                                                         | 44  |
| 45 | 46                                                  |                                                                                                                                                                                                                                                                                                                                                                                                                                                                                                                                                                            |     |

This checklist has been modified from Eysenbach G. Improving the quality of Web surveys: the Checklist for Reporting Results of Internet E-Surveys (CHERRIES). J Med Internet Res. 2004 Sep 29;6(3):e34 [erratum in J Med Internet Res. 2012; 14(1): e8.]. Article available at <https://www.jmir.org/2004/3/e34/>; erratum available <https://www.jmir.org/2012/1/e8/>. Copyright ©Gunther Eysenbach. Originally published in the [Journal of Medical Internet Research](https://www.jmir.org/2004/3/e34/), 29.9.2004 and 04.01.2012.

1  
2  
3  
4  
5  
6  
7  
8  
9  
10  
11  
12  
13  
14  
15  
16  
17  
18  
19  
20  
21  
22  
23  
24  
25  
26  
27  
28  
29  
30  
31  
32  
33  
34  
35  
36  
37  
38  
39  
40  
41  
42  
43  
44  
45  
46

This is an open-access article distributed under the terms of the Creative Commons Attribution License (<https://creativecommons.org/licenses/by/2.0/>), which permits unrestricted use, distribution, and reproduction in any medium, provided the original work, first published in the Journal of Medical Internet Research, is properly cited.

For peer review only

# BMJ Open

## Sociodemographic differences in patient experience with primary care during COVID-19

|                                 |                                                                                                                                                                                                                                                                                                                                                                                                                                                                                                                                                                                                                                                                                                                                                                                                                                                                                                                                                                                                                                                                                                                                                                                                                                                                                                                                                                                                                                                                                                                                                                                                                                                                                                                                                                                                                                                                                                                                                                                                                |
|---------------------------------|----------------------------------------------------------------------------------------------------------------------------------------------------------------------------------------------------------------------------------------------------------------------------------------------------------------------------------------------------------------------------------------------------------------------------------------------------------------------------------------------------------------------------------------------------------------------------------------------------------------------------------------------------------------------------------------------------------------------------------------------------------------------------------------------------------------------------------------------------------------------------------------------------------------------------------------------------------------------------------------------------------------------------------------------------------------------------------------------------------------------------------------------------------------------------------------------------------------------------------------------------------------------------------------------------------------------------------------------------------------------------------------------------------------------------------------------------------------------------------------------------------------------------------------------------------------------------------------------------------------------------------------------------------------------------------------------------------------------------------------------------------------------------------------------------------------------------------------------------------------------------------------------------------------------------------------------------------------------------------------------------------------|
| Journal:                        | <i>BMJ Open</i>                                                                                                                                                                                                                                                                                                                                                                                                                                                                                                                                                                                                                                                                                                                                                                                                                                                                                                                                                                                                                                                                                                                                                                                                                                                                                                                                                                                                                                                                                                                                                                                                                                                                                                                                                                                                                                                                                                                                                                                                |
| Manuscript ID                   | bmjopen-2021-056868.R1                                                                                                                                                                                                                                                                                                                                                                                                                                                                                                                                                                                                                                                                                                                                                                                                                                                                                                                                                                                                                                                                                                                                                                                                                                                                                                                                                                                                                                                                                                                                                                                                                                                                                                                                                                                                                                                                                                                                                                                         |
| Article Type:                   | Original research                                                                                                                                                                                                                                                                                                                                                                                                                                                                                                                                                                                                                                                                                                                                                                                                                                                                                                                                                                                                                                                                                                                                                                                                                                                                                                                                                                                                                                                                                                                                                                                                                                                                                                                                                                                                                                                                                                                                                                                              |
| Date Submitted by the Author:   | 09-Feb-2022                                                                                                                                                                                                                                                                                                                                                                                                                                                                                                                                                                                                                                                                                                                                                                                                                                                                                                                                                                                                                                                                                                                                                                                                                                                                                                                                                                                                                                                                                                                                                                                                                                                                                                                                                                                                                                                                                                                                                                                                    |
| Complete List of Authors:       | <p>Agarwal, Payal; Women's College Hospital Institute for Health System Solutions and Virtual Care; University of Toronto Department of Family and Community Medicine</p> <p>Wang, Ri; St Michael's Hospital, MAP Centre for Urban Health Solutions</p> <p>Meaney, Christopher; University of Toronto Temerty Faculty of Medicine, Department of Family and Community Medicine</p> <p>Walji, Sakina; University of Toronto Department of Family and Community Medicine; Mount Sinai Academic Family Health Team</p> <p>Damji, Ali; University of Toronto Department of Family and Community Medicine; Credit Valley Family Health Team</p> <p>Gill, Navsheer; Southlake Regional Health Centre; University of Toronto Department of Family and Community Medicine</p> <p>Yip, Gina; University of Toronto Department of Family and Community Medicine; Markham Stouffville Hospital</p> <p>Elman, Debbie; University of Toronto Department of Family and Community Medicine; Sunnybrook Health Sciences Centre, Department of Family and Community Medicine</p> <p>Florindo, Tiffany; University of Toronto, Department of Family and Community Medicine; North York General Hospital</p> <p>Fung, Susanna; University of Toronto, Department of Family and Community Medicine; Scarborough Health Network</p> <p>Witty, Melissa; University of Toronto, Department of Family and Community Medicine; Barrie and Community Family Health Team</p> <p>Pham, Thuy-Nga; University of Toronto, Department of Family and Community Medicine; Toronto East Health Network Michael Garron Hospital</p> <p>Ramji, Noor; University of Toronto, Department of Family and Community Medicine; St Michael's Hospital Department of Family and Community Medicine and St Michael's Academic Family Health Team</p> <p>Kiran, Tara; University of Toronto, Department of Family and Community Medicine; St Michael's Hospital Department of Family and Community Medicine and St Michael's Academic Family Health Team</p> |
| <b>Primary Subject Heading</b>: | General practice / Family practice                                                                                                                                                                                                                                                                                                                                                                                                                                                                                                                                                                                                                                                                                                                                                                                                                                                                                                                                                                                                                                                                                                                                                                                                                                                                                                                                                                                                                                                                                                                                                                                                                                                                                                                                                                                                                                                                                                                                                                             |
| Secondary Subject Heading:      | Communication, Health policy, Patient-centred medicine                                                                                                                                                                                                                                                                                                                                                                                                                                                                                                                                                                                                                                                                                                                                                                                                                                                                                                                                                                                                                                                                                                                                                                                                                                                                                                                                                                                                                                                                                                                                                                                                                                                                                                                                                                                                                                                                                                                                                         |
| Keywords:                       | COVID-19, PRIMARY CARE, Quality in health care < HEALTH SERVICES ADMINISTRATION & MANAGEMENT                                                                                                                                                                                                                                                                                                                                                                                                                                                                                                                                                                                                                                                                                                                                                                                                                                                                                                                                                                                                                                                                                                                                                                                                                                                                                                                                                                                                                                                                                                                                                                                                                                                                                                                                                                                                                                                                                                                   |



1  
2  
3  
4  
5  
6  
7  
8  
9  
10  
11  
12  
13  
14  
15  
16  
17  
18  
19  
20  
21  
22  
23  
24  
25  
26  
27  
28  
29  
30  
31  
32  
33  
34  
35  
36  
37  
38  
39  
40  
41  
42  
43  
44  
45  
46  
47  
48  
49  
50  
51  
52  
53  
54  
55  
56  
57  
58  
59  
60

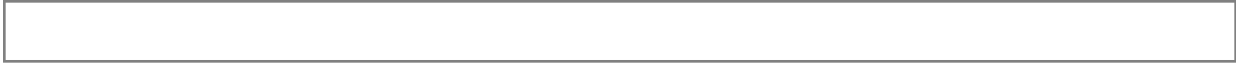

SCHOLARONE™  
Manuscripts



I, the Submitting Author has the right to grant and does grant on behalf of all authors of the Work (as defined in the below author licence), an exclusive licence and/or a non-exclusive licence for contributions from authors who are: i) UK Crown employees; ii) where BMJ has agreed a CC-BY licence shall apply, and/or iii) in accordance with the terms applicable for US Federal Government officers or employees acting as part of their official duties; on a worldwide, perpetual, irrevocable, royalty-free basis to BMJ Publishing Group Ltd ("BMJ") its licensees and where the relevant Journal is co-owned by BMJ to the co-owners of the Journal, to publish the Work in this journal and any other BMJ products and to exploit all rights, as set out in our [licence](#).

The Submitting Author accepts and understands that any supply made under these terms is made by BMJ to the Submitting Author unless you are acting as an employee on behalf of your employer or a postgraduate student of an affiliated institution which is paying any applicable article publishing charge ("APC") for Open Access articles. Where the Submitting Author wishes to make the Work available on an Open Access basis (and intends to pay the relevant APC), the terms of reuse of such Open Access shall be governed by a Creative Commons licence – details of these licences and which [Creative Commons](#) licence will apply to this Work are set out in our licence referred to above.

Other than as permitted in any relevant BMJ Author's Self Archiving Policies, I confirm this Work has not been accepted for publication elsewhere, is not being considered for publication elsewhere and does not duplicate material already published. I confirm all authors consent to publication of this Work and authorise the granting of this licence.

1  
2  
3 **Sociodemographic differences in patient experience with primary care during COVID-19**  
4  
5

6  
7 Payal Agarwal<sup>1,2</sup> MD  
8

9  
10 Rick Wang<sup>3</sup> MMath  
11

12  
13 Christopher Meaney<sup>1</sup> MSc  
14

15  
16 Sakina Walji<sup>1</sup> MD  
17

18  
19 Ali Damji<sup>1</sup> MD  
20

21  
22 Navsheer Gill Toor<sup>1</sup> MD  
23

24  
25 Gina Yip<sup>1</sup> MD  
26

27  
28 Debbie Elman<sup>1</sup> MD  
29

30  
31 Tiffiany Florindo<sup>1</sup> MD  
32

33  
34 Susanna Fung<sup>1</sup> MD  
35

36  
37 Melissa Witty<sup>1</sup> MD  
38

39  
40 Thuy Nga Pham<sup>1</sup> MD  
41

42  
43 Noor Ramji<sup>1,4</sup> MD  
44

45  
46 Tara Kiran<sup>1,3,4,5</sup> MD, MSc  
47

48  
49  
50  
51  
52  
53 <sup>1</sup>Department of Family and Community Medicine, Temerty Faculty of Medicine, University  
54 of Toronto, Toronto, Ontario, Canada  
55

1  
2  
3 <sup>2</sup>Women's College Hospital Institute for Health System Solutions and Virtual Care, Women's  
4 College Hospital, Toronto, Ontario, Canada  
5

6  
7 <sup>3</sup>MAP Centre for Urban Health Solutions, Li Ka Shing Knowledge Institute, St. Michael's  
8 Hospital, Toronto, Canada  
9

10  
11 <sup>4</sup>Department of Family and Community Medicine, St. Michael's Hospital, Toronto, Ontario,  
12 Canada

13  
14 <sup>5</sup>Institute of Health Policy, Management and Evaluation, University of Toronto, Toronto,  
15 Ontario, Canada  
16

17  
18  
19 **Corresponding author:**

20 Tara Kiran, MD, MSc, MAP Centre for Urban Health Solutions, St. Michael's Hospital, Unity  
21 Health Toronto, 30 Bond St., Toronto, ON Canada M5B 1W8  
22 [tara.kiran@utoronto.ca](mailto:tara.kiran@utoronto.ca), phone 416-864-3011, fax 416-864-3099  
23

24  
25 **Keywords:** COVID-19, Primary Care, Quality in health care, Health services administration &  
26 management  
27  
28

29  
30 **Manuscript Word Count:** 2477  
31  
32  
33  
34  
35  
36  
37  
38  
39  
40  
41  
42  
43  
44  
45  
46  
47  
48  
49  
50  
51  
52  
53  
54  
55  
56  
57  
58  
59  
60

1  
2  
3  
4  
5  
6  
7  
8  
9  
10  
11  
12  
13  
14  
15  
16  
17  
18  
19  
20  
21  
22  
23  
24  
25  
26  
27  
28  
29  
30  
31  
32  
33  
34  
35  
36  
37  
38  
39  
40  
41  
42  
43  
44  
45  
46  
47  
48  
49  
50  
51  
52  
53  
54  
55  
56  
57  
58  
59  
60

For peer review only

**ABSTRACT**

**Purpose:** We sought to understand patients’ care-seeking behaviours early in the pandemic, their use and views of different virtual care modalities, and whether these differed by sociodemographic factors.

1  
2  
3  
4 **Methods:** We conducted a multi-site cross-sectional patient experience survey at thirteen  
5  
6  
7 academic primary care teaching practices between May and June of 2020. An anonymized link  
8  
9  
10 to an electronic survey was sent to a subset of patients with a valid email address on file;  
11  
12  
13 sampling was based on birth month. For each question, the proportion of respondents who  
14  
15  
16 selected each response was calculated, followed by a comparison by sociodemographic  
17  
18  
19 characteristics using chi-squared tests.  
20  
21

22  
23  
24 **Results:** In total, 7482 participants responded to the survey. Most received care from their  
25  
26  
27 primary care clinic during the pandemic (67.7%, 5068/7482), the majority via phone (82.5%,  
28  
29  
30 4195/5086). Among those who received care, 30.53% (1509/4943) stated that they delayed  
31  
32  
33 seeking care because of the pandemic. Most participants reported a high degree of comfort with  
34  
35  
36 phone (92.4%, 3824/4139), video (95.2%, 238/250) and email or messaging (91.3%, 794/870).  
37  
38  
39 However, those reporting difficulty making ends meet, poor or fair health, and arriving in  
40  
41  
42 Canada in the last 10 years reported lower levels of comfort with virtual care and fewer wanted  
43  
44  
45 their practice to continue offering virtual options after the pandemic.  
46  
47  
48

49  
50 **Conclusions:** Our study suggest that newcomers, people living with a lower income, and those  
51  
52  
53 reporting poor or fair health have a stronger preference and comfort for in-person primary care.  
54  
55  
56  
57  
58  
59  
60

1  
2  
3  
4 Further research should explore potential barriers to virtual care and how these could be  
5  
6  
7 addressed.  
8  
9  
10  
11  
12

## 13 **ARTICLE SUMMARY**

### 14 **Strengths and Limitations of this study**

- 15  
16  
17  
18  
19  
20 • Our study included a large sample of respondents from multiple clinics across both urban and  
21  
22  
23  
24  
25  
26  
27  
28  
29  
30  
31  
32  
33  
34  
35  
36  
37  
38  
39  
40  
41  
42  
43  
44  
45  
46  
47  
48  
49  
50  
51  
52  
53  
54  
55  
56  
57  
58  
59  
60  
61  
62  
63  
64  
65  
66  
67  
68  
69  
70  
71  
72  
73  
74  
75  
76  
77  
78  
79  
80  
81  
82  
83  
84  
85  
86  
87  
88  
89  
90  
91  
92  
93  
94  
95  
96  
97  
98  
99  
100  
101  
102  
103  
104  
105  
106  
107  
108  
109  
110  
111  
112  
113  
114  
115  
116  
117  
118  
119  
120  
121  
122  
123  
124  
125  
126  
127  
128  
129  
130  
131  
132  
133  
134  
135  
136  
137  
138  
139  
140  
141  
142  
143  
144  
145  
146  
147  
148  
149  
150  
151  
152  
153  
154  
155  
156  
157  
158  
159  
160  
161  
162  
163  
164  
165  
166  
167  
168  
169  
170  
171  
172  
173  
174  
175  
176  
177  
178  
179  
180  
181  
182  
183  
184  
185  
186  
187  
188  
189  
190  
191  
192  
193  
194  
195  
196  
197  
198  
199  
200  
201  
202  
203  
204  
205  
206  
207  
208  
209  
210  
211  
212  
213  
214  
215  
216  
217  
218  
219  
220  
221  
222  
223  
224  
225  
226  
227  
228  
229  
230  
231  
232  
233  
234  
235  
236  
237  
238  
239  
240  
241  
242  
243  
244  
245  
246  
247  
248  
249  
250  
251  
252  
253  
254  
255  
256  
257  
258  
259  
260  
261  
262  
263  
264  
265  
266  
267  
268  
269  
270  
271  
272  
273  
274  
275  
276  
277  
278  
279  
280  
281  
282  
283  
284  
285  
286  
287  
288  
289  
290  
291  
292  
293  
294  
295  
296  
297  
298  
299  
300  
301  
302  
303  
304  
305  
306  
307  
308  
309  
310  
311  
312  
313  
314  
315  
316  
317  
318  
319  
320  
321  
322  
323  
324  
325  
326  
327  
328  
329  
330  
331  
332  
333  
334  
335  
336  
337  
338  
339  
340  
341  
342  
343  
344  
345  
346  
347  
348  
349  
350  
351  
352  
353  
354  
355  
356  
357  
358  
359  
360  
361  
362  
363  
364  
365  
366  
367  
368  
369  
370  
371  
372  
373  
374  
375  
376  
377  
378  
379  
380  
381  
382  
383  
384  
385  
386  
387  
388  
389  
390  
391  
392  
393  
394  
395  
396  
397  
398  
399  
400  
401  
402  
403  
404  
405  
406  
407  
408  
409  
410  
411  
412  
413  
414  
415  
416  
417  
418  
419  
420  
421  
422  
423  
424  
425  
426  
427  
428  
429  
430  
431  
432  
433  
434  
435  
436  
437  
438  
439  
440  
441  
442  
443  
444  
445  
446  
447  
448  
449  
450  
451  
452  
453  
454  
455  
456  
457  
458  
459  
460  
461  
462  
463  
464  
465  
466  
467  
468  
469  
470  
471  
472  
473  
474  
475  
476  
477  
478  
479  
480  
481  
482  
483  
484  
485  
486  
487  
488  
489  
490  
491  
492  
493  
494  
495  
496  
497  
498  
499  
500  
501  
502  
503  
504  
505  
506  
507  
508  
509  
510  
511  
512  
513  
514  
515  
516  
517  
518  
519  
520  
521  
522  
523  
524  
525  
526  
527  
528  
529  
530  
531  
532  
533  
534  
535  
536  
537  
538  
539  
540  
541  
542  
543  
544  
545  
546  
547  
548  
549  
550  
551  
552  
553  
554  
555  
556  
557  
558  
559  
560  
561  
562  
563  
564  
565  
566  
567  
568  
569  
570  
571  
572  
573  
574  
575  
576  
577  
578  
579  
580  
581  
582  
583  
584  
585  
586  
587  
588  
589  
590  
591  
592  
593  
594  
595  
596  
597  
598  
599  
600  
601  
602  
603  
604  
605  
606  
607  
608  
609  
610  
611  
612  
613  
614  
615  
616  
617  
618  
619  
620  
621  
622  
623  
624  
625  
626  
627  
628  
629  
630  
631  
632  
633  
634  
635  
636  
637  
638  
639  
640  
641  
642  
643  
644  
645  
646  
647  
648  
649  
650  
651  
652  
653  
654  
655  
656  
657  
658  
659  
660  
661  
662  
663  
664  
665  
666  
667  
668  
669  
670  
671  
672  
673  
674  
675  
676  
677  
678  
679  
680  
681  
682  
683  
684  
685  
686  
687  
688  
689  
690  
691  
692  
693  
694  
695  
696  
697  
698  
699  
700  
701  
702  
703  
704  
705  
706  
707  
708  
709  
710  
711  
712  
713  
714  
715  
716  
717  
718  
719  
720  
721  
722  
723  
724  
725  
726  
727  
728  
729  
730  
731  
732  
733  
734  
735  
736  
737  
738  
739  
740  
741  
742  
743  
744  
745  
746  
747  
748  
749  
750  
751  
752  
753  
754  
755  
756  
757  
758  
759  
760  
761  
762  
763  
764  
765  
766  
767  
768  
769  
770  
771  
772  
773  
774  
775  
776  
777  
778  
779  
780  
781  
782  
783  
784  
785  
786  
787  
788  
789  
790  
791  
792  
793  
794  
795  
796  
797  
798  
799  
800  
801  
802  
803  
804  
805  
806  
807  
808  
809  
810  
811  
812  
813  
814  
815  
816  
817  
818  
819  
820  
821  
822  
823  
824  
825  
826  
827  
828  
829  
830  
831  
832  
833  
834  
835  
836  
837  
838  
839  
840  
841  
842  
843  
844  
845  
846  
847  
848  
849  
850  
851  
852  
853  
854  
855  
856  
857  
858  
859  
860  
861  
862  
863  
864  
865  
866  
867  
868  
869  
870  
871  
872  
873  
874  
875  
876  
877  
878  
879  
880  
881  
882  
883  
884  
885  
886  
887  
888  
889  
890  
891  
892  
893  
894  
895  
896  
897  
898  
899  
900  
901  
902  
903  
904  
905  
906  
907  
908  
909  
910  
911  
912  
913  
914  
915  
916  
917  
918  
919  
920  
921  
922  
923  
924  
925  
926  
927  
928  
929  
930  
931  
932  
933  
934  
935  
936  
937  
938  
939  
940  
941  
942  
943  
944  
945  
946  
947  
948  
949  
950  
951  
952  
953  
954  
955  
956  
957  
958  
959  
960  
961  
962  
963  
964  
965  
966  
967  
968  
969  
970  
971  
972  
973  
974  
975  
976  
977  
978  
979  
980  
981  
982  
983  
984  
985  
986  
987  
988  
989  
990  
991  
992  
993  
994  
995  
996  
997  
998  
999  
1000
- Patients were randomly sampled using birth month; however, our findings are open to selection bias because of the response rate, mode of delivery (email), and the survey being offered primarily in English.
- Demographics of our sample confirm that we reached a diverse group of patients.
- Survey questions were relevant to COVID-19 and informed by primary care leaders and patients.
- Our survey reports on experience during the early phase of the pandemic and patients' comfort and preferences may have evolved since.

## 55 **INTRODUCTION**

1  
2  
3  
4 The COVID-19 pandemic has dramatically shifted the way health care is delivered and  
5  
6  
7 experienced by patients in many developed nations. Primary care practices in Canada, the US  
8  
9  
10 and elsewhere, rapidly switched to a virtual first approach—including the use of video, phone  
11  
12  
13 and secure messaging—to limit transmission of the SARS-CoV2 virus and conserve Personal  
14  
15  
16 Protective Equipment<sup>1,2,3,4,5</sup>. A study from Ontario, Canada found that shortly after the pandemic  
17  
18  
19 was declared, in-office visits reduced by 79% and virtual care conducted by phone or video  
20  
21  
22 increased 56-fold, comprising 71% of primary care physician visits<sup>6</sup>. While this approach  
23  
24  
25 supported immediate public health goals, its impact on access, receipt of patient centered  
26  
27  
28 evidence-based care, and longer -term health outcomes is unclear<sup>7</sup>. As health systems consider  
29  
30  
31 what the “new normal” should look like, an examination of these impacts will be crucial.  
32  
33  
34  
35  
36  
37  
38  
39  
40  
41  
42  
43  
44  
45  
46  
47  
48  
49  
50  
51  
52  
53  
54  
55  
56  
57  
58  
59  
60

This shift in care delivery has raised several concerns, including potential negative impacts on  
patient experience and access. Clinicians have noted anecdotally that patients with worrisome  
symptoms are delaying care<sup>8</sup>. Some note that the switch to virtual care may make care more  
accessible<sup>9-12</sup>, while others have highlighted barriers certain populations face in accessing virtual  
care<sup>13-16</sup>. Prior studies suggest patient characteristics including older age and lower income may



1  
2  
3 limit one's ability to benefit from digital health and virtual care services<sup>17-18</sup>. In addition, patients  
4  
5  
6  
7 may not have access to required technologies such as a phone or internet access<sup>19-20</sup>. Despite this,  
8  
9  
10 very little literature to date is available on patient experiences during the COVID-19 pandemic  
11  
12  
13 and how these differ by sociodemographic characteristics. Most existing studies on patient  
14  
15  
16  
17 experience during COVID-19 are from acute care, and do not stratify experience based on  
18  
19  
20 patient demographics<sup>21-25</sup>.  
21  
22  
23  
24  
25  
26

27 We conducted a patient survey at multiple academic primary care clinics in Ontario, Canada to  
28  
29  
30 better understand patient experience during COVID-19. We were interested in patients' care-  
31  
32  
33 seeking behaviours, their use and views of different virtual care modalities, and whether these  
34  
35  
36  
37 differed by sociodemographic factors.  
38  
39  
40  
41  
42  
43

## 44 **METHODS**

### 45 46 47 **Study design and setting** 48 49

50 We conducted a multi-site cross-sectional survey to understand patient experience during the  
51  
52  
53 COVID-19 pandemic at thirteen core teaching practices affiliated with the University of Toronto  
54  
55  
56  
57  
58  
59  
60

1  
2  
3  
4 Department of Family and Community Medicine situated in the Greater Toronto Area, a large,  
5  
6  
7 demographically diverse metropolitan area with more than 250 different ethnicities and half of  
8  
9  
10 all residents being foreign-born<sup>26-27</sup>. Participating practices were located in Toronto and  
11  
12  
13 surrounding areas including Mississauga, Markham, and Barrie. Practices range in size from  
14  
15  
16 roughly 11 physicians serving 14,000 patients to 80 physicians serving 50,000 patients; some  
17  
18  
19 have multiple locations; one provides services in English and French. Physicians in all teaching  
20  
21  
22 practices are part of Family Health Organizations and formally enroll patients, have shared  
23  
24  
25 responsibility for after-hours care, and are paid primarily by age-sex adjusted capitation; twelve  
26  
27  
28 of the thirteen sites were part of Family Health Teams that included non-physician health  
29  
30  
31 professionals such as nurses, nurse practitioners, social workers and dieticians.  
32  
33  
34  
35  
36  
37  
38  
39  
40  
41  
42  
43  
44  
45  
46  
47  
48  
49  
50  
51  
52  
53  
54

40 The survey in an ongoing effort to directly inform quality improvement (QI) efforts at  
41  
42  
43 participating sites during COVID-19. The initiative was formally reviewed by institutional  
44  
45  
46  
47 authorities at Unity Health Toronto and deemed to neither require Research Ethics Board  
48  
49  
50 approval nor written informed consent from participants.  
51  
52  
53  
54

### 55 **Study Population and Recruitment**

56  
57  
58  
59  
60

1  
2  
3  
4 A link to an open electronic patient experience survey is emailed every quarter to a subset of  
5  
6  
7 patients with a valid email address on file; sampling each quarter is based on birth month with all  
8  
9  
10 eligible patients receiving a survey in a given year. The current analysis summarizes results of  
11  
12  
13 the first survey, which was sent to patients with birthday during the months of March, April or  
14  
15  
16 May of 2020. They were sent the survey between May and June of 2020 which corresponded  
17  
18  
19 with the end of the first wave of COVID-19 in the Toronto region<sup>28</sup>. Each site distributed an  
20  
21  
22 anonymized link to patients in the manner by which they usually communicate electronically to  
23  
24  
25 patients (i.e. by email or using a secure messaging service). In some cases, the email address on  
26  
27  
28 file may belong to a family member or caregiver to allow them the option of filling out the  
29  
30  
31 survey on behalf of the patient. Recruitment was done in English, with one site also doing  
32  
33  
34 recruitment and survey completion in French. No incentives were provided to participants.  
35  
36  
37  
38  
39  
40  
41  
42  
43

#### 44 **Survey Design**

45  
46  
47 The survey was developed collaboratively by the family physicians who had a QI leadership role  
48  
49  
50 at participating sites, to support quality improvement efforts related to the COVID-19 pandemic.  
51  
52

53  
54 Where possible, questions were informed by existing surveys including the Commonwealth Fund  
55  
56  
57  
58  
59  
60

1  
2  
3  
4 International Health Policy Survey<sup>29-30</sup> and the Ontario Primary Care Experience Survey, which  
5  
6  
7 was developed as part of a larger Primary Care Performance Measurement strategy to measure  
8  
9  
10 the performance across 9 domains<sup>31-32</sup>. The survey went through several iterations based on  
11  
12  
13 feedback from practice QI teams, a survey methodologist, a biostatistician, patient education and  
14  
15  
16 engagement specialists, and patient and family advisors. A paragraph at the start of the survey  
17  
18  
19 outlined the purpose of the survey, the reason they were being asked to participate, and  
20  
21  
22 highlighted that the survey was voluntary and anonymous. The final survey was prepared in  
23  
24  
25  
26  
27 Qualtrics software, a digital platform to capture experience data, and included 43 potential  
28  
29  
30 questions over 5 thematic domains including: 1) seeking and delaying care, 2) use and comfort  
31  
32  
33 with virtual care, 3) urgent care access, 4) patient centeredness and 5) patient demographic and  
34  
35  
36 contextual factors. Participants could end the survey at any point and were able to review  
37  
38  
39 previously answered questions before submission. (See Supplementary file 1 for full survey)  
40  
41  
42  
43  
44

### 45 **Data Collection and Storage**

46  
47

48 Data collected via the electronic survey were stored on Qualtrics. All data was downloaded onto  
49  
50  
51 a secure research server at the University of Toronto. A script was run to remove any potentially  
52  
53  
54 identifying information including 1) IP addresses, 2) Email address, 3) longitude/latitude  
55  
56  
57  
58  
59  
60

1  
2  
3  
4 coordinates and 4) any free text fields (which may contain unstructured protected health  
5  
6  
7 information).

## 13 **Statistical Analysis**

14  
15  
16  
17 We performed an initial descriptive statistics analysis on the responses of all participants across  
18  
19  
20 all sites who answered at least one question in the survey. For each question, we calculated the  
21  
22  
23 proportion of respondents who selected each response. We then compared patient responses by  
24  
25  
26 sociodemographic characteristics including age, gender, education, self-reported financial issues,  
27  
28  
29 immigration status, primary language, self-reported health, and usual primary care provider  
30  
31  
32 (PCP). P values were calculated using chi-squared tests and all data analysis was conducted  
33  
34  
35  
36  
37 using R version 4.0.

## 43 **RESULTS**

44  
45  
46  
47 The survey link was emailed to 32,307 patients at 13 practices (see Supplementary file 2). We  
48  
49  
50 presented sociodemographic data (Table 1) on the 7482 participants who answered one or more  
51  
52  
53 questions in the survey (23.3% response rate). Sixty-five percent of respondents were female  
54  
55  
56  
57  
58  
59  
60

1  
2  
3  
4 (4379/6713) and 78.3% (5159/6588) reported having a college, university or graduate degree.  
5  
6

7 Nine percent of respondents (590/6556) reported trouble making ends meet at the end of the  
8  
9  
10 month, while 29.0% (1928/6656) were not born in Canada (with 16.9% of these having arrived  
11  
12  
13 in the last 10 years). Eight percent (553/6851) reported filling out the survey on behalf of a  
14  
15  
16 family member. Fifty-five surveys were completed in French.  
17  
18  
19  
20  
21  
22  
23

#### 24 **Care-seeking during COVID-19**

25  
26

27 Of all respondents, 67.7% (5068/7482) reported they received care in some way from their  
28  
29  
30 primary care clinic since the start of the pandemic. Financial status and self-reported health were  
31  
32  
33 significantly associated with care seeking behaviours during the pandemic ( $p < 0.001$ ); a higher  
34  
35  
36 proportion of patients who noted trouble making ends meet (yes: 74.8%, 441/590, no: 65.3%,  
37  
38  
39 3396/5201, prefer not to answer: 68.0%, 520/765) and those with lower self-rated health (fair or  
40  
41  
42 poor: 76.9%, 752/978, excellent: 59.8%, 599/1002) reported receiving care during the study  
43  
44  
45 period. Of the 32.3% (2414/7482) of patients who did not receive care during the study period,  
46  
47  
48 the most commonly cited reasons were that patients had no health need (72.4%) and patients  
49  
50  
51 were worried about safety (9.5%).  
52  
53  
54  
55  
56  
57  
58  
59  
60

1  
2  
3  
4  
5  
6  
7 Of the 5068 patients who reported receiving care at their primary care practice during the  
8  
9  
10 pandemic, 30.5% (1509/4943) stated that they delayed seeking care because of the pandemic.  
11

12  
13 Gender, age, education level, financial status and self-reported health status were significantly  
14  
15 associated with differences in seeking care ( $p < 0.05$  for all); for example, a higher proportion of  
16  
17 those with trouble making ends meet and those with lower self-rated health reported delays in  
18  
19 seeking care (see Table 2).  
20  
21  
22  
23  
24  
25  
26  
27  
28  
29

### 30 **Use and perceptions of virtual care**

31  
32  
33 Eighty-two (4195/5086) percent of participants reported receiving care by phone, 30.5%  
34  
35 (1553/5086) in-person, 17.4% (886/5086) via email or secure messaging, and 5.1% (260/5086)  
36  
37 via video. Age, immigration status and self-rated health were significantly associated with  
38  
39 differences in receiving in person care ( $p < 0.05$  for all); the proportion who reported receiving in-  
40  
41 person care was lower among those over the age of 65, those not born in Canada and those with  
42  
43 lower self-rated health (Table 3). Women, young adults, those who rate their health as fair or  
44  
45 poor and those who reported trouble making ends meet reported higher rates of phone use (see  
46  
47  
48  
49  
50  
51  
52  
53  
54  
55  
56  
57  
58  
59  
60

1  
2  
3  
4 Table 3). Age and education level were significantly associated with differences in using email  
5  
6  
7 and secure messaging ( $p < 0.001$  for all); those over the age of 65 (16.9%, 269/1592) and those  
8  
9  
10 with a high school degree or less (13.5%, 130/962) reported less use of email and secure  
11  
12  
13 messaging relative to other groups.  
14  
15

16  
17  
18  
19  
20 Overall, most respondents indicated they were extremely or somewhat comfortable with the  
21  
22  
23 privacy and security of virtual modalities including phone (92.4%, 3824/4139), video (95.2%,  
24  
25  
26 238/250) and email or secure messaging (91.3%, 794/870). Financial status, immigration status  
27  
28  
29 and self-reported health status were significantly associated with differences in comfort with  
30  
31  
32 virtual care use ( $p < 0.05$  for all); those having trouble making ends meet, those not born in  
33  
34  
35 Canada and those rating their health as fair or poor reported lower levels of comfort with phone  
36  
37  
38 calls and email or secure messaging relative to other groups (see Table 4).  
39  
40  
41  
42  
43  
44  
45  
46

#### 47 **Future preferences for virtual care**

48  
49

50 Seventy-five percent (3798/5068), 52.2% (2644/5068), and 42.9% (2172/5068) of respondents  
51  
52  
53 said they wanted their practice to continue offering phone, email/secure messaging, and video  
54  
55  
56  
57  
58  
59  
60



1  
2  
3 after the pandemic, respectively. Age, education status, financial status, immigration status and  
4  
5  
6 self-reported health status were significantly associated with differences in wanting ongoing use  
7  
8  
9  
10 of each of the three virtual care modalities ( $p < 0.05$  for all); those over age 65, those whose  
11  
12  
13 education was high school or less, those reporting yes or “I don’t know” when asked about  
14  
15  
16 difficulty making ends meet, those born outside Canada, and those in fair or poor health reported  
17  
18  
19 the lowest desire for the three virtual care modalities to continue after the pandemic compared to  
20  
21  
22 other groups (see Table 5).  
23  
24  
25  
26  
27  
28  
29

## 30 DISCUSSION

31  
32  
33 Our analysis of more than 7400 patient experience surveys across 13 primary care clinics during  
34  
35  
36 the first months of the COVID-19 pandemic found important differences in care-seeking and  
37  
38  
39 comfort with virtual care based on patient income, self-reported health, and other demographic  
40  
41  
42 characteristics. Most participants received care from their primary care clinic in some way during  
43  
44  
45 the study period; however, almost a third who sought care reported they delayed it due to  
46  
47  
48 concerns about the pandemic. Patients who had trouble making ends meet and those who  
49  
50  
51 reported their health as fair or poor were more likely to seek care during the pandemic, yet were  
52  
53  
54  
55  
56  
57  
58  
59  
60

1  
2  
3 also more likely to report they delayed seeking care. Patient generally reported a high degree of  
4  
5  
6  
7 comfort with phone, video and email or secure messaging. But, those reporting “yes” or “don’t  
8  
9  
10 know/prefer not to answer” when asked about difficulty making ends meet, poor or fair health,  
11  
12  
13 and arriving in Canada in the last 10 years reported lower levels of comfort and less likely to  
14  
15  
16  
17 want their practice to continue offering these virtual options.  
18  
19  
20  
21  
22  
23

24 Our results, similar to other emerging literature, suggests a complex relationship between the  
25  
26  
27 social determinants of health and patient comfort and preference regarding accessing care  
28  
29  
30 through virtual tools. A US based study prior to the pandemic found that while younger patients  
31  
32  
33 and those with physical disabilities were more likely to use video visits to access care, those who  
34  
35  
36 reported lower incomes and lived in rural populations were less likely to use this modality<sup>33</sup>. A  
37  
38  
39 recent US-based primary care study found that after care shifted to a virtual-first approach during  
40  
41  
42 the pandemic, a significantly smaller proportion of visits overall were with people who were low  
43  
44  
45  
46  
47 income, non-white, or non-English speakers<sup>34</sup>. However, a Canadian based study found that  
48  
49  
50 similar to our participants, those with the highest care needs (older, multiple co-morbidities),  
51  
52  
53  
54  
55  
56  
57  
58  
59  
60

1  
2  
3  
4 were more likely to access primary care during the early months of the pandemic compared to  
5  
6  
7 other groups<sup>6</sup>.  
8  
9

10  
11  
12  
13 As many predict virtual care will continue to be a part of care delivery post-pandemic, this study  
14  
15  
16 highlights the importance of integrating patient experience data into future care delivery  
17  
18  
19 planning. Similar to other recently published data <sup>6,35,36</sup>, our experience data indicates phone was  
20  
21  
22 by far the most utilized modality of virtual care and overall, participants were comfortable using  
23  
24  
25 virtual modalities to receive care. Patients who report financial troubles and poor health, had a  
26  
27  
28 higher percentage reporting accessing care (virtually and in person) during the pandemic  
29  
30  
31 compared to other groups; however, they reported greater concerns with the privacy and security  
32  
33  
34 of virtual care and less desire for virtual care to be an ongoing part of their primary care  
35  
36  
37 experience. This suggests that while public health measures may have pushed populations with  
38  
39  
40 the highest care needs to use virtual care, these modalities did not provide all patients with an  
41  
42  
43 equitable, patient-centered care experience. Further research should explore reasons behind the  
44  
45  
46 relative discomfort and low interest in virtual care and how barriers could be addressed. While  
47  
48  
49 access to technology may be part of this problem, other factors such as health and digital literacy,  
50  
51  
52  
53  
54  
55  
56  
57  
58  
59  
60

1  
2  
3 and support from peers and health care providers may also be significant<sup>37</sup>. Without further  
4  
5  
6 patient experience and demographic data to understand the ongoing use of virtual care, we risk  
7  
8  
9  
10 leaving behind those who need care most.  
11  
12  
13

### 14 15 16 17 **Strengths and Limitations** 18

19  
20 Our study had several key strengths and limitations. Our study included a large sample of  
21  
22  
23 respondents from multiple clinics across both urban and suburban communities. Patients were  
24  
25  
26 randomly sampled using birth month. Survey questions were relevant to COVID-19 and  
27  
28  
29 informed by primary care leaders and patients. However, our findings are open to selection bias  
30  
31  
32 because of the response rate, mode of delivery, and the survey being offered primarily in  
33  
34  
35 English; however, demographics of our sample confirm that we reached a diverse group of  
36  
37  
38 patients. We found substantial differences in utilization and perspectives of virtual care by  
39  
40  
41 sociodemographic characteristics, but these may be an underestimate of true differences. Our  
42  
43  
44 survey reports on experience during the early phase of the pandemic and patients' comfort and  
45  
46  
47 preferences may have evolved since. Finally, although our sample was taken from 13 primary  
48  
49  
50  
51 care practices, these were all academic practices in the Greater Toronto Area where physicians  
52  
53  
54  
55  
56  
57  
58  
59  
60

1  
2  
3  
4 were paid by capitation which may limit the generalizability of the findings to other settings  
5  
6  
7 including rural or low resource settings.  
8  
9  
10  
11  
12

## 13 CONCLUSIONS

14  
15  
16  
17 We found that sociodemographic characteristics impacted patients experience accessing and  
18  
19  
20 receiving primary care during the early months of the COVID-19 pandemic. While most  
21  
22  
23 patients were comfortable using virtual modalities, those having difficulty making ends meet,  
24  
25  
26 reporting poor or fair health, and being born outside of Canada being less likely to report comfort  
27  
28  
29 with virtual modalities and less likely to want virtual care options to continue post-pandemic.  
30  
31  
32  
33 Moving forward, clinicians and system decision makers need to carefully consider how we  
34  
35  
36  
37 integrate virtual care into practices to ensure equity in access to primary care.  
38  
39  
40  
41  
42  
43

44 **Contributors:** PA and TK conceived of and designed the study together. PA, CM, SW, AD, NG,  
45  
46  
47 GY, DE, TF, SF, MW, TP, NR, and TK designed the survey. RW and CM informed and  
48  
49  
50 conducted the analysis. PA, RW, CM, SW, AD, NG, GY, DE, TF, SF, MW, TP, NR, and TK  
51  
52  
53  
54  
55  
56  
57  
58  
59  
60

1  
2  
3  
4 helped interpret the data. PA drafted the manuscript with the support of TK and all authors  
5  
6  
7 critically reviewed it. All authors read and approved the final manuscript.  
8  
9

10 **Competing interests:** None declared.  
11  
12

13 **Funding:** This research received no specific grant from any funding agency in the public,  
14  
15  
16 commercial, or not-for-profit sectors. Dr. Kiran is the Fidani Chair of Improvement and  
17  
18 Innovation in Family Medicine at the University of Toronto and is supported as a Clinician  
19  
20 Scientist by the Department of Family and Community Medicine (DFCM) at the University of  
21  
22 Toronto and at St. Michael's Hospital. Funds from the Fidani Chair supported Dr. Agarwal as  
23  
24 the Patient Experience Measurement Lead for the DFCM.  
25  
26  
27  
28

29 **Data sharing statement:** Data are available upon reasonable request. Extra data is available by  
30  
31  
32 emailing Tara Kiran at [tara.kiran@utoronto.ca](mailto:tara.kiran@utoronto.ca).  
33  
34  
35

36 **Ethics approval statement:** The initiative was formally reviewed through the ReQUIST (Review  
37  
38 of Quality Improvement Studies) process at Unity Health Toronto, which is overseen by the  
39  
40 Vice-President, Care Experience and Equity and the Vice-President, Quality and Chief  
41  
42 Information Officer. The study was deemed to neither require Research Ethics Board approval  
43  
44  
45  
46 nor written informed consent from participants (i.e. the need for ethical approval was waived).  
47  
48  
49  
50  
51  
52  
53  
54  
55  
56  
57  
58  
59  
60

## REFERENCES

1. Lemire F, Slade S. Reflections on family practice and the pandemic first wave. *Can Fam Physician*. 2020;66(6):468.
2. Stamenova V, Agarwal P, Kelley L, et al. Uptake and patient and provider communication modality preferences of virtual visits in primary care: a retrospective cohort study in Canada. *BMJ Open* 2020;10:e037064. doi:10.1136/bmjopen-2020-037064
3. Perry AF, Federico F, Huebner J. Telemedicine: Ensuring Safe, Equitable, Person-Centered Virtual Care. IHI White Paper. Boston: Institute for Healthcare Improvement; 2021. (Available at [www.ihio.org](http://www.ihio.org))
4. Herzer KR, Pronovost PJ. Ensuring Quality in the Era of Virtual Care. *JAMA*. 2021;325(5):429–430. doi:10.1001/jama.2020.24955
5. Bhatia RS, Shojania KG, Levinson W. Cost of contact: redesigning healthcare in the age of COVID. *BMJ Quality & Safety* 2021;30:236-239.

- 1  
2  
3  
4 6. Glazier RH, Green ME, Wu FC, Frymire E, Kopp A, Kiran T. Shifts in office and virtual  
5  
6  
7 primary care during the early COVID-19 pandemic in Ontario, Canada. *CMAJ*.  
8  
9  
10 2021;193(6):E200-E210. doi:10.1503/cmaj.202303  
11  
12  
13  
14 7. Philip K, Cumella A, Farrington-Douglas J, Laffan M, Hopkinson N. Respiratory patient  
15  
16  
17 experience of measures to reduce risk of COVID-19: findings from a descriptive cross-  
18  
19  
20 sectional UK wide survey. *BMJ Open*. 2020;10(9):e040951. doi:[10.1136/bmjopen-2020-](https://doi.org/10.1136/bmjopen-2020-040951)  
21  
22  
23 [040951](https://doi.org/10.1136/bmjopen-2020-040951)  
24  
25  
26  
27 8. Krist AH, DeVoe JE, Cheng A, Ehrlich T, Jones SM. Redesigning Primary Care to  
28  
29  
30 Address the COVID-19 Pandemic in the Midst of the Pandemic. *Ann Fam Med*.  
31  
32  
33 2020;18(4):349-354. doi:[10.1370/afm.2557](https://doi.org/10.1370/afm.2557)  
34  
35  
36  
37 9. Bhatia RS, Jamieson T, Shaw J, Piovesan C, Kelley LT, Falk W. Canada's virtual care  
38  
39  
40 revolution: A framework for success. *Commentary - C.D.Howe Institute*.  
41  
42  
43 2020(586):0\_1,0\_2,1-20. [https://www.proquest.com/scholarly-journals/canadas-virtual-](https://www.proquest.com/scholarly-journals/canadas-virtual-care-revolution-framework-success/docview/2480820454/se-2?accountid=201395)  
44  
45  
46  
47 [care-revolution-framework-success/docview/2480820454/se-2?accountid=201395](https://www.proquest.com/scholarly-journals/canadas-virtual-care-revolution-framework-success/docview/2480820454/se-2?accountid=201395)  
48  
49  
50  
51  
52  
53  
54  
55  
56  
57  
58  
59  
60



- 1  
2  
3  
4 10. Zulman DM, Verghese A. Virtual Care, Telemedicine Visits, and Real Connection in the  
5  
6  
7 Era of COVID-19: Unforeseen Opportunity in the Face of Adversity. *JAMA*.  
8  
9  
10 2021;325(5):437-438. doi:[10.1001/jama.2020.27304](https://doi.org/10.1001/jama.2020.27304)  
11  
12  
13  
14 11. Herzer KR, Pronovost PJ. Ensuring Quality in the Era of Virtual Care. *JAMA*.  
15  
16  
17 2021;325(5):429-430. doi:[10.1001/jama.2020.24955](https://doi.org/10.1001/jama.2020.24955)  
18  
19  
20 12. Appireddy R, Jalini S, Shukla G, Boissé Lomax L. Tackling the Burden of Neurological  
21  
22  
23 Diseases in Canada with Virtual Care During the COVID-19 Pandemic and Beyond. *Can*  
24  
25  
26  
27 *J Neurol Sci*. 2020;47(5):594-597. doi:[10.1017/cjn.2020.92](https://doi.org/10.1017/cjn.2020.92)  
28  
29  
30 13. Rashid M. Virtual Inequity: Do virtual visits risk leaving some people behind? *Can Fam*  
31  
32  
33  
34 *Physician*. 2020. Available at: <https://www.cfp.ca/news/2020/09/25/09-25>  
35  
36  
37 14. Das LT, Gonzalez CJ. Preparing Telemedicine for the Frontlines of Healthcare Equity. *J*  
38  
39  
40 *GEN INTERN MED*. 2020;35(8):2443-2444. doi:[10.1007/s11606-020-05941-9](https://doi.org/10.1007/s11606-020-05941-9)  
41  
42  
43  
44 15. Fujioka JK, Budhwani S, Thomas-Jacques T, et al. Challenges and Strategies for  
45  
46  
47 Promoting Health Equity in Virtual Care: Protocol for a Scoping Review of Reviews.  
48  
49  
50  
51 *JMIR Res Protoc*. 2020;9(12):e22847. doi:[10.2196/22847](https://doi.org/10.2196/22847)  
52  
53  
54  
55  
56  
57  
58  
59  
60

- 1  
2  
3  
4 16. Peretz PJ, Islam N, Matiz LA. Community Health Workers and Covid-19 — Addressing  
5  
6  
7 Social Determinants of Health in Times of Crisis and Beyond. *N Engl J Med*.  
8  
9  
10 2020;383(19):e108. doi:[10.1056/NEJMp2022641](https://doi.org/10.1056/NEJMp2022641)  
11  
12  
13  
14 17. Chan S, O’Riordan A, Appireddy R. Exploring the Determinants and Experiences of  
15  
16  
17 Senior Stroke Patients with Virtual Care. *Can J Neurol Sci*. 2021;48(1):87-93.  
18  
19  
20 doi:[10.1017/cjn.2020.162](https://doi.org/10.1017/cjn.2020.162)  
21  
22  
23  
24 18. Scheerder A, van Deursen A, van Dijk J. Determinants of Internet skills, uses and  
25  
26  
27 outcomes. A systematic review of the second- and third-level digital divide. *Telematics*  
28  
29  
30 *and Informatics*. 2017;34(8):1607-1624. doi:[10.1016/j.tele.2017.07.007](https://doi.org/10.1016/j.tele.2017.07.007)  
31  
32  
33  
34 19. Velasquez D, Mehrotra A. Ensuring the Growth of Telehealth During COVID-19 Does  
35  
36  
37 Not Exacerbate Disparities in Care. *Health Affairs Blog*. 2020. doi:  
38  
39  
40 [10.1377/hblog20200505.591306](https://doi.org/10.1377/hblog20200505.591306)  
41  
42  
43  
44 20. Tang E, Li MK, Mauti ER, Masi R, Goldberg R. “Doctor Zoom will see you now”: An  
45  
46  
47 equity-focused perspective on virtual care in the era of COVID-19. *University of Toronto*  
48  
49  
50 *Medical Journal*. 2021;98(2):4. Available at:  
51  
52  
53  
54 <https://utmj.org/index.php/UTMJ/article/view/1424/1306>  
55  
56  
57  
58  
59  
60

- 1  
2  
3  
4 21. Khairat S, Pillai M, Edson B, Gianforcaro R. Evaluating the Telehealth Experience of  
5  
6  
7 Patients With COVID-19 Symptoms: Recommendations on Best Practices. *Journal of*  
8  
9  
10 *Patient Experience*. 2020;7(5):665-672. doi:[10.1177/2374373520952975](https://doi.org/10.1177/2374373520952975)  
11  
12  
13  
14 22. Sirotich E, Dillingham S, Grainger R, et al. Capturing Patient-Reported Outcomes During  
15  
16  
17 the COVID-19 Pandemic: Development of the COVID-19 Global Rheumatology  
18  
19  
20 Alliance Patient Experience Survey. *Arthritis Care Res*. 2020;72(7):871-873.  
21  
22  
23 doi:[10.1002/acr.24257](https://doi.org/10.1002/acr.24257)  
24  
25  
26  
27 23. Garrido-Cumbrera M, Marzo-Ortega H, Christen L, et al. Assessment of impact of the  
28  
29  
30 COVID-19 pandemic from the perspective of patients with rheumatic and  
31  
32  
33 musculoskeletal diseases in Europe: results from the REUMAVID study (phase 1). *RMD*  
34  
35  
36  
37 *Open*. 2021;7(1):e001546. doi:[10.1136/rmdopen-2020-001546](https://doi.org/10.1136/rmdopen-2020-001546)  
38  
39  
40  
41 24. Silvera GA, Wolf JA, Stanowski A, Studer Q. The influence of COVID-19 visitation  
42  
43  
44 restrictions on patient experience and safety outcomes: A critical role for subjective  
45  
46  
47 advocates. *Patient Experience Journal*. 2021;8(1):30-39. doi:[10.35680/2372-0247.1596](https://doi.org/10.35680/2372-0247.1596)  
48  
49  
50  
51  
52  
53  
54  
55  
56  
57  
58  
59  
60

1  
2  
3  
4 25. Bains J, Greenwald PW, Mulcare MR, et al. Utilizing Telemedicine in a Novel Approach  
5  
6  
7 to COVID-19 Management and Patient Experience in the Emergency Department.

8  
9  
10 *Telemedicine and e-Health*. 2021;27(3):254-260. doi:[10.1089/tmj.2020.0162](https://doi.org/10.1089/tmj.2020.0162)

11  
12  
13  
14 26. Ryan A. How multicultural is Toronto? Let us count the

15  
16  
17 ways...[https://torontoglobal.ca/TG-Blog/March-2019/How-multicultural-is-Toronto-Let-](https://torontoglobal.ca/TG-Blog/March-2019/How-multicultural-is-Toronto-Let-us-count-the-way)  
18  
19  
20 [us-count-the-way](https://torontoglobal.ca/TG-Blog/March-2019/How-multicultural-is-Toronto-Let-us-count-the-way). Published March 22, 2019.

21  
22  
23  
24 27. World Population Review. Toronto Population 2016.

25  
26  
27 <https://worldpopulationreview.com/canadian-cities/toronto-population>

28  
29  
30 28. City of Toronto. COVID-19: Case Counts. [https://www.toronto.ca/home/covid-19/covid-](https://www.toronto.ca/home/covid-19/covid-19-pandemic-data/covid-19-weekday-status-of-cases-data/)

31  
32  
33 [19-pandemic-data/covid-19-weekday-status-of-cases-data/](https://www.toronto.ca/home/covid-19/covid-19-pandemic-data/covid-19-weekday-status-of-cases-data/)

34  
35  
36  
37 29. CIHI. Commonwealth Fund survey, 2019. [https://www.cihi.ca/en/commonwealth-fund-](https://www.cihi.ca/en/commonwealth-fund-survey-2019)

38  
39  
40 [survey-2019](https://www.cihi.ca/en/commonwealth-fund-survey-2019)

41  
42  
43  
44 30. Commonwealth Fund. 2019 Commonwealth Fund International Health Policy Survey of

45  
46  
47 Primary Care Physicians.

48  
49  
50 [https://www.commonwealthfund.org/publications/surveys/2019/dec/2019-](https://www.commonwealthfund.org/publications/surveys/2019/dec/2019-commonwealth-fund-international-health-policy-survey-primary)

51  
52  
53 [commonwealth-fund-international-health-policy-survey-primary](https://www.commonwealthfund.org/publications/surveys/2019/dec/2019-commonwealth-fund-international-health-policy-survey-primary)

- 1  
2  
3  
4 31. Hutchison B, Haj-Ali W, Dobell G, Yeritsyan N, Degani N, Gushue S. Prioritizing and  
5  
6  
7 Implementing Primary Care Performance Measures for Ontario. *Healthc Policy*.  
8  
9  
10 2020;16(1):43-57. doi:[10.12927/hcpol.2020.26291](https://doi.org/10.12927/hcpol.2020.26291)  
11  
12  
13  
14 32. Health Quality Ontario. Primary Care Patient Experience Survey: Support Guide. 2015.  
15  
16  
17 <http://www.hqontario.ca/Portals/0/documents/qi/primary-care/primary-care-patient->  
18  
19  
20 [experience-survey-support-guide-en.pdf](http://www.hqontario.ca/Portals/0/documents/qi/primary-care/primary-care-patient-)  
21  
22  
23  
24 33. Park J, Erikson C, Han X, Iyer P. Are State Telehealth Policies Associated With The Use  
25  
26  
27 Of Telehealth Services Among Underserved Populations? *Health Affairs*.  
28  
29  
30 2018;37(12):2060-2068. doi:[10.1377/hlthaff.2018.05101](https://doi.org/10.1377/hlthaff.2018.05101)  
31  
32  
33  
34 34. Nouri S, Khoong E, Lyles C, Karliner L. Addressing Equity in Telemedicine for Chronic  
35  
36  
37 Disease Management During the Covid-19 Pandemic. *NEJM Catalyst Innovations in*  
38  
39  
40 *Care Delivery*. 2020. <https://catalyst.nejm.org/doi/full/10.1056/CAT.20.0123>  
41  
42  
43  
44 35. Mehrotra A, Ray K, Brockmeyer DM, Barnett ML, Bender JA. Rapidly Converting to  
45  
46  
47 “Virtual Practices”: Outpatient Care in the Era of Covid-19. *NEJM Catalyst Innovations*  
48  
49  
50 *in Care Delivery*. 2020. <https://catalyst.nejm.org/doi/full/10.1056/CAT.20.0091>  
51  
52  
53  
54  
55  
56  
57  
58  
59  
60

1  
2  
3  
4 36. Bhatia RS, Chu C, Pang A, Tadrus M, Stamenova V, Cram P. Virtual care use before  
5  
6  
7 and during the COVID-19 pandemic: a repeated cross-sectional study. *CMAJ Open*.

8  
9  
10 2021;9(1):E107-E114. doi:10.9778/cmajo.20200311  
11

12  
13 37. Weiss D, Rydland HT, Øversveen E, Jensen MR, Solhaug S, Krokstad S. Innovative  
14  
15  
16 technologies and social inequalities in health: A scoping review of the literature. Virgili  
17  
18  
19 G, ed. *PLoS ONE*. 2018;13(4):e0195447. doi:[10.1371/journal.pone.0195447](https://doi.org/10.1371/journal.pone.0195447)  
20  
21  
22  
23  
24  
25  
26  
27  
28  
29  
30  
31  
32  
33  
34  
35  
36  
37  
38  
39  
40  
41  
42  
43  
44  
45  
46  
47  
48  
49  
50  
51  
52  
53  
54  
55  
56  
57  
58  
59  
60

**Table 1.** Demographic characteristics of survey respondents (n=7482)

| Demographic characteristic               | Survey respondents<br>n (%) |
|------------------------------------------|-----------------------------|
| <b>Age (n=6744)</b>                      |                             |
| 0 to 5 years old                         | 169 (2.51%)                 |
| 6 to 17 years old                        | 166 (2.46%)                 |
| 18 to 24 years old                       | 120 (1.78%)                 |
| 25 to 34 years old                       | 520 (7.71%)                 |
| 35 to 49 years old                       | 1412 (20.94%)               |
| 50 to 64 years old                       | 2002 (29.69%)               |
| 65 to 79 years old                       | 1921 (28.48%)               |
| 80 years or older                        | 434 (6.44%)                 |
| <b>Gender (n=6713)</b>                   |                             |
| Woman                                    | 4379 (65.23%)               |
| Man                                      | 2221 (33.09%)               |
| Other                                    | 60 (0.89%)                  |
| Prefer not to answer                     | 53 (0.79%)                  |
| <b>Education level (n=6588)</b>          |                             |
| Highschool or less                       | 1429 (21.69%)               |
| College/University                       | 3198 (48.54%)               |
| Graduate/Professional                    | 1961 (29.77%)               |
| <b>Trouble making ends meet (n=6556)</b> |                             |
| Yes                                      | 590 (9.00%)                 |

|                                         |                                 |               |
|-----------------------------------------|---------------------------------|---------------|
|                                         | No                              | 5201 (79.33%) |
|                                         | Don't know/Prefer not to answer | 765 (11.67%)  |
| <b>Born in Canada (n=6656)</b>          |                                 |               |
|                                         | Yes                             | 4728 (71.03%) |
|                                         | No                              | 1928 (28.97%) |
| <b>Arrive in last 10 years (n=1856)</b> |                                 |               |
|                                         | Yes                             | 326 (17.56%)  |
|                                         | No                              | 1530 (82.44%) |
| <b>Preferred language (n=6678)</b>      |                                 |               |
|                                         | English                         | 6576 (98.47%) |
|                                         | Non-English                     | 102 (1.53%)   |
| <b>Self rated health (n=6665)</b>       |                                 |               |
|                                         | Excellent                       | 1002 (15.03%) |
|                                         | Very good                       | 2599 (38.99%) |
|                                         | Good                            | 2086 (31.30%) |
|                                         | Fair/Poor                       | 978 (14.67%)  |
| <b>Usual PCP (n=6545)</b>               |                                 |               |
|                                         | Staff physician                 | 4842 (73.98%) |
|                                         | Resident physician              | 1217 (18.59%) |
|                                         | Nurse practitioner              | 173 (2.64%)   |
|                                         | Unsure                          | 313 (4.78%)   |

\*Created by the authors.



**Table 2.** Proportion of respondents who received care at their primary care practice who reported that they delayed seeking care because of the pandemic, by sociodemographic characteristic

| <b>Demographics</b>             | <b>Delayed Care<br/>n (%)</b> | <b>P-value</b> |
|---------------------------------|-------------------------------|----------------|
| <b>All</b>                      | 1509 (30.53%)                 |                |
| <b>Age</b>                      |                               |                |
| <18 years old                   | 61 (29.90%)                   | <0.01          |
| 18-34 years old                 | 158 (35.03%)                  |                |
| 35-64 years old                 | 704 (31.44%)                  |                |
| 65+ years old                   | 429 (26.85%)                  |                |
| <b>Gender</b>                   |                               |                |
| Woman                           | 932 (31.65%)                  | <0.001         |
| Man                             | 376 (26.07%)                  |                |
| Other                           | 20 (42.55%)                   |                |
| Prefer not to answer            | 18 (46.15%)                   |                |
| <b>Education</b>                |                               |                |
| Highschool or less              | 238 (24.74%)                  | <0.001         |
| College/University              | 637 (30.09%)                  |                |
| Graduate/Professional           | 443 (33.95%)                  |                |
| <b>Trouble making ends meet</b> |                               |                |
| Yes                             | 188 (42.63%)                  | <0.001         |
| No                              | 928 (27.33%)                  |                |
| Don't know/Prefer not to answer | 196 (37.69%)                  |                |

|                            |                    |               |        |
|----------------------------|--------------------|---------------|--------|
| <b>Born in Canada</b>      |                    |               |        |
|                            | Yes                | 966 (30.92%)  | 0.07   |
|                            | No                 | 366 (28.09%)  |        |
| <b>Arrive &lt;10 years</b> |                    |               |        |
|                            | Yes                | 66 (29.33%)   | 0.79   |
|                            | No                 | 289 (28.20%)  |        |
| <b>Preferred Language</b>  |                    |               |        |
|                            | English            | 1322 (30.20%) | 0.49   |
|                            | Non-English        | 24 (34.78%)   |        |
| <b>Self rated health</b>   |                    |               |        |
|                            | Excellent          | 153 (25.54%)  | <0.001 |
|                            | Very good          | 475 (28.84%)  |        |
|                            | Good               | 433 (30.20%)  |        |
|                            | Fair/Poor          | 275 (36.57%)  |        |
| <b>Usual PCP</b>           |                    |               |        |
|                            | Staff physician    | 976 (30.13%)  | 0.47   |
|                            | Resident physician | 246 (29.85%)  |        |
|                            | Nurse practitioner | 45 (36.59%)   |        |
|                            | Unsure             | 52 (29.21%)   |        |

\*Created by the authors.

**Table 3.** Percentage of patients who reported receiving care by phone and in person during the pandemic, by sociodemographic characteristic

| <b>Demographics</b>             | <b>In person care<br/>n (%)</b> | <b>P-value</b> | <b>Phone care<br/>n (%)</b> | <b>P-value</b> |
|---------------------------------|---------------------------------|----------------|-----------------------------|----------------|
| <b>All</b>                      | 1553 (30.64%)                   |                | 4195(82.77%)                |                |
| <b>Age</b>                      |                                 |                |                             |                |
| <18 years old                   | 102 (50.00%)                    | <0.001         | 143 (70.10%)                | <0.001         |
| 18-34 years old                 | 181 (40.13%)                    |                | 404 (89.58%)                |                |
| 35-64 years old                 | 603 (26.93%)                    |                | 1922 (85.84%)               |                |
| 65+ years old                   | 476 (29.79%)                    |                | 1338 (83.73%)               |                |
| <b>Gender</b>                   |                                 |                |                             |                |
| Woman                           | 882 (29.95%)                    | 0.57           | 2559 (86.89%)               | <0.001         |
| Man                             | 443 (30.72%)                    |                | 1163 (80.65%)               |                |
| Other                           | 17 (36.17%)                     |                | 41 (87.23%)                 |                |
| Prefer not to answer            | 9 (23.08%)                      |                | 33 (84.62%)                 |                |
| <b>Education Level</b>          |                                 |                |                             |                |
| Highschool or less              | 303 (31.50%)                    | 0.42           | 787 (81.81%)                | <0.05          |
| College/University              | 618 (29.19%)                    |                | 1818 (85.88%)               |                |
| Graduate/Professional           | 396 (30.34%)                    |                | 1109 (84.98%)               |                |
| <b>Trouble making ends meet</b> |                                 |                |                             |                |
| Yes                             | 122 (27.66%)                    | 0.28           | 396 (89.80%)                | <0.001         |
| No                              | 1047 (30.83%)                   |                | 2840 (83.63%)               |                |
| <b>Born in Canada</b>           |                                 |                |                             |                |

|                             |                    |               |        |               |        |
|-----------------------------|--------------------|---------------|--------|---------------|--------|
|                             | Yes                | 977 (31.27%)  | <0.05  | 2630 (84.19%) | 0.13   |
|                             | No                 | 363 (27.86%)  |        | 1121 (86.03%) |        |
| <b>Arrive &lt;10 years</b>  |                    |               |        |               |        |
|                             | Yes                | 77 (34.22%)   | <0.05  | 196 (87.11%)  | 0.73   |
|                             | No                 | 276 (26.93%)  |        | 881 (85.95%)  |        |
| <b>Preferred language</b>   |                    |               |        |               |        |
|                             | English            | 1326 (30.29%) | 0.88   | 3706 (84.67%) | 1.00   |
|                             | Non-English        | 22 (31.88%)   |        | 58 (84.06%)   |        |
| <b>Self Reported Health</b> |                    |               |        |               |        |
|                             | Excellent          | 221 (36.89%)  | <0.001 | 470 (78.46%)  | <0.001 |
|                             | Very good          | 522 (31.69%)  |        | 1390 (84.40%) |        |
|                             | Good               | 383 (26.71%)  |        | 1222 (85.22%) |        |
|                             | Fair/Poor          | 220 (29.26%)  |        | 673 (89.49%)  |        |
| <b>Usual PCP</b>            |                    |               |        |               |        |
|                             | Staff physician    | 963 (29.73%)  | 0.10   | 2750 (84.90%) | 0.22   |
|                             | Resident physician | 270 (32.77%)  |        | 701 (85.07%)  |        |
|                             | Nurse practitioner | 46 (37.40%)   |        | 97 (78.86%)   |        |
|                             | Unsure             | 50 (28.09%)   |        | 146 (82.02%)  |        |

\*Created by the authors.

**Table 4.** Percentage of patients who reported they were comfortable with the privacy and security of using phone, video and email or secure messaging to receive care during the pandemic, by sociodemographic characteristic

| Demographics                    | Phone<br>n (%) | P-value | Video<br>n (%) | P-value | Email<br>Messaging<br>n (%) | P-value |
|---------------------------------|----------------|---------|----------------|---------|-----------------------------|---------|
| <b>All</b>                      | 3824 (92.39%)  |         | 238 (95.20%)   |         | 794 (91.26%)                |         |
| <b>Age</b>                      |                |         |                |         |                             |         |
| <18 years old                   | 138 (96.50%)   | <0.05   | 19 (95.00%)    | 0.60    | 17 (94.44%)                 | 0.43    |
| 18-34 years old                 | 371 (91.83%)   |         | 28 (93.33%)    |         | 90 (87.38%)                 |         |
| 35-64 years old                 | 1800 (93.65%)  |         | 104 (94.55%)   |         | 383 (90.54%)                |         |
| 65+ years old                   | 1223 (91.41%)  |         | 63 (98.44%)    |         | 249 (92.57%)                |         |
| <b>Gender</b>                   |                |         |                |         |                             |         |
| Woman                           | 2385 (93.20%)  | <0.001  | 128 (96.97%)   | 0.17    | 501 (90.60%)                | <0.001  |
| Man                             | 1077 (92.61%)  |         | 75 (94.94%)    |         | 219 (92.80%)                |         |
| Other                           | 40 (97.56%)    |         | 4 (80.00%)     |         | 15 (100.00%)                |         |
| Prefer not to answer            | 24 (72.73%)    |         | 6 (85.71%)     |         | 2 (40.00%)                  |         |
| <b>Education Level</b>          |                |         |                |         |                             |         |
| Highschool or less              | 743 (94.41%)   | 0.17    | 47 (92.16%)    | 0.20    | 121 (93.08%)                | 0.65    |
| College/University              | 1679 (92.35%)  |         | 94 (97.92%)    |         | 358 (90.63%)                |         |
| Graduate/Professional           | 1032 (93.06%)  |         | 66 (92.96%)    |         | 250 (91.91%)                |         |
| <b>Trouble making ends meet</b> |                |         |                |         |                             |         |
| Yes                             | 354 (89.39%)   | <0.001  | 24 (92.31%)    | 0.63    | 70 (85.37%)                 | <0.001  |

|                                    |               |        |              |      |              |       |
|------------------------------------|---------------|--------|--------------|------|--------------|-------|
| No                                 | 2679 (94.33%) |        | 153 (96.23%) |      | 576 (93.96%) |       |
| I don't know/Prefer not to answer  | 400 (87.53%)  |        | 30 (96.77%)  |      | 75 (78.12%)  |       |
| <b>Born in Canada</b>              |               |        |              |      |              |       |
| Yes                                | 2471 (93.95%) | <0.001 | 159 (95.78%) | 1.00 | 526 (92.93%) | <0.05 |
| No                                 | 1019 (90.90%) |        | 54 (94.74%)  |      | 204 (87.18%) |       |
| <b>Arrive in the last 10 years</b> |               |        |              |      |              |       |
| Yes                                | 176 (89.80%)  | 0.80   | 7 (100.00%)  | 1.00 | 34 (82.93%)  | 0.52  |
| No                                 | 799 (90.69%)  |        | 45 (93.75%)  |      | 163 (88.11%) |       |
| <b>Preferred language</b>          |               |        |              |      |              |       |
| English                            | 3440 (92.82%) | 0.50   | 209 (95.43%) | 0.48 | 727 (91.33%) | 0.40  |
| Non-English                        | 52 (89.66%)   |        | 3 (75.00%)   |      | 7 (77.78%)   |       |
| <b>Self Reported Health</b>        |               |        |              |      |              |       |
| Excellent                          | 455 (96.81%)  | <0.001 | 30 (93.75%)  | 0.98 | 105 (95.45%) | <0.05 |
| Very good                          | 1324 (95.25%) |        | 65 (95.59%)  |      | 259 (93.50%) |       |
| Good                               | 1131 (92.55%) |        | 72 (94.74%)  |      | 235 (90.04%) |       |
| Fair/Poor                          | 579 (86.03%)  |        | 42 (95.45%)  |      | 133 (85.81%) |       |
| <b>Usual PCP</b>                   |               |        |              |      |              |       |
| Staff physician                    | 2575 (93.64%) | <0.05  | 164 (96.47%) | 0.17 | 568 (92.21%) | 0.07  |
| Resident physician                 | 640 (91.30%)  |        | 28 (87.50%)  |      | 107 (87.70%) |       |
| Nurse practitioner                 | 86 (88.66%)   |        | 4 (100.00%)  |      | 17 (89.47%)  |       |
| Unsure                             | 130 (89.04%)  |        | 11 (91.67%)  |      | 24 (80.00%)  |       |

\*Created by the authors.

1  
2  
3  
4  
5  
6  
7  
8  
9  
10  
11  
12  
13  
14  
15  
16  
17  
18  
19  
20  
21  
22  
23  
24  
25  
26  
27  
28  
29  
30  
31  
32  
33  
34  
35  
36  
37  
38  
39  
40  
41  
42  
43  
44  
45  
46  
47

For peer review only

**Table 5.** Preferences for ongoing uses of virtual care options after the pandemic, by sociodemographic characteristic

| Demographics                      | Phone<br>n (%) | P-value | Video<br>n (%) | P-value | Email<br>Messaging<br>n (%) | P-value |
|-----------------------------------|----------------|---------|----------------|---------|-----------------------------|---------|
| <b>All</b>                        | 3798 (74.94%)  |         | 2172 (42.86%)  |         | 2644 (52.17%)               |         |
| <b>Age</b>                        |                |         |                |         |                             |         |
| <18 years old                     | 171 (83.82%)   | <0.05   | 120 (58.82%)   | <0.001  | 117 (57.35%)                | <0.001  |
| 18-34 years old                   | 385 (85.37%)   |         | 252 (55.88%)   |         | 292 (64.75%)                |         |
| 35-64 years old                   | 1886 (84.23%)  |         | 1206 (53.86%)  |         | 1352 (60.38%)               |         |
| 65+ years old                     | 1291 (80.79%)  |         | 549 (34.36%)   |         | 834 (52.19%)                |         |
| <b>Gender</b>                     |                |         |                |         |                             |         |
| Woman                             | 2510 (85.23%)  | <0.001  | 1418 (48.15%)  | 0.45    | 1758 (59.69%)               | <0.01   |
| Man                               | 1142 (79.20%)  |         | 662 (45.91%)   |         | 780 (54.09%)                |         |
| Other                             | 37 (78.72%)    |         | 23 (48.94%)    |         | 31 (65.96%)                 |         |
| Prefer not to answer              | 29 (74.36%)    |         | 21 (53.85%)    |         | 20 (51.28%)                 |         |
| <b>Education Level</b>            |                |         |                |         |                             |         |
| Highschool or less                | 770 (80.04%)   | <0.05   | 384 (39.92%)   | <0.001  | 468 (48.65%)                | <0.001  |
| College/University                | 1777 (83.94%)  |         | 993 (46.91%)   |         | 1227 (57.96%)               |         |
| Graduate/Professional             | 1098 (84.14%)  |         | 705 (54.02%)   |         | 846 (64.83%)                |         |
| <b>Trouble making ends meet</b>   |                |         |                |         |                             |         |
| Yes                               | 362 (82.09%)   | <0.001  | 195 (44.22%)   | <0.001  | 257 (58.28%)                | <0.001  |
| No                                | 2869 (84.48%)  |         | 1665 (49.03%)  |         | 2037 (59.98%)               |         |
| I don't know/Prefer not to answer | 387 (74.42%)   |         | 204 (39.23%)   |         | 232 (44.62%)                |         |



|                                    |               |        |               |        |               |        |  |
|------------------------------------|---------------|--------|---------------|--------|---------------|--------|--|
| <b>Born in Canada</b>              |               |        |               |        |               |        |  |
| Yes                                | 2687 (86.01%) | <0.001 | 1579 (50.54%) | <0.001 | 1890 (60.50%) | <0.001 |  |
| No                                 | 1005 (77.13%) |        | 527 (40.45%)  |        | 683 (52.42%)  |        |  |
| <b>Arrive in the last 10 years</b> |               |        |               |        |               |        |  |
| Yes                                | 166 (73.78%)  | 0.13   | 89 (39.56%)   | 0.90   | 101 (44.89%)  | <0.05  |  |
| No                                 | 806 (78.63%)  |        | 413 (40.29%)  |        | 554 (54.05%)  |        |  |
| <b>Preferred language</b>          |               |        |               |        |               |        |  |
| English                            | 3642 (83.21%) | 0.12   | 2086 (47.66%) | 0.08   | 2532 (57.85%) | <0.05  |  |
| Non-English                        | 52 (75.36%)   |        | 25 (36.23%)   |        | 29 (42.03%)   |        |  |
| <b>Self Reported Health</b>        |               |        |               |        |               |        |  |
| Excellent                          | 519 (86.64%)  | <0.01  | 330 (55.09%)  | <0.001 | 382 (63.77%)  | <0.001 |  |
| Very good                          | 1392 (84.52%) |        | 843 (51.18%)  |        | 977 (59.32%)  |        |  |
| Good                               | 1179 (82.22%) |        | 635 (44.28%)  |        | 809 (56.42%)  |        |  |
| Fair/Poor                          | 597 (79.39%)  |        | 294 (39.10%)  |        | 394 (52.39%)  |        |  |
| <b>Usual PCP</b>                   |               |        |               |        |               |        |  |
| Staff physician                    | 2730 (84.29%) | <0.001 | 1613 (49.80%) | <0.001 | 1943 (59.99%) | <0.001 |  |
| Resident physician                 | 659 (79.98%)  |        | 336 (40.78%)  |        | 415 (50.36%)  |        |  |
| Nurse practitioner                 | 104 (84.55%)  |        | 55 (44.72%)   |        | 73 (59.35%)   |        |  |
| Unsure                             | 133 (74.72%)  |        | 79 (44.38%)   |        | 92 (51.69%)   |        |  |

\*Created by the authors.

# Improving your Patient Experience

Dept of Family and Community Medicine, University of Toronto  
Draft Jun 1, 2020

---

## Start of Block: Intro Block

Q1 Dear THE CLINIC'S NAME Patient,

The CLINIC wants to know about your experience getting health care during the COVID-19 pandemic. We are asking you to complete a short survey, which will take about 5 minutes. Your answers will help us to improve the care we provide.

You are receiving this survey because either you or your family member is a patient with CLINIC and have a birthday in MONTH1, MONTH2, MONTH3. Participation is voluntary and responses are confidential. We do not ask for your name in the survey and your answers cannot be linked back to your chart. We are interested in your honest opinion, whether it is negative or positive. Your responses to this survey will not change the care you receive from us.

PLEASE NOTE: This survey is for the person in your family who has a birthday in MONTH1, MONTH2, MONTH3. If this person is someone you are a caregiver for (a child or parent), please respond based on their care experience. If your own birthday is also in MONTH 1, MONTH 2, MONTH 3, you can choose to respond based on your own care experience.

## End of Block: Intro Block

---

## Start of Block: Block 1

Q2 Section 1 – Care needs during pandemic

*The following questions will help us better understand your comfort with accessing care during the COVID-19 pandemic. Please think about the care you received after March 17, 2020 (the date Ontario declared a state of emergency due to COVID-19).*



1  
2  
3 **Q3 Did you receive care from a doctor, nurse or healthcare provider at CLINIC during the**  
4 **COVID-19 pandemic? This includes care delivered in person, by phone, by video or by**  
5 **email or secure message.**  
6

7  
8  Yes (1)  
9

10  No (2)  
11  
12

13 *Skip To: Q12 If DFCM1.1 = No*  
14



17  
18  
19 **Q4 How did you receive care during this time? (Select all that apply)**  
20

21  In person (1)  
22

23  Phone call (2)  
24

25  Video (3)  
26

27  Email or secure message (4)  
28  
29  
30  
31  
32  
33

34  
35 *Display This Question:*

36 *If DFCM1.2 = Phone call*  
37



1  
2  
3 Q5 When using the PHONE to discuss your health concerns, how comfortable were you with  
4 the level of privacy and security? (Select one response)  
5  
6

- 7  Extremely comfortable (1)  
8  
9  Somewhat comfortable (2)  
10  
11  Neither comfortable nor uncomfortable (3)  
12  
13  Somewhat uncomfortable (4)  
14  
15  Extremely uncomfortable (5)  
16  
17  
18  
19

20  
21 *Display This Question:*

22 *If DFCM1.2 = Phone call*  
23



25  
26 Q6 When using the PHONE , was there anything you did not talk about because you were  
27 worried about privacy? (Select one response with optional comments)  
28  
29

- 30  Yes (1)  
31  
32  No (2)  
33  
34  Comments: (3) \_\_\_\_\_  
35  
36  
37  
38  
39

40  
41 *Display This Question:*

42 *If DFCM1.2 = Video*  
43



1  
2  
3 Q7 When using VIDEO to discuss your health concerns, how comfortable were you with the  
4 level of privacy and security? (Select one response)  
5  
6

- 7  Extremely comfortable (1)  
8  
9  Somewhat comfortable (2)  
10  
11  Neither comfortable nor uncomfortable (3)  
12  
13  Somewhat uncomfortable (4)  
14  
15  Extremely uncomfortable (5)  
16  
17  
18  
19

20  
21 *Display This Question:*

22 *If DFCM1.2 = Video*  
23

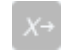

25  
26 Q8 When using VIDEO, was there anything you did not talk about because you were  
27 worried about privacy? (Select one response with optional comments)  
28  
29

- 30  Yes (1)  
31  
32  No (2)  
33  
34  Comments: (3) \_\_\_\_\_  
35  
36  
37  
38  
39

40  
41 *Display This Question:*

42 *If DFCM1.2 = Email or secure message*  
43

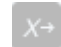

1  
2  
3 Q9 When using EMAIL or SECURE MESSAGE to discuss your health concerns, how  
4 comfortable were you with the level of privacy and security? (Select one response)  
5  
6

- 7  Extremely comfortable (1)  
8  
9  Somewhat comfortable (2)  
10  
11  Neither comfortable nor uncomfortable (3)  
12  
13  Somewhat uncomfortable (4)  
14  
15  Extremely uncomfortable (5)  
16  
17  
18  
19

20  
21 *Display This Question:*

22 *If DFCM1.2 = Email or secure message*  
23



25  
26 Q10 When using EMAIL or SECURE MESSAGE, was there anything you did not talk about  
27 because you were worried about privacy? (Select one response with optional comments)  
28  
29

- 30  Yes (1)  
31  
32  No (2)  
33  
34  Comments: (3) \_\_\_\_\_  
35  
36  
37  
38  
39



42  
43  
44 Q11 Did you avoid or delay receiving care from THE CLINIC because of the COVID-19  
45 pandemic? (Select one response)  
46

- 47  Yes (1)  
48  
49  No (2)  
50  
51  
52  
53

1  
2  
3  
4  
5  
6  
7  
8  
9  
10  
11  
12  
13  
14  
15  
16  
17  
18  
19  
20  
21  
22  
23  
24  
25  
26  
27  
28  
29  
30  
31  
32  
33  
34  
35  
36  
37  
38  
39  
40  
41  
42  
43  
44  
45  
46  
47  
48  
49  
50  
51  
52  
53  
54  
55  
56  
57  
58  
59  
60

Display This Question:

If DFCM1.1 = No



**Q12 Please tell us why you did not get care from THE CLINIC during the COVID pandemic:** (Select all that apply)

- I did not have any health needs (1)
- I did not know I could receive care from the clinic during the pandemic (2)
- I did not want to come into the clinic because I was worried for my personal safety (3)
- I tried but could not get an appointment (4)
- The hours were inconvenient (5)
- I could not get through to the clinic on the phone (7)
- Other (please specify): (6)
- 

Display This Question:

If DFCM1.1 = No



1  
2  
3 **Q13 Did you get care somewhere else during the COVID pandemic?** (Select all that apply)  
4  
5

6   No, I did not get care elsewhere (1)  
7

8  
9  I got care from a walk-in clinic in person (2)  
10

11  
12  I got care from a walk-in clinic by phone or video (3)  
13

14  
15  I went to the emergency department (4)  
16

17  
18  Other (please specify): (5)  
19  
20  
21  
22

23 End of Block: Block 1  
24

25 Start of Block: Block 2  
26  
27

28 **Q14 Section 2: Getting URGENT CARE when you are sick during the COVID-19 pandemic**

29 *The following questions help us better understand the experience of patients who were sick*  
30 *and wanted to be seen urgently. Please answer the questions below for the time during the*  
31 *COVID-19 pandemic only (starting March 17, 2020).*  
32  
33

34 -----



37  
38  
39 **Q15 During the COVID-19 pandemic, was there a time when you were sick and**  
40 **URGENTLY needed care at THE CLINC?** (Select one response)  
41

42  Yes (1)  
43

44  No (2)  
45  
46  
47

48 Skip To: End of Block If DFCM2.1 = No  
49 -----

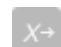

52  
53 **Q16 Think about the time you needed URGENT CARE. How many days did it take from**  
54 **when you first tried to book an appointment at our clinic to when you received care?**  
55  
56  
57  
58  
59  
60



Care could include an in-person visit, phone visit, video visit and/or email or secure messaging. (Select one response).

- On the same day (1)
- The next day (2)
- In 2 to 3 days (3)
- In 4 to 7 days (4)
- After more than 1 week (5)
- Never able to get an appointment (6)
- Not sure (7)

Display This Question:

If DFCM2.2 = In 2 to 3 days

Or DFCM2.2 = In 4 to 7 days

And DFCM2.2 = After more than 1 week

And DFCM2.2 = Never able to get an appointment



Q17 Why were you not able to get care the same or next day? (Select all that apply)

- I was informed that there was no availability (1)
- I was offered an appointment but not with the provider I preferred (2)
- I was offered an appointment but not at the time I preferred (3)
- I could not get through to the clinic on the phone (4)
- Other (Please specify) (5)
-



Q18 How would you describe the length of time it took between making the appointment and receiving care? (Select one response)

- About right (1)
  - Somewhat too long (2)
  - Much too long (3)
- 



Q19 During the COVID-19 pandemic, did you need urgent care on an evening, weekend, or public holiday?

- Yes (1)
  - No (2)
- 

*Display This Question:*

*If DFCM2.5 = Yes*



Q20 How easy or difficult was it to get urgent care from CLINIC on an evening, weekend, or holiday during the COVID-19 pandemic?

- Very easy (1)
- Somewhat easy (2)
- Neither easy nor difficult (3)
- Somewhat difficult (4)
- Very difficult (5)

**End of Block: Block 2**

---

**Start of Block: Block 3**

1  
2  
3  
4  
5  
6  
7  
8  
9  
10  
11  
12  
13  
14

**Q21 Section 3: Care experience**

*For the next set of questions, please think about your experience when receiving care from your doctor or nurse practitioner during the COVID-19 pandemic only (starting March 17, 2020). This includes care delivered in person, by phone, by video or by email or secure message.*

-----



15  
16  
17  
18  
19  
20  
21  
22  
23  
24  
25  
26  
27  
28  
29  
30  
31  
32  
33  
34

**Q22 How often did you receive care from the doctor or nurse practitioner that you prefer?**  
(select one response)

- I do not have a preferred health care provider (1)
  - Always (2)
  - Usually (3)
  - Occasionally (4)
  - Rarely (5)
  - Never (6)
- 



35  
36  
37  
38  
39  
40  
41  
42  
43  
44  
45  
46  
47  
48  
49  
50  
51  
52  
53  
54

**Q23 How often did you receive care within a reasonable time from your doctor or nurse practitioner?** (Select one response)

- Always (1)
  - Usually (2)
  - Occasionally (3)
  - Rarely (4)
  - Never (5)
- 

55  
56  
57  
58  
59  
60

Page Break

---

1  
2  
3  
4  
5  
6  
7  
8  
9  
10  
11  
12  
13  
14  
15  
16  
17  
18  
19  
20  
21  
22  
23  
24  
25  
26  
27  
28  
29  
30  
31  
32  
33  
34  
35  
36  
37  
38  
39  
40  
41  
42  
43  
44  
45  
46  
47  
48  
49  
50  
51  
52  
53  
54  
55  
56  
57  
58  
59  
60

For peer review only



1  
2  
3  
4  
5  
6 **Q24 When you received care from your doctor or nurse practitioner, how often did they**  
7 **involve you as much as you want to be in decisions about your care and**  
8 **treatment?** (Select one response)  
9

- 10  Always (1)  
11  
12  Usually (2)  
13  
14  Occasionally (3)  
15  
16  Rarely (4)  
17  
18  Never (5)  
19  
20  
21  
22

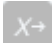

23  
24  
25  
26  
27 **Q25 When you received care from your doctor or nurse practitioner, how often did they**  
28 **spend enough time with you?** (Select one response)  
29

- 30  
31  Always (1)  
32  
33  Usually (2)  
34  
35  Occasionally (3)  
36  
37  Rarely (4)  
38  
39  Never (5)  
40  
41  
42  
43

44 **End of Block: Block 3**

45  
46 **Start of Block: Block ADDITIONAL**

47  
48  
49 **Q26 Click to write the question text**

50  
51  
52 **End of Block: Block ADDITIONAL**

53  
54 **Start of Block: Block 4**  
55  
56  
57  
58  
59  
60

1  
2  
3 **Q27 Section 4: Your recommendations** *For the next set of questions, please share your*  
4 *thoughts on how we can improve THE CLINIC.*  
5  
6  
7 -----



9  
10  
11 **Q28 After the COVID-19 pandemic is over, which of these care options should the clinic**  
12 **continue to offer?** (Select all that apply)  
13

- 14  Phone (1)  
15  
16  Video (2)  
17  
18  Email/secure messaging portal (3)  
19  
20  Other (4) \_\_\_\_\_  
21  
22  None of the above (5)  
23  
24  
25  
26  
27  
28  
29  
30

31 -----  
32  
33 **Q29 What changes did our clinic make during COVID-19 that you would like us to**  
34 **continue?** (Optional)  
35

36 \_\_\_\_\_  
37  
38 \_\_\_\_\_  
39  
40 \_\_\_\_\_  
41  
42 \_\_\_\_\_  
43  
44 \_\_\_\_\_  
45  
46 \_\_\_\_\_  
47

48 -----  
49  
50 **Q30 What do you think our clinic could have done differently to better meet your health**  
51 **needs during the COVID-19 pandemic?** (Optional)  
52

53 \_\_\_\_\_  
54  
55 \_\_\_\_\_  
56  
57  
58  
59  
60

1  
2  
3  
4  
5  
6  
7  
8  
9  
10  
11  
12  
13  
14  
15  
16  
17  
18  
19  
20  
21  
22  
23  
24  
25  
26  
27  
28  
29  
30  
31  
32  
33  
34  
35  
36  
37  
38  
39  
40  
41  
42  
43  
44  
45  
46  
47  
48  
49  
50  
51  
52  
53  
54  
55  
56  
57  
58  
59  
60

---

---

---

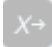

**Q31 Overall, would you recommend our clinic, to your friends and family? (Select one response)**

- Yes (1)
- No (2)

End of Block: Block 4

---

Start of Block: Block 5a

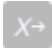

**Q32 Are you filling this survey out on behalf of someone else? (Select one response)**

- Yes (1)
- No (2)

End of Block: Block 5a

---

Start of Block: Block 5b - Family

**Q33 Section 5: About Your Family Member**

This final section of the survey helps us understand if some groups are experiencing care differently than others.



For peer review only

1  
2  
3 Q34 I am filling this survey on behalf of my child or family member who is: (optional)  
4  
5

- 6  0-5 years old (1)  
7  
8  6-17 years old (2)  
9  
10  18-24 years old (3)  
11  
12  25-34 years old (4)  
13  
14  35-49 years old (5)  
15  
16  50-64 years old (6)  
17  
18  65-79 years old (7)  
19  
20  80+ years old (8)  
21  
22  
23  
24



28  
29  
30 Q35 What gender do they identify with? (optional)  
31

- 32  Woman/girl (1)  
33  
34  Man/boy (2)  
35  
36  Transgender woman/girl (3)  
37  
38  Transgender man/boy (4)  
39  
40  Non-binary (for example gender queer, 2-spirit) (5)  
41  
42  Identity not listed (please specify) (6)  
43  
44  
45  
46  
47  
48  Prefer not to answer (7)  
49  
50





1  
2  
3 Q36 What is their highest level of education? (optional)  
4  
5

- 6  Elementary school or less (1)  
7  
8  Some High school (2)  
9  
10  High School Diploma (3)  
11  
12  College or University Diploma Degree (4)  
13  
14  Graduate or Professional Degree (5)  
15  
16  
17



21  
22 Q37 Do they have trouble making ends meet (money problems) at the end of the month?  
23 (optional)  
24

- 25  Yes (1)  
26  
27  No (2)  
28  
29  I don't know (3)  
30  
31  Prefer not to answer (4)  
32  
33  
34  
35



39  
40 Q38 Were they born in Canada? (optional)  
41

- 42  Yes (1)  
43  
44  No (2)  
45  
46  
47  
48

49 **Display This Question:**

50 *If DFCM5b.5 = No*  
51



1  
2  
3 **Q39 Did you arrive in Canada in the last 10 years?** (optional)  
4

5  Yes (1)  
6  
7

8  No (2)  
9  
10



13  
14  
15 **Q40 What language would they prefer speaking with their primary care**  
16 **provider?** (optional)  
17

18  English (1)  
19

20  French (2)  
21

22  Other (please specify): (3) \_\_\_\_\_  
23  
24  
25



28  
29  
30 **Q41 In general, would you say their health is:** (optional)  
31

32  Excellent (1)  
33

34  Very Good (2)  
35

36  Good (3)  
37

38  Fair (4)  
39

40  Poor (5)  
41  
42  
43  
44



47  
48  
49 **Q42 What is their postal code?** (optional)  
50  
51  
52  
53  
54  
55  
56  
57  
58  
59  
60

\_\_\_\_\_



Q43 Which primary care provider do they usually see? (optional)

- Staff Physician (1)
- Resident Physician (2)
- Nurse Practitioner (3)
- Unsure (4)

End of Block: Block 5b - Family

---

Start of Block: Block 5c - Yourself

#### Q44 Section 5: About You

This final section of the survey helps us understand if some groups are experiencing care differently than others.



Q45 How old are you? (optional)

- 0-5 years old (1)
- 6-17 years old (2)
- 18-24 years old (3)
- 25-34 years old (4)
- 35-49 years old (5)
- 50-64 years old (6)
- 65-79 years old (7)
- 80+ years old (8)



Q46 **What gender do you identify with?** (optional)

- Woman/girl (1)
  - Man/boy (2)
  - Transgender woman/girl (3)
  - Transgender man/boy (4)
  - Non-binary (for example gender queer, 2-spirit) (5)
  - Identity not listed (please specify) (6)
- 
- Prefer not to answer (7)



Q47 **What is your highest level of education?** (optional)

- Elementary school or less (1)
- Some High school (2)
- High School Diploma (3)
- College or University Diploma Degree (4)
- Graduate or Professional Degree (5)



1  
2  
3 **Q48 Do you have trouble making ends meet (money problems) at the end of the**  
4 **month?** (optional)  
5

- 6  
7  Yes (1)  
8  
9  No (2)  
10  
11  I don't know (3)  
12  
13  Prefer not to answer (4)  
14  
15  
16
- 



17  
18  
19  
20  
21 **Q49 Were you born in Canada?** (optional)  
22

- 23  Yes (1)  
24  
25  No (2)  
26  
27  
28
- 

29  
30 *Display This Question:*

31 *If DFCM5c.5 = No*  
32

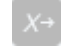

33  
34  
35  
36 **Q50 Did you arrive in Canada in the last 10 years?** (optional)  
37

- 38  Yes (1)  
39  
40  No (2)  
41  
42  
43
- 

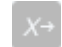

1  
2  
3 **Q51 What language would you prefer speaking with your primary care**  
4 **provider?** (optional)  
5

6  
7  English (1)  
8

9  French (2)  
10

11  Other (please specify): (3) \_\_\_\_\_  
12  
13  
14



17  
18 **Q52 In general, would you say your health is:** (optional)  
19

20  
21  Excellent (1)  
22

23  Very Good (2)  
24

25  Good (3)  
26

27  Fair (4)  
28

29  Poor (5)  
30  
31  
32  
33



36  
37 **Q53 What is your postal code?** (optional)  
38

39 \_\_\_\_\_  
40  
41  
42



1  
2  
3  
4  
5  
6  
7  
8  
9  
10  
11  
12  
13  
14  
15  
16  
17  
18  
19  
20  
21  
22  
23  
24  
25  
26  
27  
28  
29  
30  
31  
32  
33  
34  
35  
36  
37  
38  
39  
40  
41  
42  
43  
44  
45  
46  
47  
48  
49  
50  
51  
52  
53  
54  
55  
56  
57  
58  
59  
60

Q54 Which primary care provider do you usually see? (optional)

- Staff Physician (1)
- Resident Physician (2)
- Nurse Practitioner (3)
- Unsure (4)

End of Block: Block 5c - Yourself

---

Start of Block: End of Survey

Q55 Thank you for spending the time to complete this survey. Note: Please click "Submit" to record all your answers.

End of Block: End of Survey

---

For peer review only

1  
2  
3 **SUPPLEMENTARY FILE 2: Site Demographics**  
4  
5  
6

7

| Site name                                                                     | City        | Number of surveys sent<br>(N= 32, 307) | Number of responses<br>(N=7,532) | Response Rate<br>(%) |
|-------------------------------------------------------------------------------|-------------|----------------------------------------|----------------------------------|----------------------|
| 8 <b>Barrie and Community Family Health Team</b>                              | Barrie      | 748                                    | 279                              | 37%                  |
| 9 <b>Credit Valley Family Health Team</b>                                     | Mississauga | 2,056                                  | 645                              | 31%                  |
| 10 <b>Health for All Family Health Team</b>                                   | Markham     | 1,900                                  | 535                              | 28%                  |
| 11 <b>Mount Sinai Academic Family Health Team</b>                             | Toronto     | 2,100                                  | 391                              | 19%                  |
| 12 <b>Southlake Family Health Team</b>                                        | Newmarket   | 1,968                                  | 735                              | 37%                  |
| 13 <b>North York Family Health Team</b>                                       | North York  | 1,466                                  | 390                              | 27%                  |
| 14 <b>Platinum Medical Family Health Organization</b>                         | Scarborough | 1,792                                  | 222                              | 12%                  |
| 15 <b>Sunnybrook Academic Family Health Team</b>                              | Toronto     | 1,447                                  | 409                              | 28%                  |
| 16 <b>St. Joseph's Health Centre Family Medicine/Urban Family Health Team</b> | Toronto     | 1,135                                  | 265                              | 23%                  |

17  
18  
19  
20  
21  
22  
23  
24  
25  
26  
27  
28  
29  
30  
31  
32  
33  
34  
35  
36  
37  
38  
39  
40  
41  
42  
43  
44  
45  
46  
47



1  
2  
3  
4  
5  
6  
7  
8  
9  
10  
11  
12  
13  
14  
15  
16  
17  
18  
19  
20  
21  
22  
23  
24  
25  
26  
27  
28  
29  
30  
31  
32  
33  
34  
35  
36  
37  
38  
39  
40  
41  
42  
43  
44  
45  
46  
47

|                                                               |             |       |      |     |
|---------------------------------------------------------------|-------------|-------|------|-----|
| <b>St. Michael's Hospital Academic Family Health Team</b>     | Toronto     | 5,180 | 1337 | 26% |
| <b>South East Toronto Family Health Team</b>                  | Toronto     | 5,244 | 591  | 11% |
| <b>Summerville Family Health Team</b>                         | Mississauga | 5,070 | 1426 | 28% |
| <b>Women's College Hospital Family Practice Health Centre</b> | Toronto     | 2,201 | 307  | 14% |

\*Created by the authors.

For peer review only

### Checklist for Reporting Results of Internet E-Surveys (CHERRIES)

| <b>Checklist Item</b>            | <b>Explanation</b>                                                                                                                                                                                                                                                                                                                                                                                                                           | <b>Page Number</b> |
|----------------------------------|----------------------------------------------------------------------------------------------------------------------------------------------------------------------------------------------------------------------------------------------------------------------------------------------------------------------------------------------------------------------------------------------------------------------------------------------|--------------------|
| Describe survey design           | Describe target population, sample frame. Is the sample a convenience sample? (In "open" surveys this is most likely.)                                                                                                                                                                                                                                                                                                                       | 5                  |
| IRB approval                     | Mention whether the study has been approved by an IRB.                                                                                                                                                                                                                                                                                                                                                                                       | 6                  |
| Informed consent                 | Describe the informed consent process. Where were the participants told the length of time of the survey, which data were stored and where and for how long, who the investigator was, and the purpose of the study?                                                                                                                                                                                                                         | 7                  |
| Data protection                  | If any personal information was collected or stored, describe what mechanisms were used to protect unauthorized access.                                                                                                                                                                                                                                                                                                                      | 7                  |
| Development and testing          | State how the survey was developed, including whether the usability and technical functionality of the electronic questionnaire had been tested before fielding the questionnaire.                                                                                                                                                                                                                                                           | 7                  |
| Open survey versus closed survey | An "open survey" is a survey open for each visitor of a site, while a closed survey is only open to a sample which the investigator knows (password-protected survey).                                                                                                                                                                                                                                                                       | 6                  |
| Contact mode                     | Indicate whether or not the initial contact with the potential participants was made on the Internet. (Investigators may also send out questionnaires by mail and allow for Web-based data entry.)                                                                                                                                                                                                                                           | 6                  |
| Advertising the survey           | How/where was the survey announced or advertised? Some examples are offline media (newspapers), or online (mailing lists – If yes, which ones?) or banner ads (Where were these banner ads posted and what did they look like?). It is important to know the wording of the announcement as it will heavily influence who chooses to participate. Ideally the survey announcement should be published as an appendix.                        | 6                  |
| Web/E-mail                       | State the type of e-survey (eg, one posted on a Web site, or one sent out through e-mail). If it is an e-mail survey, were the responses entered manually into a database, or was there an automatic method for capturing responses?                                                                                                                                                                                                         | 6                  |
| Context                          | Describe the Web site (for mailing list/newsgroup) in which the survey was posted. What is the Web site about, who is visiting it, what are visitors normally looking for? Discuss to what degree the content of the Web site could pre-select the sample or influence the results. For example, a survey about vaccination on a anti-immunization Web site will have different results from a Web survey conducted on a government Web site | n/a                |
| Mandatory/voluntary              | Was it a mandatory survey to be filled in by every visitor who wanted to enter the Web site, or was it a voluntary survey?                                                                                                                                                                                                                                                                                                                   | n/a                |
| Incentives                       | Were any incentives offered (eg, monetary, prizes, or non-monetary incentives such as an offer to provide the survey results)?                                                                                                                                                                                                                                                                                                               | n/a                |

|    |                                                                                                           |                                                                                                                                                                                                                                                                                                                                                                                                                                                                                               |     |
|----|-----------------------------------------------------------------------------------------------------------|-----------------------------------------------------------------------------------------------------------------------------------------------------------------------------------------------------------------------------------------------------------------------------------------------------------------------------------------------------------------------------------------------------------------------------------------------------------------------------------------------|-----|
| 1  | Time/Date                                                                                                 | In what timeframe were the data collected?                                                                                                                                                                                                                                                                                                                                                                                                                                                    | 6   |
| 2  | Randomization of items or questionnaires                                                                  | To prevent biases items can be randomized or alternated.                                                                                                                                                                                                                                                                                                                                                                                                                                      | n/a |
| 3  | Adaptive questioning                                                                                      | Use adaptive questioning (certain items, or only conditionally displayed based on responses to other items) to reduce number and complexity of the questions.                                                                                                                                                                                                                                                                                                                                 | n/a |
| 4  | Number of Items                                                                                           | What was the number of questionnaire items per page? The number of items is an important factor for the completion rate.                                                                                                                                                                                                                                                                                                                                                                      | 7   |
| 5  | Number of screens (pages)                                                                                 | Over how many pages was the questionnaire distributed? The number of items is an important factor for the completion rate.                                                                                                                                                                                                                                                                                                                                                                    | n/a |
| 6  | Completeness check                                                                                        | It is technically possible to do consistency or completeness checks before the questionnaire is submitted. Was this done, and if "yes", how (usually JavaScript)? An alternative is to check for completeness after the questionnaire has been submitted (and highlight mandatory items). If this has been done, it should be reported. All items should provide a non-response option such as "not applicable" or "rather not say", and selection of one response option should be enforced. | n/a |
| 7  | Review step                                                                                               | State whether respondents were able to review and change their answers (eg, through a Back button or a Review step which displays a summary of the responses and asks the respondents if they are correct).                                                                                                                                                                                                                                                                                   | 6   |
| 8  | Unique site visitor                                                                                       | If you provide view rates or participation rates, you need to define how you determined a unique visitor. There are different techniques available, based on IP addresses or cookies or both.                                                                                                                                                                                                                                                                                                 | n/a |
| 9  | View rate (Ratio of unique survey visitors/unique site visitors)                                          | Requires counting unique visitors to the first page of the survey, divided by the number of unique site visitors (not page views!). It is not unusual to have view rates of less than 0.1 % if the survey is voluntary.                                                                                                                                                                                                                                                                       | n/a |
| 10 | Participation rate (Ratio of unique visitors who agreed to participate/unique first survey page visitors) | Count the unique number of people who filled in the first survey page (or agreed to participate, for example by checking a checkbox), divided by visitors who visit the first page of the survey (or the informed consents page, if present). This can also be called "recruitment" rate.                                                                                                                                                                                                     | n/a |
| 11 | Completion rate (Ratio of users who finished the survey/users who                                         | The number of people submitting the last questionnaire page, divided by the number of people who agreed to participate (or submitted the first survey page). This is only relevant if there is a separate "informed consent" page or if the survey goes over several pages. This is a measure for attrition. Note that                                                                                                                                                                        | 8   |

|    |                                                     |                                                                                                                                                                                                                                                                                                                                                                                                                                                                                                                                                                            |     |
|----|-----------------------------------------------------|----------------------------------------------------------------------------------------------------------------------------------------------------------------------------------------------------------------------------------------------------------------------------------------------------------------------------------------------------------------------------------------------------------------------------------------------------------------------------------------------------------------------------------------------------------------------------|-----|
| 1  | agreed to participate)                              | "completion" can involve leaving questionnaire items blank. This is not a measure for how completely questionnaires were filled in. (If you need a measure for this, use the word "completeness rate".)                                                                                                                                                                                                                                                                                                                                                                    |     |
| 2  | 3                                                   | 4                                                                                                                                                                                                                                                                                                                                                                                                                                                                                                                                                                          | 5   |
| 6  | Cookies used                                        | Indicate whether cookies were used to assign a unique user identifier to each client computer. If so, mention the page on which the cookie was set and read, and how long the cookie was valid. Were duplicate entries avoided by preventing users access to the survey twice; or were duplicate database entries having the same user ID eliminated before analysis? In the latter case, which entries were kept for analysis (eg, the first entry or the most recent)?                                                                                                   | n/a |
| 7  | 8                                                   | 9                                                                                                                                                                                                                                                                                                                                                                                                                                                                                                                                                                          | 10  |
| 11 | IP check                                            | Indicate whether the IP address of the client computer was used to identify potential duplicate entries from the same user. If so, mention the period of time for which no two entries from the same IP address were allowed (eg, 24 hours). Were duplicate entries avoided by preventing users with the same IP address access to the survey twice; or were duplicate database entries having the same IP address within a given period of time eliminated before analysis? If the latter, which entries were kept for analysis (eg, the first entry or the most recent)? | n/a |
| 12 | 13                                                  | 14                                                                                                                                                                                                                                                                                                                                                                                                                                                                                                                                                                         | 15  |
| 16 | Log file analysis                                   | Indicate whether other techniques to analyze the log file for identification of multiple entries were used. If so, please describe.                                                                                                                                                                                                                                                                                                                                                                                                                                        | n/a |
| 17 | 18                                                  | 19                                                                                                                                                                                                                                                                                                                                                                                                                                                                                                                                                                         | 20  |
| 21 | Registration                                        | In "closed" (non-open) surveys, users need to login first and it is easier to prevent duplicate entries from the same user. Describe how this was done. For example, was the survey never displayed a second time once the user had filled it in, or was the username stored together with the survey results and later eliminated? If the latter, which entries were kept for analysis (eg, the first entry or the most recent)?                                                                                                                                          | n/a |
| 22 | 23                                                  | 24                                                                                                                                                                                                                                                                                                                                                                                                                                                                                                                                                                         | 25  |
| 26 | Handling of incomplete questionnaires               | Were only completed questionnaires analyzed? Were questionnaires which terminated early (where, for example, users did not go through all questionnaire pages) also analyzed?                                                                                                                                                                                                                                                                                                                                                                                              | 7   |
| 27 | 28                                                  | 29                                                                                                                                                                                                                                                                                                                                                                                                                                                                                                                                                                         | 30  |
| 31 | Questionnaires submitted with an atypical timestamp | Some investigators may measure the time people needed to fill in a questionnaire and exclude questionnaires that were submitted too soon. Specify the timeframe that was used as a cut-off point, and describe how this point was determined.                                                                                                                                                                                                                                                                                                                              | n/a |
| 32 | 33                                                  | 34                                                                                                                                                                                                                                                                                                                                                                                                                                                                                                                                                                         | 35  |
| 36 | Statistical correction                              | Indicate whether any methods such as weighting of items or propensity scores have been used to adjust for the non-representative sample; if so, please describe the methods.                                                                                                                                                                                                                                                                                                                                                                                               | n/a |
| 37 | 38                                                  | 39                                                                                                                                                                                                                                                                                                                                                                                                                                                                                                                                                                         | 40  |
| 41 | 42                                                  | 43                                                                                                                                                                                                                                                                                                                                                                                                                                                                                                                                                                         | 44  |
| 45 | 46                                                  |                                                                                                                                                                                                                                                                                                                                                                                                                                                                                                                                                                            |     |

This checklist has been modified from Eysenbach G. Improving the quality of Web surveys: the Checklist for Reporting Results of Internet E-Surveys (CHERRIES). J Med Internet Res. 2004 Sep 29;6(3):e34 [erratum in J Med Internet Res. 2012; 14(1): e8.]. Article available at <https://www.jmir.org/2004/3/e34/>; erratum available <https://www.jmir.org/2012/1/e8/>. Copyright ©Gunther Eysenbach. Originally published in the [Journal of Medical Internet Research](#), 29.9.2004 and 04.01.2012.

1  
2  
3  
4  
5  
6  
7  
8  
9  
10  
11  
12  
13  
14  
15  
16  
17  
18  
19  
20  
21  
22  
23  
24  
25  
26  
27  
28  
29  
30  
31  
32  
33  
34  
35  
36  
37  
38  
39  
40  
41  
42  
43  
44  
45  
46

This is an open-access article distributed under the terms of the Creative Commons Attribution License (<https://creativecommons.org/licenses/by/2.0/>), which permits unrestricted use, distribution, and reproduction in any medium, provided the original work, first published in the Journal of Medical Internet Research, is properly cited.

For peer review only

# BMJ Open

## Sociodemographic differences in patient experience with primary care during COVID-19: results from a cross-sectional survey in Ontario, Canada

|                                 |                                                                                                                                                                                                                                                                                                                                                                                                                                                                                                                                                                                                                                                                                                                                                                                                                                                                                                                                                                                                                                                                                                                                                                                                                                                                                                                                                                                                                                                                                                                                                                                                                                                                                                                                                                                                                                                                                                                                                                                                                 |
|---------------------------------|-----------------------------------------------------------------------------------------------------------------------------------------------------------------------------------------------------------------------------------------------------------------------------------------------------------------------------------------------------------------------------------------------------------------------------------------------------------------------------------------------------------------------------------------------------------------------------------------------------------------------------------------------------------------------------------------------------------------------------------------------------------------------------------------------------------------------------------------------------------------------------------------------------------------------------------------------------------------------------------------------------------------------------------------------------------------------------------------------------------------------------------------------------------------------------------------------------------------------------------------------------------------------------------------------------------------------------------------------------------------------------------------------------------------------------------------------------------------------------------------------------------------------------------------------------------------------------------------------------------------------------------------------------------------------------------------------------------------------------------------------------------------------------------------------------------------------------------------------------------------------------------------------------------------------------------------------------------------------------------------------------------------|
| Journal:                        | <i>BMJ Open</i>                                                                                                                                                                                                                                                                                                                                                                                                                                                                                                                                                                                                                                                                                                                                                                                                                                                                                                                                                                                                                                                                                                                                                                                                                                                                                                                                                                                                                                                                                                                                                                                                                                                                                                                                                                                                                                                                                                                                                                                                 |
| Manuscript ID                   | bmjopen-2021-056868.R2                                                                                                                                                                                                                                                                                                                                                                                                                                                                                                                                                                                                                                                                                                                                                                                                                                                                                                                                                                                                                                                                                                                                                                                                                                                                                                                                                                                                                                                                                                                                                                                                                                                                                                                                                                                                                                                                                                                                                                                          |
| Article Type:                   | Original research                                                                                                                                                                                                                                                                                                                                                                                                                                                                                                                                                                                                                                                                                                                                                                                                                                                                                                                                                                                                                                                                                                                                                                                                                                                                                                                                                                                                                                                                                                                                                                                                                                                                                                                                                                                                                                                                                                                                                                                               |
| Date Submitted by the Author:   | 30-Mar-2022                                                                                                                                                                                                                                                                                                                                                                                                                                                                                                                                                                                                                                                                                                                                                                                                                                                                                                                                                                                                                                                                                                                                                                                                                                                                                                                                                                                                                                                                                                                                                                                                                                                                                                                                                                                                                                                                                                                                                                                                     |
| Complete List of Authors:       | <p>Agarwal, Payal; Women's College Hospital Institute for Health System Solutions and Virtual Care; University of Toronto Department of Family and Community Medicine</p> <p>Wang, Ri; St Michael's Hospital, MAP Centre for Urban Health Solutions</p> <p>Meaney, Christopher; University of Toronto Temerty Faculty of Medicine, Department of Family and Community Medicine</p> <p>Walji, Sakina; University of Toronto Department of Family and Community Medicine; Mount Sinai Academic Family Health Team</p> <p>Damji, Ali; University of Toronto Department of Family and Community Medicine; Credit Valley Family Health Team</p> <p>Gill, Navsheer; Southlake Regional Health Centre; University of Toronto Department of Family and Community Medicine</p> <p>Yip, Gina; University of Toronto Department of Family and Community Medicine; Markham Stouffville Hospital</p> <p>Elman, Debbie; University of Toronto Department of Family and Community Medicine; Sunnybrook Health Sciences Centre, Department of Family and Community Medicine</p> <p>Florindo, Tiffiany; University of Toronto, Department of Family and Community Medicine; North York General Hospital</p> <p>Fung, Susanna; University of Toronto, Department of Family and Community Medicine; Scarborough Health Network</p> <p>Witty, Melissa; University of Toronto, Department of Family and Community Medicine; Barrie and Community Family Health Team</p> <p>Pham, Thuy-Nga; University of Toronto, Department of Family and Community Medicine; Toronto East Health Network Michael Garron Hospital</p> <p>Ramji, Noor; University of Toronto, Department of Family and Community Medicine; St Michael's Hospital Department of Family and Community Medicine and St Michael's Academic Family Health Team</p> <p>Kiran, Tara; University of Toronto, Department of Family and Community Medicine; St Michael's Hospital Department of Family and Community Medicine and St Michael's Academic Family Health Team</p> |
| <b>Primary Subject Heading</b>: | General practice / Family practice                                                                                                                                                                                                                                                                                                                                                                                                                                                                                                                                                                                                                                                                                                                                                                                                                                                                                                                                                                                                                                                                                                                                                                                                                                                                                                                                                                                                                                                                                                                                                                                                                                                                                                                                                                                                                                                                                                                                                                              |
| Secondary Subject Heading:      | Communication, Health policy, Patient-centred medicine                                                                                                                                                                                                                                                                                                                                                                                                                                                                                                                                                                                                                                                                                                                                                                                                                                                                                                                                                                                                                                                                                                                                                                                                                                                                                                                                                                                                                                                                                                                                                                                                                                                                                                                                                                                                                                                                                                                                                          |
| Keywords:                       | COVID-19, PRIMARY CARE, Quality in health care < HEALTH SERVICES ADMINISTRATION & MANAGEMENT                                                                                                                                                                                                                                                                                                                                                                                                                                                                                                                                                                                                                                                                                                                                                                                                                                                                                                                                                                                                                                                                                                                                                                                                                                                                                                                                                                                                                                                                                                                                                                                                                                                                                                                                                                                                                                                                                                                    |

1  
2  
3  
4  
5  
6  
7  
8  
9  
10  
11  
12  
13  
14  
15  
16  
17  
18  
19  
20  
21  
22  
23  
24  
25  
26  
27  
28  
29  
30  
31  
32  
33  
34  
35  
36  
37  
38  
39  
40  
41  
42  
43  
44  
45  
46  
47  
48  
49  
50  
51  
52  
53  
54  
55  
56  
57  
58  
59  
60



SCHOLARONE™  
Manuscripts



I, the Submitting Author has the right to grant and does grant on behalf of all authors of the Work (as defined in the below author licence), an exclusive licence and/or a non-exclusive licence for contributions from authors who are: i) UK Crown employees; ii) where BMJ has agreed a CC-BY licence shall apply, and/or iii) in accordance with the terms applicable for US Federal Government officers or employees acting as part of their official duties; on a worldwide, perpetual, irrevocable, royalty-free basis to BMJ Publishing Group Ltd ("BMJ") its licensees and where the relevant Journal is co-owned by BMJ to the co-owners of the Journal, to publish the Work in this journal and any other BMJ products and to exploit all rights, as set out in our [licence](#).

The Submitting Author accepts and understands that any supply made under these terms is made by BMJ to the Submitting Author unless you are acting as an employee on behalf of your employer or a postgraduate student of an affiliated institution which is paying any applicable article publishing charge ("APC") for Open Access articles. Where the Submitting Author wishes to make the Work available on an Open Access basis (and intends to pay the relevant APC), the terms of reuse of such Open Access shall be governed by a Creative Commons licence – details of these licences and which [Creative Commons](#) licence will apply to this Work are set out in our licence referred to above.

Other than as permitted in any relevant BMJ Author's Self Archiving Policies, I confirm this Work has not been accepted for publication elsewhere, is not being considered for publication elsewhere and does not duplicate material already published. I confirm all authors consent to publication of this Work and authorise the granting of this licence.



1  
2  
3  
4 **Sociodemographic differences in patient experience with primary care during COVID-19: results**  
5 **from a cross-sectional survey in Ontario, Canada**  
6  
7

8 Payal Agarwal<sup>1,2</sup> MD  
9

10  
11 Rick Wang<sup>3</sup> MMath  
12  
13

14  
15 Christopher Meaney<sup>1</sup> MSc  
16  
17

18 Sakina Walji<sup>1</sup> MD  
19  
20

21  
22 Ali Damji<sup>1</sup> MD  
23  
24

25 Navsheer Gill Toor<sup>1</sup> MD  
26  
27

28  
29 Gina Yip<sup>1</sup> MD  
30  
31

32 Debbie Elman<sup>1</sup> MD  
33  
34

35 Tiffiany Florindo<sup>1</sup> MD  
36  
37

38  
39 Susanna Fung<sup>1</sup> MD  
40  
41

42 Melissa Witty<sup>1</sup> MD  
43  
44

45 Thuy Nga Pham<sup>1</sup> MD  
46  
47

48  
49 Noor Ramji<sup>1,4</sup> MD  
50  
51

52 Tara Kiran<sup>1,3,4,5</sup> MD, MSc  
53

54 <sup>1</sup>Department of Family and Community Medicine, Temerty Faculty of Medicine, University  
55 of Toronto, Toronto, Ontario, Canada  
56  
57  
58  
59

1  
2  
3  
4 <sup>2</sup>Women's College Hospital Institute for Health System Solutions and Virtual Care, Women's  
5 College Hospital, Toronto, Ontario, Canada  
6

7  
8 <sup>3</sup>MAP Centre for Urban Health Solutions, Li Ka Shing Knowledge Institute, St. Michael's  
9 Hospital, Toronto, Canada  
10

11 <sup>4</sup>Department of Family and Community Medicine, St. Michael's Hospital, Toronto, Ontario,  
12 Canada  
13

14 <sup>5</sup>Institute of Health Policy, Management and Evaluation, University of Toronto, Toronto,  
15 Ontario, Canada  
16  
17  
18  
19

20 **Corresponding author:**

21 Tara Kiran, MD, MSc, MAP Centre for Urban Health Solutions, St. Michael's Hospital, Unity  
22 Health Toronto, 30 Bond St., Toronto, ON Canada M5B 1W8  
23 [tara.kiran@utoronto.ca](mailto:tara.kiran@utoronto.ca), phone 416-864-3011, fax 416-864-3099  
24

25  
26 **Keywords:** COVID-19, Primary Care, Quality in health care, Health services administration &  
27 management  
28  
29  
30

31 **Manuscript Word Count:** 2579  
32  
33  
34  
35  
36  
37

38 **ABSTRACT**  
39  
40

41 **Purpose:** We sought to understand patients' care-seeking behaviours early in the pandemic, their  
42  
43  
44  
45 use and views of different virtual care modalities, and whether these differed by  
46  
47  
48 sociodemographic factors.  
49  
50

51 **Methods:** We conducted a multi-site cross-sectional patient experience survey at thirteen  
52  
53  
54  
55 academic primary care teaching practices between May and June of 2020. An anonymized link  
56  
57  
58  
59

1  
2  
3  
4 to an electronic survey was sent to a subset of patients with a valid email address on file;  
5  
6  
7 sampling was based on birth month. For each question, the proportion of respondents who  
8  
9  
10 selected each response was calculated, followed by a comparison by sociodemographic  
11  
12  
13 characteristics using chi-squared tests.  
14

15  
16  
17 **Results:** In total, 7482 participants responded to the survey. Most received care from their  
18  
19  
20 primary care clinic during the pandemic (67.7%, 5068/7482), the majority via phone (82.5%,  
21  
22  
23 4195/5086). Among those who received care, 30.53% (1509/4943) stated that they delayed  
24  
25  
26 seeking care because of the pandemic. Most participants reported a high degree of comfort with  
27  
28  
29 phone (92.4%, 3824/4139), video (95.2%, 238/250) and email or messaging (91.3%, 794/870).  
30  
31  
32 However, those reporting difficulty making ends meet, poor or fair health, and arriving in  
33  
34  
35 Canada in the last 10 years reported lower levels of comfort with virtual care and fewer wanted  
36  
37  
38 their practice to continue offering virtual options after the pandemic.  
39  
40  
41  
42

43  
44 **Conclusions:** Our study suggest that newcomers, people living with a lower income, and those  
45  
46  
47 reporting poor or fair health have a stronger preference and comfort for in-person primary care.  
48  
49  
50 Further research should explore potential barriers to virtual care and how these could be  
51  
52  
53 addressed.  
54  
55  
56  
57  
58  
59  
60

## ARTICLE SUMMARY

### Strengths and Limitations of this study

- Our study included a large sample of respondents from multiple clinics across both urban and suburban communities; however, all clinics were academic practices within the Greater Toronto Area which may limit generalizability of findings.
- Patients were randomly sampled using birth month; however, our findings are open to selection bias because of the response rate, mode of delivery (email), and the survey being offered primarily in English.
- Demographics of our sample confirm that we reached a diverse group of patients.
- Survey questions were relevant to COVID-19 and informed by primary care leaders and patients.
- Our survey reports on experience during the early phase of the pandemic and patients' comfort and preferences may have evolved since.

## INTRODUCTION

1  
2  
3  
4 The COVID-19 pandemic has dramatically shifted the way health care is delivered and  
5  
6  
7 experienced by patients in many developed nations. Primary care practices in Canada, the US  
8  
9  
10 and elsewhere, rapidly switched to a virtual first approach—including the use of video, phone  
11  
12  
13 and secure messaging—to limit transmission of the SARS-CoV2 virus and conserve Personal  
14  
15  
16 Protective Equipment<sup>1,2,3,4,5</sup>. A study from Ontario, Canada found that shortly after the pandemic  
17  
18  
19 was declared, in-office visits reduced by 79% and virtual care conducted by phone or video  
20  
21  
22 increased 56-fold, comprising 71% of primary care physician visits<sup>6</sup>. While this approach  
23  
24  
25 supported immediate public health goals, its impact on access, receipt of patient-centred  
26  
27  
28 evidence-based care and long-term health outcomes is unclear<sup>7</sup>. As health systems consider what  
29  
30  
31 the “new normal” should look like, an examination of these impacts will be crucial.  
32  
33  
34  
35  
36  
37  
38  
39  
40  
41  
42  
43  
44  
45  
46  
47  
48  
49  
50  
51  
52  
53  
54  
55  
56  
57  
58  
59  
60

This shift in care delivery has raised several concerns, including potential negative impacts on patient experience and access. Clinicians have noted anecdotally that patients with worrisome symptoms are delaying care<sup>8</sup>. Some note that the switch to virtual care may make care more accessible<sup>9-12</sup>, while others have highlighted barriers certain populations face in accessing virtual care<sup>13-16</sup>. Prior studies suggest patient characteristics including older age and lower income may

1  
2  
3 limit one's ability to benefit from digital health and virtual care services<sup>17-18</sup>. In addition, patients  
4  
5  
6  
7 may not have access to required technologies such as a phone or internet access<sup>19-20</sup>. Despite this,  
8  
9  
10 very little literature to date is available on patient experiences during the COVID-19 pandemic  
11  
12  
13 and how these differ by sociodemographic characteristics. Most existing studies on patient  
14  
15  
16  
17 experience during COVID-19 are from acute care, and do not stratify experience based on  
18  
19  
20 patient demographics<sup>21-25</sup>.  
21  
22  
23  
24  
25  
26

27 We conducted a patient survey at multiple academic primary care clinics in Ontario, Canada to  
28  
29  
30 better understand patient experience during COVID-19. We were interested in patients' care-  
31  
32  
33 seeking behaviours, their use and views of different virtual care modalities, and whether these  
34  
35  
36  
37 differed by sociodemographic factors.  
38  
39  
40  
41  
42  
43

## 44 **METHODS**

### 45 46 47 **Study design and setting** 48 49

50 We conducted a multi-site cross-sectional survey to understand patient experiences during the  
51  
52  
53  
54 COVID-19 pandemic at thirteen core teaching practices affiliated with the University of Toronto  
55  
56  
57  
58  
59  
60

1  
2  
3 Department of Family and Community Medicine situated in the Greater Toronto Area, a large,  
4  
5  
6 demographically diverse metropolitan area with more than 250 different ethnicities and half of  
7  
8  
9  
10 all residents being foreign-born<sup>26-27</sup>. Participating practices were located in Toronto and  
11  
12  
13 surrounding areas including Mississauga, Markham, and Barrie. Practices range in size from  
14  
15  
16 roughly 11 physicians serving 14,000 patients to 80 physicians serving 50,000 patients; some  
17  
18  
19 have multiple locations; one provides services in English and French. Physicians in all teaching  
20  
21  
22 practices are part of Family Health Organizations and formally enrol patients, have shared  
23  
24  
25 responsibility for after-hours care, and are paid primarily by age-sex adjusted capitation; twelve  
26  
27  
28 of the thirteen sites were part of Family Health Teams that included non-physician health  
29  
30  
31 professionals such as nurses, nurse practitioners, social workers and dieticians.  
32  
33  
34  
35  
36  
37  
38  
39  
40  
41  
42  
43  
44  
45  
46  
47  
48  
49  
50  
51  
52  
53  
54

40 The survey is an ongoing effort to directly inform quality improvement (QI) efforts at  
41  
42  
43 participating sites during COVID-19. The initiative was formally reviewed by institutional  
44  
45  
46  
47 authorities at Unity Health Toronto and deemed to neither require Research Ethics Board  
48  
49  
50 approval nor written informed consent from participants.  
51  
52  
53  
54

## 55 **Study Population and Recruitment**

56  
57  
58  
59  
60

1  
2  
3  
4 A link to an open electronic patient experience survey is emailed every quarter to a subset of  
5  
6  
7 patients with a valid email address on file; sampling each quarter is based on birth month with all  
8  
9  
10 eligible patients receiving a survey in a given year. The current analysis summarizes results of  
11  
12  
13 the first survey, which was sent to patients with a date of birth during the months of March, April  
14  
15  
16 or May. They were sent the survey between May and June of 2020 which corresponded with the  
17  
18  
19 end of the first wave of COVID-19 in the Toronto region<sup>28</sup>. Each site distributed an anonymized  
20  
21  
22 link to patients in the manner by which they usually communicate electronically to patients (i.e.  
23  
24  
25 by email or using a secure messaging service). In some cases, the email address on file may  
26  
27  
28 belong to a family member or caregiver to allow them the option of filling out the survey on  
29  
30  
31 behalf of the patient. Recruitment was done in English, with one site also doing recruitment and  
32  
33  
34 survey completion in French. No incentives were provided to participants.  
35  
36  
37  
38  
39  
40  
41  
42  
43

#### 44 **Survey Design**

45  
46  
47 The survey was developed collaboratively by family physicians who had a QI leadership role at  
48  
49  
50 participating sites, to support quality improvement efforts related to the COVID-19 pandemic.  
51  
52

53  
54 Where possible, questions were informed by existing surveys including the Commonwealth Fund  
55  
56  
57  
58  
59  
60



1  
2  
3  
4 International Health Policy Survey<sup>29-30</sup> and the Ontario Primary Care Experience Survey, which  
5  
6  
7 was developed as part of a larger Primary Care Performance Measurement strategy to measure  
8  
9  
10 the performance across 9 domains<sup>31-32</sup>. The survey went through several iterations based on  
11  
12  
13 feedback from practice QI teams, a survey methodologist, a biostatistician, patient education and  
14  
15  
16 engagement specialists, and patient and family advisors. A paragraph at the start of the survey  
17  
18  
19 outlined the purpose of the survey, the reason they were being asked to participate, and  
20  
21  
22 highlighted that the survey was voluntary and anonymous. The final survey was prepared using  
23  
24  
25  
26  
27 Qualtrics software, a digital platform to capture experience data, and included 43 potential  
28  
29  
30 questions over 5 thematic domains including: 1) seeking and delaying care, 2) use and comfort  
31  
32  
33 with virtual care, 3) urgent care access, 4) patient centeredness and 5) patient demographic and  
34  
35  
36 contextual factors. Participants could end the survey at any point and were able to review  
37  
38  
39 previously answered questions before submission. (See Supplementary file 1 for full survey)  
40  
41  
42  
43  
44

### 45 **Data Collection and Storage**

46  
47  
48 Data collected via the electronic survey were stored in Qualtrics. All data was downloaded onto  
49  
50  
51 a secure research server at the University of Toronto. A script was run to remove any potentially  
52  
53  
54 identifying information including 1) IP addresses, 2) Email addresses, 3) longitude/latitude  
55  
56  
57  
58  
59  
60

1  
2  
3  
4 coordinates and 4) any free text fields (which may contain unstructured protected health  
5  
6  
7 information).

## 13 **Statistical Analysis**

14  
15  
16  
17 We performed an initial descriptive statistics analysis on the responses of all participants across  
18  
19  
20 all sites who answered at least one question in the survey. For each question, we calculated the  
21  
22  
23 proportion of respondents who selected each response. We then compared patient responses by  
24  
25  
26 sociodemographic characteristics including age, gender, education, self-reported financial issues,  
27  
28  
29 immigration status, primary language, self-reported health, and usual primary care provider  
30  
31  
32 (PCP). P values were calculated using chi-squared tests and all data analysis was conducted  
33  
34  
35  
36  
37 using R version 4.0.

## 43 **Patient and Public Involvement**

44  
45  
46  
47 Patients and families at participating clinic sites informed the survey questions and methods and  
48  
49  
50 have been engaged in discussions about the results and potential next steps.  
51  
52  
53  
54  
55  
56  
57  
58  
59  
60

## RESULTS

The survey link was emailed to 32,307 patients at 13 practices (see Supplementary file 2). We present sociodemographic data (Table 1) on the 7482 participants who answered one or more questions in the survey (23.3% response rate). Sixty-five percent of respondents were female (4379/6713) and 78.3% (5159/6588) reported having a college, university or graduate degree. Nine percent of respondents (590/6556) reported trouble making ends meet at the end of the month, while 29.0% (1928/6656) were not born in Canada (with 16.9% of these having arrived in the last 10 years). Eight percent (553/6851) reported filling out the survey on behalf of a family member. Fifty-five surveys were completed in French.

### Care-seeking during COVID-19

Of all respondents, 67.7% (5068/7482) reported they received care in some way from their primary care clinic since the start of the pandemic. Financial status and self-reported health were significantly associated with care seeking behaviours during the pandemic ( $p < 0.001$ ); a higher proportion of patients who noted trouble making ends meet (yes: 74.8%, 441/590, no: 65.3%, 3396/5201, prefer not to answer: 68.0%, 520/765) and those with lower self-rated health (fair or

1  
2  
3  
4 poor: 76.9%, 752/978, excellent: 59.8%, 599/1002) reported receiving care during the study  
5  
6  
7 period. Of the 32.3% (2414/7482) of patients who did not receive care during the study period,  
8  
9  
10 the most commonly cited reasons were that patients had no health need (72.4%) and patients  
11  
12  
13 were worried about safety (9.5%).  
14  
15

16  
17  
18  
19  
20 Of the 5068 patients who reported receiving care at their primary care practice during the  
21  
22  
23 pandemic, 30.5% (1509/4943) stated that they delayed seeking care because of the pandemic.  
24  
25  
26  
27 Gender, age, education level, financial status and self-reported health status were significantly  
28  
29  
30 associated with differences in seeking care ( $p < 0.05$  for all); for example, a higher proportion of  
31  
32  
33 those with trouble making ends meet and those with lower self-rated health reported delays in  
34  
35  
36 seeking care (see Table 2).  
37  
38  
39  
40  
41  
42  
43

#### 44 **Use and perceptions of virtual care**

45

46  
47 Eighty-two percent (4195/5086) of participants reported receiving care by phone, 30.5%  
48  
49  
50 (1553/5086) in-person, 17.4% (886/5086) via email or secure messaging, and 5.1% (260/5086)  
51  
52  
53  
54 via video. Age, immigration status and self-rated health were significantly associated with  
55  
56  
57  
58  
59  
60

1  
2  
3 differences in receiving in-person care ( $p < 0.05$  for all); the proportion who reported receiving in-  
4  
5  
6  
7 person care was lower among those over the age of 65, those not born in Canada and those with  
8  
9  
10 lower self-rated health (Table 3). Women, young adults, those who rate their health as fair or  
11  
12  
13 poor and those who reported trouble making ends meet reported higher rates of phone use (see  
14  
15  
16 Table 3). Age and education level were significantly associated with differences in using email  
17  
18  
19 and secure messaging ( $p < 0.001$  for all); those over the age of 65 (16.9%, 269/1592) and those  
20  
21  
22 with a high school degree or less (13.5%, 130/962) reported less use of email and secure  
23  
24  
25  
26  
27 messaging relative to other groups.  
28  
29  
30  
31  
32  
33

34 Overall, most respondents indicated they were extremely or somewhat comfortable with the  
35  
36  
37 privacy and security of virtual modalities including phone (92.4%, 3824/4139), video (95.2%,  
38  
39  
40 238/250) and email or secure messaging (91.3%, 794/870). Financial status, immigration status  
41  
42  
43 and self-reported health status were significantly associated with differences in comfort with  
44  
45  
46  
47 virtual care use ( $p < 0.05$  for all); those having trouble making ends meet, those not born in  
48  
49  
50 Canada and those rating their health as fair or poor reported lower levels of comfort with phone  
51  
52  
53  
54 calls and email or secure messaging relative to other groups (see Table 4).  
55  
56  
57  
58  
59  
60

## Future preferences for virtual care

Seventy-five percent (3798/5068), 52.2% (2644/5068), and 42.9% (2172/5068) of respondents said they wanted their practice to continue offering phone, email/secure messaging, and video after the pandemic, respectively. Age, education status, financial status, immigration status and self-reported health status were significantly associated with differences in wanting ongoing use of each of the three virtual care modalities ( $p < 0.05$  for all); those over age 65, those whose education was high school or less, those reporting yes or “I don’t know” when asked about difficulty making ends meet, those born outside Canada, and those in fair or poor health reported the lowest desire for the three virtual care modalities to continue after the pandemic compared to other groups (see Table 5).

## DISCUSSION

Our analysis of more than 7400 patient experience surveys across 13 primary care clinics during the first months of the COVID-19 pandemic found important differences in care-seeking and comfort with virtual care based on patient income, self-reported health, and other demographic

1  
2  
3 characteristics. Most participants received care from their primary care clinic in some way during  
4  
5  
6 the study period; however, almost a third who sought care reported they delayed it due to  
7  
8  
9 concerns about the pandemic. Patients who had trouble making ends meet and those who  
10  
11 reported their health as fair or poor were more likely to seek care during the pandemic yet were  
12  
13 also more likely to report they delayed seeking care. Patient generally reported a high degree of  
14  
15 comfort with phone, video and email or secure messaging. But, those reporting “yes” or “don’t  
16  
17 know/prefer not to answer” when asked about difficulty making ends meet, poor or fair health,  
18  
19 and arriving in Canada in the last 10 years reported lower levels of comfort and less likely to  
20  
21 want their practice to continue offering these virtual options.  
22  
23  
24  
25  
26  
27  
28  
29  
30  
31  
32  
33  
34  
35  
36

37 Our results, similar to other emerging literature, suggests a complex relationship between the  
38  
39 social determinants of health and patient comfort and preference regarding accessing care  
40  
41 through virtual tools. A US-based study prior to the pandemic found that while younger patients  
42  
43 and those with physical disabilities were more likely to use video visits to access care, those who  
44  
45 reported lower incomes and lived in rural populations were less likely to use this modality<sup>33</sup>. A  
46  
47 recent US-based primary care study found that after care shifted to a virtual-first approach during  
48  
49  
50  
51  
52  
53  
54  
55  
56  
57  
58  
59  
60

1  
2  
3  
4 the pandemic, a significantly smaller proportion of visits overall were with people who were low  
5  
6  
7 income, non-white, or non-English speakers<sup>34</sup>. However, a Canadian-based study found that  
8  
9  
10 similar to our participants, those with the highest care needs (older, multiple co-morbidities),  
11  
12  
13 were more likely to access primary care during the early months of the pandemic compared to  
14  
15  
16 other groups<sup>6</sup>.  
17  
18  
19  
20  
21  
22  
23

24 As many predict virtual care will continue to be a part of care delivery post-pandemic, this study  
25  
26  
27 highlights the importance of integrating patient experience data into future care delivery  
28  
29  
30 planning. Similar to other recently published data<sup>6,35,36</sup>, our data indicates phone was by far the  
31  
32  
33 most utilized modality of virtual care and overall, participants were comfortable using virtual  
34  
35  
36 modalities to receive care. Patients who report financial troubles and poor health, had a higher  
37  
38  
39 percentage reporting accessing care (virtually and in person) during the pandemic compared to  
40  
41  
42 other groups; however, they reported greater concerns with the privacy and security of virtual  
43  
44  
45 care and less desire for virtual care to be an ongoing part of their primary care experience. This  
46  
47  
48 suggests that while public health measures may have pushed populations with the highest care  
49  
50  
51 needs to use virtual care, these modalities did not provide all patients with an equitable, patient-  
52  
53  
54  
55  
56  
57  
58  
59  
60



1  
2  
3 centred care experience. Further research should explore reasons behind the relative discomfort  
4  
5  
6  
7 and low interest in virtual care and how barriers could be addressed. While access to technology  
8  
9  
10 may be part of this problem, other factors such as health and digital literacy, and support from  
11  
12  
13 peers and health care providers may also be significant<sup>37</sup>. Without further patient experience and  
14  
15  
16 demographic data to understand the ongoing use of virtual care, we risk leaving behind those  
17  
18  
19  
20 who need care most.  
21  
22  
23  
24  
25  
26

### 27 **Strengths and Limitations**

28  
29  
30 Our study had several key strengths and limitations. Our study included a large sample of  
31  
32  
33 respondents from multiple clinics across both urban and suburban communities. Patients were  
34  
35  
36 randomly sampled using birth month. Survey questions were relevant to COVID-19 and  
37  
38  
39 informed by primary care leaders and patients. However, our findings are open to selection bias  
40  
41  
42 because of the response rate, mode of delivery, and the survey being offered primarily in  
43  
44  
45 English; however, demographics of our sample confirm that we reached a diverse group of  
46  
47  
48 patients. We found substantial differences in utilization and perspectives of virtual care by  
49  
50  
51 sociodemographic characteristics, but these may be an underestimate of true differences. Our  
52  
53  
54  
55  
56  
57  
58  
59  
60

1  
2  
3 survey reports on experience during the early phase of the pandemic and patients' comfort and  
4  
5  
6 preferences may have evolved since then. Finally, although our sample was taken from 13  
7  
8  
9 primary care practices, these were all academic practices in the Greater Toronto Area where  
10  
11  
12 physicians were paid by capitation which may limit the generalizability of the findings to other  
13  
14  
15 settings including rural or low resource settings.  
16  
17  
18  
19  
20  
21  
22

## 23 CONCLUSIONS

24  
25  
26 We found that sociodemographic characteristics impacted patients experience accessing and  
27  
28 receiving primary care during the early months of the COVID-19 pandemic. While most  
29  
30 patients were comfortable using virtual modalities, those having difficulty making ends meet,  
31  
32 reporting poor or fair health, and born outside of Canada being less likely to report comfort with  
33  
34 virtual modalities and less likely to want virtual care options to continue post-pandemic. Moving  
35  
36 forward, clinicians and system decision makers need to carefully consider how we integrate  
37  
38 virtual care into practices to ensure equity in access to primary care.  
39  
40  
41  
42  
43  
44  
45  
46  
47  
48  
49  
50  
51  
52  
53  
54  
55  
56  
57  
58  
59  
60

1  
2  
3  
4 **Contributors:** PA and TK conceived of and designed the study together. PA, CM, SW, AD, NG,  
5  
6  
7 GY, DE, TF, SF, MW, TP, NR, and TK designed the survey. RW and CM informed and  
8  
9  
10 conducted the analysis. PA, RW, CM, SW, AD, NG, GY, DE, TF, SF, MW, TP, NR, and TK  
11  
12  
13 helped interpret the data. PA drafted the manuscript with the support of TK and all authors  
14  
15  
16  
17 critically reviewed it. All authors read and approved the final manuscript.  
18  
19

20 **Acknowledgements:** We wish to thank Ali Damji, Debbie Elman, Frances Cousins, Jennifer  
21  
22  
23 Stulberg, Joanne Laine-Gossin, Karuna Gupta, Linda Weber, Melissa Witty, Navsheer Gill Toor,  
24  
25  
26  
27 Noor Ramji, Sakina Walji, Sam Tirkos, Susanna Fung, Susie Kim, Thuy Nga Pham, Tiffany  
28  
29  
30 Florindo for their support in developing and implementing the survey at their respective teaching  
31  
32  
33  
34 practices, Trish O'Brien and Kirsten Eldridge for their support with survey implementation  
35  
36  
37 across all sites, Danielle Martin for her feedback on our draft manuscript, and the patient partners  
38  
39  
40 who helped us refine the survey questions.  
41  
42  
43

44 **Competing interests:** None declared.  
45  
46

47 **Funding:** This research received no specific grant from any funding agency in the public,  
48  
49  
50 commercial, or not-for-profit sectors. Dr. Kiran is the Fidani Chair of Improvement and  
51  
52  
53 Innovation in Family Medicine at the University of Toronto and is supported as a Clinician  
54  
55  
56 Scientist by the Department of Family and Community Medicine (DFCM) at the University of  
57  
58  
59

1  
2  
3 Toronto and at St. Michael's Hospital. Funds from the Fidani Chair supported Dr. Agarwal as  
4  
5 the Patient Experience Measurement Lead for the DFCM.  
6  
7

8 **Data sharing statement:** Data are available upon reasonable request by emailing  
9

10  
11 [DFCM.quality@utoronto.ca](mailto:DFCM.quality@utoronto.ca).  
12  
13

14  
15 **Ethics approval statement:** The initiative was formally reviewed through the ReQUIST (Review  
16  
17 of Quality Improvement Studies) process at Unity Health Toronto, which is overseen by the  
18  
19 Vice-President, Care Experience and Equity and the Vice-President, Quality and Chief  
20  
21 Information Officer. The study was deemed to neither require Research Ethics Board approval  
22  
23  
24  
25  
26  
27  
28 nor written informed consent from participants (i.e. the need for ethical approval was waived).  
29  
30  
31  
32  
33  
34  
35  
36  
37  
38  
39  
40  
41  
42  
43  
44  
45  
46  
47  
48  
49  
50  
51  
52  
53  
54  
55  
56  
57  
58  
59  
60

## REFERENCES

1. Lemire F, Slade S. Reflections on family practice and the pandemic first wave. *Can Fam Physician*. 2020;66(6):468.
2. Stamenova V, Agarwal P, Kelley L, et al. Uptake and patient and provider communication modality preferences of virtual visits in primary care: a retrospective cohort study in Canada. *BMJ Open* 2020;10:e037064. doi:10.1136/bmjopen-2020-037064
3. Perry AF, Federico F, Huebner J. Telemedicine: Ensuring Safe, Equitable, Person-Centered Virtual Care. IHI White Paper. Boston: Institute for Healthcare Improvement; 2021. (Available at [www.ihio.org](http://www.ihio.org))
4. Herzer KR, Pronovost PJ. Ensuring Quality in the Era of Virtual Care. *JAMA*. 2021;325(5):429–430. doi:10.1001/jama.2020.24955
5. Bhatia RS, Shojania KG, Levinson W. Cost of contact: redesigning healthcare in the age of COVID. *BMJ Quality & Safety* 2021;30:236-239.

- 1  
2  
3  
4 6. Glazier RH, Green ME, Wu FC, Frymire E, Kopp A, Kiran T. Shifts in office and virtual  
5  
6  
7 primary care during the early COVID-19 pandemic in Ontario, Canada. *CMAJ*.  
8  
9  
10 2021;193(6):E200-E210. doi:10.1503/cmaj.202303  
11  
12  
13  
14 7. Philip K, Cumella A, Farrington-Douglas J, Laffan M, Hopkinson N. Respiratory patient  
15  
16  
17 experience of measures to reduce risk of COVID-19: findings from a descriptive cross-  
18  
19  
20 sectional UK wide survey. *BMJ Open*. 2020;10(9):e040951. doi:[10.1136/bmjopen-2020-](https://doi.org/10.1136/bmjopen-2020-040951)  
21  
22  
23 [040951](https://doi.org/10.1136/bmjopen-2020-040951)  
24  
25  
26  
27 8. Krist AH, DeVoe JE, Cheng A, Ehrlich T, Jones SM. Redesigning Primary Care to  
28  
29  
30 Address the COVID-19 Pandemic in the Midst of the Pandemic. *Ann Fam Med*.  
31  
32  
33 2020;18(4):349-354. doi:[10.1370/afm.2557](https://doi.org/10.1370/afm.2557)  
34  
35  
36  
37 9. Bhatia RS, Jamieson T, Shaw J, Piovesan C, Kelley LT, Falk W. Canada's virtual care  
38  
39  
40 revolution: A framework for success. *Commentary - C.D.Howe Institute*.  
41  
42  
43 2020(586):0\_1,0\_2,1-20. [https://www.proquest.com/scholarly-journals/canadas-virtual-](https://www.proquest.com/scholarly-journals/canadas-virtual-care-revolution-framework-success/docview/2480820454/se-2?accountid=201395)  
44  
45  
46  
47 [care-revolution-framework-success/docview/2480820454/se-2?accountid=201395](https://www.proquest.com/scholarly-journals/canadas-virtual-care-revolution-framework-success/docview/2480820454/se-2?accountid=201395)  
48  
49  
50  
51  
52  
53  
54  
55  
56  
57  
58  
59  
60

- 1  
2  
3  
4 10. Zulman DM, Verghese A. Virtual Care, Telemedicine Visits, and Real Connection in the  
5  
6  
7 Era of COVID-19: Unforeseen Opportunity in the Face of Adversity. *JAMA*.  
8  
9  
10 2021;325(5):437-438. doi:[10.1001/jama.2020.27304](https://doi.org/10.1001/jama.2020.27304)  
11  
12  
13  
14 11. Herzer KR, Pronovost PJ. Ensuring Quality in the Era of Virtual Care. *JAMA*.  
15  
16  
17 2021;325(5):429-430. doi:[10.1001/jama.2020.24955](https://doi.org/10.1001/jama.2020.24955)  
18  
19  
20 12. Appireddy R, Jalini S, Shukla G, Boissé Lomax L. Tackling the Burden of Neurological  
21  
22  
23 Diseases in Canada with Virtual Care During the COVID-19 Pandemic and Beyond. *Can*  
24  
25  
26  
27 *J Neurol Sci*. 2020;47(5):594-597. doi:[10.1017/cjn.2020.92](https://doi.org/10.1017/cjn.2020.92)  
28  
29  
30 13. Rashid M. Virtual Inequity: Do virtual visits risk leaving some people behind? *Can Fam*  
31  
32  
33  
34 *Physician*. 2020. Available at: <https://www.cfp.ca/news/2020/09/25/09-25>  
35  
36  
37 14. Das LT, Gonzalez CJ. Preparing Telemedicine for the Frontlines of Healthcare Equity. *J*  
38  
39  
40 *GEN INTERN MED*. 2020;35(8):2443-2444. doi:[10.1007/s11606-020-05941-9](https://doi.org/10.1007/s11606-020-05941-9)  
41  
42  
43  
44 15. Fujioka JK, Budhwani S, Thomas-Jacques T, et al. Challenges and Strategies for  
45  
46  
47 Promoting Health Equity in Virtual Care: Protocol for a Scoping Review of Reviews.  
48  
49  
50  
51 *JMIR Res Protoc*. 2020;9(12):e22847. doi:[10.2196/22847](https://doi.org/10.2196/22847)  
52  
53  
54  
55  
56  
57  
58  
59  
60

- 1  
2  
3  
4 16. Peretz PJ, Islam N, Matiz LA. Community Health Workers and Covid-19 — Addressing  
5  
6  
7 Social Determinants of Health in Times of Crisis and Beyond. *N Engl J Med*.  
8  
9  
10 2020;383(19):e108. doi:[10.1056/NEJMp2022641](https://doi.org/10.1056/NEJMp2022641)  
11  
12  
13  
14 17. Chan S, O’Riordan A, Appireddy R. Exploring the Determinants and Experiences of  
15  
16  
17 Senior Stroke Patients with Virtual Care. *Can J Neurol Sci*. 2021;48(1):87-93.  
18  
19  
20 doi:[10.1017/cjn.2020.162](https://doi.org/10.1017/cjn.2020.162)  
21  
22  
23  
24 18. Scheerder A, van Deursen A, van Dijk J. Determinants of Internet skills, uses and  
25  
26  
27 outcomes. A systematic review of the second- and third-level digital divide. *Telematics*  
28  
29  
30 *and Informatics*. 2017;34(8):1607-1624. doi:[10.1016/j.tele.2017.07.007](https://doi.org/10.1016/j.tele.2017.07.007)  
31  
32  
33  
34 19. Velasquez D, Mehrotra A. Ensuring the Growth of Telehealth During COVID-19 Does  
35  
36  
37 Not Exacerbate Disparities in Care. *Health Affairs Blog*. 2020. doi:  
38  
39  
40 [10.1377/hblog20200505.591306](https://doi.org/10.1377/hblog20200505.591306)  
41  
42  
43  
44 20. Tang E, Li MK, Mauti ER, Masi R, Goldberg R. “Doctor Zoom will see you now”: An  
45  
46  
47 equity-focused perspective on virtual care in the era of COVID-19. *University of Toronto*  
48  
49  
50 *Medical Journal*. 2021;98(2):4. Available at:  
51  
52  
53  
54 <https://utmj.org/index.php/UTMJ/article/view/1424/1306>  
55  
56  
57  
58  
59  
60



- 1  
2  
3  
4 21. Khairat S, Pillai M, Edson B, Gianforcaro R. Evaluating the Telehealth Experience of  
5  
6  
7 Patients With COVID-19 Symptoms: Recommendations on Best Practices. *Journal of*  
8  
9  
10 *Patient Experience*. 2020;7(5):665-672. doi:[10.1177/2374373520952975](https://doi.org/10.1177/2374373520952975)  
11  
12  
13  
14 22. Sirotich E, Dillingham S, Grainger R, et al. Capturing Patient-Reported Outcomes During  
15  
16  
17 the COVID-19 Pandemic: Development of the COVID-19 Global Rheumatology  
18  
19  
20 Alliance Patient Experience Survey. *Arthritis Care Res*. 2020;72(7):871-873.  
21  
22  
23 doi:[10.1002/acr.24257](https://doi.org/10.1002/acr.24257)  
24  
25  
26  
27 23. Garrido-Cumbrera M, Marzo-Ortega H, Christen L, et al. Assessment of impact of the  
28  
29  
30 COVID-19 pandemic from the perspective of patients with rheumatic and  
31  
32  
33  
34 musculoskeletal diseases in Europe: results from the REUMAVID study (phase 1). *RMD*  
35  
36  
37 *Open*. 2021;7(1):e001546. doi:[10.1136/rmdopen-2020-001546](https://doi.org/10.1136/rmdopen-2020-001546)  
38  
39  
40  
41 24. Silvera GA, Wolf JA, Stanowski A, Studer Q. The influence of COVID-19 visitation  
42  
43  
44 restrictions on patient experience and safety outcomes: A critical role for subjective  
45  
46  
47  
48 advocates. *Patient Experience Journal*. 2021;8(1):30-39. doi:[10.35680/2372-0247.1596](https://doi.org/10.35680/2372-0247.1596)  
49  
50  
51  
52  
53  
54  
55  
56  
57  
58  
59  
60

- 1  
2  
3  
4 25. Bains J, Greenwald PW, Mulcare MR, et al. Utilizing Telemedicine in a Novel Approach  
5  
6  
7 to COVID-19 Management and Patient Experience in the Emergency Department.  
8  
9  
10 *Telemedicine and e-Health*. 2021;27(3):254-260. doi:[10.1089/tmj.2020.0162](https://doi.org/10.1089/tmj.2020.0162)  
11  
12  
13  
14 26. Ryan A. How multicultural is Toronto? Let us count the  
15  
16  
17 ways...[https://torontoglobal.ca/TG-Blog/March-2019/How-multicultural-is-Toronto-Let-](https://torontoglobal.ca/TG-Blog/March-2019/How-multicultural-is-Toronto-Let-us-count-the-way)  
18  
19  
20 [us-count-the-way](https://torontoglobal.ca/TG-Blog/March-2019/How-multicultural-is-Toronto-Let-us-count-the-way). Published March 22, 2019.  
21  
22  
23  
24 27. World Population Review. Toronto Population 2016.  
25  
26  
27 <https://worldpopulationreview.com/canadian-cities/toronto-population>  
28  
29  
30 28. City of Toronto. COVID-19: Case Counts. [https://www.toronto.ca/home/covid-19/covid-](https://www.toronto.ca/home/covid-19/covid-19-pandemic-data/covid-19-weekday-status-of-cases-data/)  
31  
32  
33 [19-pandemic-data/covid-19-weekday-status-of-cases-data/](https://www.toronto.ca/home/covid-19/covid-19-pandemic-data/covid-19-weekday-status-of-cases-data/)  
34  
35  
36  
37 29. CIHI. Commonwealth Fund survey, 2019. [https://www.cihi.ca/en/commonwealth-fund-](https://www.cihi.ca/en/commonwealth-fund-survey-2019)  
38  
39  
40 [survey-2019](https://www.cihi.ca/en/commonwealth-fund-survey-2019)  
41  
42  
43  
44 30. Commonwealth Fund. 2019 Commonwealth Fund International Health Policy Survey of  
45  
46  
47 Primary Care Physicians.  
48  
49  
50 [https://www.commonwealthfund.org/publications/surveys/2019/dec/2019-](https://www.commonwealthfund.org/publications/surveys/2019/dec/2019-commonwealth-fund-international-health-policy-survey-primary)  
51  
52  
53 [commonwealth-fund-international-health-policy-survey-primary](https://www.commonwealthfund.org/publications/surveys/2019/dec/2019-commonwealth-fund-international-health-policy-survey-primary)  
54  
55  
56  
57  
58  
59  
60

- 1  
2  
3  
4 31. Hutchison B, Haj-Ali W, Dobell G, Yeritsyan N, Degani N, Gushue S. Prioritizing and  
5  
6  
7 Implementing Primary Care Performance Measures for Ontario. *Healthc Policy*.  
8  
9  
10 2020;16(1):43-57. doi:[10.12927/hcpol.2020.26291](https://doi.org/10.12927/hcpol.2020.26291)  
11  
12  
13  
14 32. Health Quality Ontario. Primary Care Patient Experience Survey: Support Guide. 2015.  
15  
16  
17 <http://www.hqontario.ca/Portals/0/documents/qi/primary-care/primary-care-patient->  
18  
19  
20 [experience-survey-support-guide-en.pdf](http://www.hqontario.ca/Portals/0/documents/qi/primary-care/primary-care-patient-)  
21  
22  
23  
24 33. Park J, Erikson C, Han X, Iyer P. Are State Telehealth Policies Associated With The Use  
25  
26  
27 Of Telehealth Services Among Underserved Populations? *Health Affairs*.  
28  
29  
30 2018;37(12):2060-2068. doi:[10.1377/hlthaff.2018.05101](https://doi.org/10.1377/hlthaff.2018.05101)  
31  
32  
33  
34 34. Nouri S, Khoong E, Lyles C, Karliner L. Addressing Equity in Telemedicine for Chronic  
35  
36  
37 Disease Management During the Covid-19 Pandemic. *NEJM Catalyst Innovations in*  
38  
39  
40 *Care Delivery*. 2020. <https://catalyst.nejm.org/doi/full/10.1056/CAT.20.0123>  
41  
42  
43  
44 35. Mehrotra A, Ray K, Brockmeyer DM, Barnett ML, Bender JA. Rapidly Converting to  
45  
46  
47 “Virtual Practices”: Outpatient Care in the Era of Covid-19. *NEJM Catalyst Innovations*  
48  
49  
50 *in Care Delivery*. 2020. <https://catalyst.nejm.org/doi/full/10.1056/CAT.20.0091>  
51  
52  
53  
54  
55  
56  
57  
58  
59  
60

- 1  
2  
3  
4 36. Bhatia RS, Chu C, Pang A, Tadrus M, Stamenova V, Cram P. Virtual care use before  
5  
6  
7 and during the COVID-19 pandemic: a repeated cross-sectional study. *CMAJ Open*.  
8  
9  
10 2021;9(1):E107-E114. doi:10.9778/cmajo.20200311  
11  
12  
13  
14 37. Weiss D, Rydland HT, Øversveen E, Jensen MR, Solhaug S, Krokstad S. Innovative  
15  
16  
17 technologies and social inequalities in health: A scoping review of the literature. Virgili  
18  
19  
20 G, ed. *PLoS ONE*. 2018;13(4):e0195447. doi:[10.1371/journal.pone.0195447](https://doi.org/10.1371/journal.pone.0195447)  
21  
22  
23  
24  
25  
26  
27  
28  
29  
30  
31  
32  
33  
34  
35  
36  
37  
38  
39  
40  
41  
42  
43  
44  
45  
46  
47  
48  
49  
50  
51  
52  
53  
54  
55  
56  
57  
58  
59  
60

**Table 1.** Demographic characteristics of survey respondents (n=7482)

| Demographic characteristic               | Survey respondents<br>n (%) |
|------------------------------------------|-----------------------------|
| <b>Age (n=6744)</b>                      |                             |
| 0 to 5 years old                         | 169 (2.51%)                 |
| 6 to 17 years old                        | 166 (2.46%)                 |
| 18 to 24 years old                       | 120 (1.78%)                 |
| 25 to 34 years old                       | 520 (7.71%)                 |
| 35 to 49 years old                       | 1412 (20.94%)               |
| 50 to 64 years old                       | 2002 (29.69%)               |
| 65 to 79 years old                       | 1921 (28.48%)               |
| 80 years or older                        | 434 (6.44%)                 |
| <b>Gender (n=6713)</b>                   |                             |
| Woman                                    | 4379 (65.23%)               |
| Man                                      | 2221 (33.09%)               |
| Other                                    | 60 (0.89%)                  |
| Prefer not to answer                     | 53 (0.79%)                  |
| <b>Education level (n=6588)</b>          |                             |
| Highschool or less                       | 1429 (21.69%)               |
| College/University                       | 3198 (48.54%)               |
| Graduate/Professional                    | 1961 (29.77%)               |
| <b>Trouble making ends meet (n=6556)</b> |                             |
| Yes                                      | 590 (9.00%)                 |

|                                         |                                 |               |
|-----------------------------------------|---------------------------------|---------------|
|                                         | No                              | 5201 (79.33%) |
|                                         | Don't know/Prefer not to answer | 765 (11.67%)  |
| <b>Born in Canada (n=6656)</b>          |                                 |               |
|                                         | Yes                             | 4728 (71.03%) |
|                                         | No                              | 1928 (28.97%) |
| <b>Arrive in last 10 years (n=1856)</b> |                                 |               |
|                                         | Yes                             | 326 (17.56%)  |
|                                         | No                              | 1530 (82.44%) |
| <b>Preferred language (n=6678)</b>      |                                 |               |
|                                         | English                         | 6576 (98.47%) |
|                                         | Non-English                     | 102 (1.53%)   |
| <b>Self-rated health (n=6665)</b>       |                                 |               |
|                                         | Excellent                       | 1002 (15.03%) |
|                                         | Very good                       | 2599 (38.99%) |
|                                         | Good                            | 2086 (31.30%) |
|                                         | Fair/Poor                       | 978 (14.67%)  |
| <b>Usual PCP (n=6545)</b>               |                                 |               |
|                                         | Staff physician                 | 4842 (73.98%) |
|                                         | Resident physician              | 1217 (18.59%) |
|                                         | Nurse practitioner              | 173 (2.64%)   |
|                                         | Unsure                          | 313 (4.78%)   |

\*Created by the authors.

**Table 2.** Proportion of respondents who received care at their primary care practice who reported that they delayed seeking care because of the pandemic, by sociodemographic characteristic

| <b>Demographics</b>             | <b>Delayed Care<br/>n (%)</b> | <b>P-value</b> |
|---------------------------------|-------------------------------|----------------|
| <b>All</b>                      | 1509 (30.53%)                 |                |
| <b>Age</b>                      |                               |                |
| <18 years old                   | 61 (29.90%)                   | <0.01          |
| 18-34 years old                 | 158 (35.03%)                  |                |
| 35-64 years old                 | 704 (31.44%)                  |                |
| 65+ years old                   | 429 (26.85%)                  |                |
| <b>Gender</b>                   |                               |                |
| Woman                           | 932 (31.65%)                  | <0.001         |
| Man                             | 376 (26.07%)                  |                |
| Other                           | 20 (42.55%)                   |                |
| Prefer not to answer            | 18 (46.15%)                   |                |
| <b>Education</b>                |                               |                |
| High school or less             | 238 (24.74%)                  | <0.001         |
| College/University              | 637 (30.09%)                  |                |
| Graduate/Professional           | 443 (33.95%)                  |                |
| <b>Trouble making ends meet</b> |                               |                |
| Yes                             | 188 (42.63%)                  | <0.001         |
| No                              | 928 (27.33%)                  |                |
| Don't know/Prefer not to answer | 196 (37.69%)                  |                |

|                            |                    |               |        |
|----------------------------|--------------------|---------------|--------|
| <b>Born in Canada</b>      |                    |               |        |
|                            | Yes                | 966 (30.92%)  | 0.07   |
|                            | No                 | 366 (28.09%)  |        |
| <b>Arrive &lt;10 years</b> |                    |               |        |
|                            | Yes                | 66 (29.33%)   | 0.79   |
|                            | No                 | 289 (28.20%)  |        |
| <b>Preferred Language</b>  |                    |               |        |
|                            | English            | 1322 (30.20%) | 0.49   |
|                            | Non-English        | 24 (34.78%)   |        |
| <b>Self-rated health</b>   |                    |               |        |
|                            | Excellent          | 153 (25.54%)  | <0.001 |
|                            | Very good          | 475 (28.84%)  |        |
|                            | Good               | 433 (30.20%)  |        |
|                            | Fair/Poor          | 275 (36.57%)  |        |
| <b>Usual PCP</b>           |                    |               |        |
|                            | Staff physician    | 976 (30.13%)  | 0.47   |
|                            | Resident physician | 246 (29.85%)  |        |
|                            | Nurse practitioner | 45 (36.59%)   |        |
|                            | Unsure             | 52 (29.21%)   |        |

\*Created by the authors.



**Table 3.** Percentage of patients who reported receiving care by phone and in person during the pandemic, by sociodemographic characteristic

| <b>Demographics</b>             | <b>In person care<br/>n (%)</b> | <b>P-value</b> | <b>Phone care<br/>n (%)</b> | <b>P-value</b> |
|---------------------------------|---------------------------------|----------------|-----------------------------|----------------|
| <b>All</b>                      | 1553 (30.64%)                   |                | 4195(82.77%)                |                |
| <b>Age</b>                      |                                 |                |                             |                |
| <18 years old                   | 102 (50.00%)                    | <0.001         | 143 (70.10%)                | <0.001         |
| 18-34 years old                 | 181 (40.13%)                    |                | 404 (89.58%)                |                |
| 35-64 years old                 | 603 (26.93%)                    |                | 1922 (85.84%)               |                |
| 65+ years old                   | 476 (29.79%)                    |                | 1338 (83.73%)               |                |
| <b>Gender</b>                   |                                 |                |                             |                |
| Woman                           | 882 (29.95%)                    | 0.57           | 2559 (86.89%)               | <0.001         |
| Man                             | 443 (30.72%)                    |                | 1163 (80.65%)               |                |
| Other                           | 17 (36.17%)                     |                | 41 (87.23%)                 |                |
| Prefer not to answer            | 9 (23.08%)                      |                | 33 (84.62%)                 |                |
| <b>Education Level</b>          |                                 |                |                             |                |
| High school or less             | 303 (31.50%)                    | 0.42           | 787 (81.81%)                | <0.05          |
| College/University              | 618 (29.19%)                    |                | 1818 (85.88%)               |                |
| Graduate/Professional           | 396 (30.34%)                    |                | 1109 (84.98%)               |                |
| <b>Trouble making ends meet</b> |                                 |                |                             |                |
| Yes                             | 122 (27.66%)                    | 0.28           | 396 (89.80%)                | <0.001         |
| No                              | 1047 (30.83%)                   |                | 2840 (83.63%)               |                |
| <b>Born in Canada</b>           |                                 |                |                             |                |

|                             |                    |               |        |               |        |
|-----------------------------|--------------------|---------------|--------|---------------|--------|
|                             | Yes                | 977 (31.27%)  | <0.05  | 2630 (84.19%) | 0.13   |
|                             | No                 | 363 (27.86%)  |        | 1121 (86.03%) |        |
| <b>Arrive &lt;10 years</b>  |                    |               |        |               |        |
|                             | Yes                | 77 (34.22%)   | <0.05  | 196 (87.11%)  | 0.73   |
|                             | No                 | 276 (26.93%)  |        | 881 (85.95%)  |        |
| <b>Preferred language</b>   |                    |               |        |               |        |
|                             | English            | 1326 (30.29%) | 0.88   | 3706 (84.67%) | 1.00   |
|                             | Non-English        | 22 (31.88%)   |        | 58 (84.06%)   |        |
| <b>Self-Reported Health</b> |                    |               |        |               |        |
|                             | Excellent          | 221 (36.89%)  | <0.001 | 470 (78.46%)  | <0.001 |
|                             | Very good          | 522 (31.69%)  |        | 1390 (84.40%) |        |
|                             | Good               | 383 (26.71%)  |        | 1222 (85.22%) |        |
|                             | Fair/Poor          | 220 (29.26%)  |        | 673 (89.49%)  |        |
| <b>Usual PCP</b>            |                    |               |        |               |        |
|                             | Staff physician    | 963 (29.73%)  | 0.10   | 2750 (84.90%) | 0.22   |
|                             | Resident physician | 270 (32.77%)  |        | 701 (85.07%)  |        |
|                             | Nurse practitioner | 46 (37.40%)   |        | 97 (78.86%)   |        |
|                             | Unsure             | 50 (28.09%)   |        | 146 (82.02%)  |        |

\*Created by the authors.

**Table 4.** Percentage of patients who reported they were comfortable with the privacy and security of using phone, video and email or secure messaging to receive care during the pandemic, by sociodemographic characteristic

| Demographics                    | Phone<br>n (%) | P-value | Video<br>n (%) | P-value | Email<br>Messaging<br>n (%) | P-value |
|---------------------------------|----------------|---------|----------------|---------|-----------------------------|---------|
| <b>All</b>                      | 3824 (92.39%)  |         | 238 (95.20%)   |         | 794 (91.26%)                |         |
| <b>Age</b>                      |                |         |                |         |                             |         |
| <18 years old                   | 138 (96.50%)   | <0.05   | 19 (95.00%)    | 0.60    | 17 (94.44%)                 | 0.43    |
| 18-34 years old                 | 371 (91.83%)   |         | 28 (93.33%)    |         | 90 (87.38%)                 |         |
| 35-64 years old                 | 1800 (93.65%)  |         | 104 (94.55%)   |         | 383 (90.54%)                |         |
| 65+ years old                   | 1223 (91.41%)  |         | 63 (98.44%)    |         | 249 (92.57%)                |         |
| <b>Gender</b>                   |                |         |                |         |                             |         |
| Woman                           | 2385 (93.20%)  | <0.001  | 128 (96.97%)   | 0.17    | 501 (90.60%)                | <0.001  |
| Man                             | 1077 (92.61%)  |         | 75 (94.94%)    |         | 219 (92.80%)                |         |
| Other                           | 40 (97.56%)    |         | 4 (80.00%)     |         | 15 (100.00%)                |         |
| Prefer not to answer            | 24 (72.73%)    |         | 6 (85.71%)     |         | 2 (40.00%)                  |         |
| <b>Education Level</b>          |                |         |                |         |                             |         |
| High school or less             | 743 (94.41%)   | 0.17    | 47 (92.16%)    | 0.20    | 121 (93.08%)                | 0.65    |
| College/University              | 1679 (92.35%)  |         | 94 (97.92%)    |         | 358 (90.63%)                |         |
| Graduate/Professional           | 1032 (93.06%)  |         | 66 (92.96%)    |         | 250 (91.91%)                |         |
| <b>Trouble making ends meet</b> |                |         |                |         |                             |         |
| Yes                             | 354 (89.39%)   | <0.001  | 24 (92.31%)    | 0.63    | 70 (85.37%)                 | <0.001  |

|                                    |               |        |              |      |              |       |
|------------------------------------|---------------|--------|--------------|------|--------------|-------|
| No                                 | 2679 (94.33%) |        | 153 (96.23%) |      | 576 (93.96%) |       |
| I don't know/Prefer not to answer  | 400 (87.53%)  |        | 30 (96.77%)  |      | 75 (78.12%)  |       |
| <b>Born in Canada</b>              |               |        |              |      |              |       |
| Yes                                | 2471 (93.95%) | <0.001 | 159 (95.78%) | 1.00 | 526 (92.93%) | <0.05 |
| No                                 | 1019 (90.90%) |        | 54 (94.74%)  |      | 204 (87.18%) |       |
| <b>Arrive in the last 10 years</b> |               |        |              |      |              |       |
| Yes                                | 176 (89.80%)  | 0.80   | 7 (100.00%)  | 1.00 | 34 (82.93%)  | 0.52  |
| No                                 | 799 (90.69%)  |        | 45 (93.75%)  |      | 163 (88.11%) |       |
| <b>Preferred language</b>          |               |        |              |      |              |       |
| English                            | 3440 (92.82%) | 0.50   | 209 (95.43%) | 0.48 | 727 (91.33%) | 0.40  |
| Non-English                        | 52 (89.66%)   |        | 3 (75.00%)   |      | 7 (77.78%)   |       |
| <b>Self-Reported Health</b>        |               |        |              |      |              |       |
| Excellent                          | 455 (96.81%)  | <0.001 | 30 (93.75%)  | 0.98 | 105 (95.45%) | <0.05 |
| Very good                          | 1324 (95.25%) |        | 65 (95.59%)  |      | 259 (93.50%) |       |
| Good                               | 1131 (92.55%) |        | 72 (94.74%)  |      | 235 (90.04%) |       |
| Fair/Poor                          | 579 (86.03%)  |        | 42 (95.45%)  |      | 133 (85.81%) |       |
| <b>Usual PCP</b>                   |               |        |              |      |              |       |
| Staff physician                    | 2575 (93.64%) | <0.05  | 164 (96.47%) | 0.17 | 568 (92.21%) | 0.07  |
| Resident physician                 | 640 (91.30%)  |        | 28 (87.50%)  |      | 107 (87.70%) |       |
| Nurse practitioner                 | 86 (88.66%)   |        | 4 (100.00%)  |      | 17 (89.47%)  |       |
| Unsure                             | 130 (89.04%)  |        | 11 (91.67%)  |      | 24 (80.00%)  |       |

\*Created by the authors.

1  
2  
3  
4  
5  
6  
7  
8  
9  
10  
11  
12  
13  
14  
15  
16  
17  
18  
19  
20  
21  
22  
23  
24  
25  
26  
27  
28  
29  
30  
31  
32  
33  
34  
35  
36  
37  
38  
39  
40  
41  
42  
43  
44  
45  
46  
47

For peer review only

**Table 5.** Preferences for ongoing uses of virtual care options after the pandemic, by sociodemographic characteristic

| Demographics                      | Phone<br>n (%) | P-value | Video<br>n (%) | P-value | Email<br>Messaging<br>n (%) | P-value |
|-----------------------------------|----------------|---------|----------------|---------|-----------------------------|---------|
| <b>All</b>                        | 3798 (74.94%)  |         | 2172 (42.86%)  |         | 2644 (52.17%)               |         |
| <b>Age</b>                        |                |         |                |         |                             |         |
| <18 years old                     | 171 (83.82%)   | <0.05   | 120 (58.82%)   | <0.001  | 117 (57.35%)                | <0.001  |
| 18-34 years old                   | 385 (85.37%)   |         | 252 (55.88%)   |         | 292 (64.75%)                |         |
| 35-64 years old                   | 1886 (84.23%)  |         | 1206 (53.86%)  |         | 1352 (60.38%)               |         |
| 65+ years old                     | 1291 (80.79%)  |         | 549 (34.36%)   |         | 834 (52.19%)                |         |
| <b>Gender</b>                     |                |         |                |         |                             |         |
| Woman                             | 2510 (85.23%)  | <0.001  | 1418 (48.15%)  | 0.45    | 1758 (59.69%)               | <0.01   |
| Man                               | 1142 (79.20%)  |         | 662 (45.91%)   |         | 780 (54.09%)                |         |
| Other                             | 37 (78.72%)    |         | 23 (48.94%)    |         | 31 (65.96%)                 |         |
| Prefer not to answer              | 29 (74.36%)    |         | 21 (53.85%)    |         | 20 (51.28%)                 |         |
| <b>Education Level</b>            |                |         |                |         |                             |         |
| High school or less               | 770 (80.04%)   | <0.05   | 384 (39.92%)   | <0.001  | 468 (48.65%)                | <0.001  |
| College/University                | 1777 (83.94%)  |         | 993 (46.91%)   |         | 1227 (57.96%)               |         |
| Graduate/Professional             | 1098 (84.14%)  |         | 705 (54.02%)   |         | 846 (64.83%)                |         |
| <b>Trouble making ends meet</b>   |                |         |                |         |                             |         |
| Yes                               | 362 (82.09%)   | <0.001  | 195 (44.22%)   | <0.001  | 257 (58.28%)                | <0.001  |
| No                                | 2869 (84.48%)  |         | 1665 (49.03%)  |         | 2037 (59.98%)               |         |
| I don't know/Prefer not to answer | 387 (74.42%)   |         | 204 (39.23%)   |         | 232 (44.62%)                |         |

|                                    |               |        |               |        |               |        |  |
|------------------------------------|---------------|--------|---------------|--------|---------------|--------|--|
| <b>Born in Canada</b>              |               |        |               |        |               |        |  |
| Yes                                | 2687 (86.01%) | <0.001 | 1579 (50.54%) | <0.001 | 1890 (60.50%) | <0.001 |  |
| No                                 | 1005 (77.13%) |        | 527 (40.45%)  |        | 683 (52.42%)  |        |  |
| <b>Arrive in the last 10 years</b> |               |        |               |        |               |        |  |
| Yes                                | 166 (73.78%)  | 0.13   | 89 (39.56%)   | 0.90   | 101 (44.89%)  | <0.05  |  |
| No                                 | 806 (78.63%)  |        | 413 (40.29%)  |        | 554 (54.05%)  |        |  |
| <b>Preferred language</b>          |               |        |               |        |               |        |  |
| English                            | 3642 (83.21%) | 0.12   | 2086 (47.66%) | 0.08   | 2532 (57.85%) | <0.05  |  |
| Non-English                        | 52 (75.36%)   |        | 25 (36.23%)   |        | 29 (42.03%)   |        |  |
| <b>Self-Reported Health</b>        |               |        |               |        |               |        |  |
| Excellent                          | 519 (86.64%)  | <0.01  | 330 (55.09%)  | <0.001 | 382 (63.77%)  | <0.001 |  |
| Very good                          | 1392 (84.52%) |        | 843 (51.18%)  |        | 977 (59.32%)  |        |  |
| Good                               | 1179 (82.22%) |        | 635 (44.28%)  |        | 809 (56.42%)  |        |  |
| Fair/Poor                          | 597 (79.39%)  |        | 294 (39.10%)  |        | 394 (52.39%)  |        |  |
| <b>Usual PCP</b>                   |               |        |               |        |               |        |  |
| Staff physician                    | 2730 (84.29%) | <0.001 | 1613 (49.80%) | <0.001 | 1943 (59.99%) | <0.001 |  |
| Resident physician                 | 659 (79.98%)  |        | 336 (40.78%)  |        | 415 (50.36%)  |        |  |
| Nurse practitioner                 | 104 (84.55%)  |        | 55 (44.72%)   |        | 73 (59.35%)   |        |  |
| Unsure                             | 133 (74.72%)  |        | 79 (44.38%)   |        | 92 (51.69%)   |        |  |

\*Created by the authors.

# Improving your Patient Experience

Dept of Family and Community Medicine, University of Toronto  
Draft Jun 1, 2020

---

## Start of Block: Intro Block

Q1 Dear THE CLINIC'S NAME Patient,

The CLINIC wants to know about your experience getting health care during the COVID-19 pandemic. We are asking you to complete a short survey, which will take about 5 minutes. Your answers will help us to improve the care we provide.

You are receiving this survey because either you or your family member is a patient with CLINIC and have a birthday in MONTH1, MONTH2, MONTH3. Participation is voluntary and responses are confidential. We do not ask for your name in the survey and your answers cannot be linked back to your chart. We are interested in your honest opinion, whether it is negative or positive. Your responses to this survey will not change the care you receive from us.

PLEASE NOTE: This survey is for the person in your family who has a birthday in MONTH1, MONTH2, MONTH3. If this person is someone you are a caregiver for (a child or parent), please respond based on their care experience. If your own birthday is also in MONTH 1, MONTH 2, MONTH 3, you can choose to respond based on your own care experience.

## End of Block: Intro Block

---

## Start of Block: Block 1

Q2 Section 1 – Care needs during pandemic

*The following questions will help us better understand your comfort with accessing care during the COVID-19 pandemic. Please think about the care you received after March 17, 2020 (the date Ontario declared a state of emergency due to COVID-19).*





1  
2  
3 **Q3 Did you receive care from a doctor, nurse or healthcare provider at CLINIC during the**  
4 **COVID-19 pandemic? This includes care delivered in person, by phone, by video or by**  
5 **email or secure message.**  
6

7  
8  Yes (1)  
9

10  No (2)  
11  
12

13 *Skip To: Q12 If DFCM1.1 = No*  
14



17  
18  
19 **Q4 How did you receive care during this time? (Select all that apply)**  
20

21  In person (1)  
22

23  Phone call (2)  
24

25  Video (3)  
26

27  Email or secure message (4)  
28  
29  
30  
31  
32  
33

34  
35  
36 *Display This Question:*

37 *If DFCM1.2 = Phone call*  
38



1  
2  
3 Q5 When using the PHONE to discuss your health concerns, how comfortable were you with  
4 the level of privacy and security? (Select one response)  
5  
6

- 7  Extremely comfortable (1)  
8  
9  Somewhat comfortable (2)  
10  
11  Neither comfortable nor uncomfortable (3)  
12  
13  Somewhat uncomfortable (4)  
14  
15  Extremely uncomfortable (5)  
16  
17  
18  
19

20  
21 *Display This Question:*

22 *If DFCM1.2 = Phone call*  
23



25  
26 Q6 When using the PHONE , was there anything you did not talk about because you were  
27 worried about privacy? (Select one response with optional comments)  
28  
29

- 30  Yes (1)  
31  
32  No (2)  
33  
34  Comments: (3) \_\_\_\_\_  
35  
36  
37  
38  
39

40  
41 *Display This Question:*

42 *If DFCM1.2 = Video*  
43



1  
2  
3 Q7 When using VIDEO to discuss your health concerns, how comfortable were you with the  
4 level of privacy and security? (Select one response)  
5  
6

- 7  Extremely comfortable (1)  
8  
9  Somewhat comfortable (2)  
10  
11  Neither comfortable nor uncomfortable (3)  
12  
13  Somewhat uncomfortable (4)  
14  
15  Extremely uncomfortable (5)  
16  
17  
18  
19

20  
21 *Display This Question:*

22 *If DFCM1.2 = Video*  
23



25  
26 Q8 When using VIDEO, was there anything you did not talk about because you were  
27 worried about privacy? (Select one response with optional comments)  
28  
29

- 30  Yes (1)  
31  
32  No (2)  
33  
34  Comments: (3) \_\_\_\_\_  
35  
36  
37  
38  
39

40  
41 *Display This Question:*

42 *If DFCM1.2 = Email or secure message*  
43



1  
2  
3 Q9 When using EMAIL or SECURE MESSAGE to discuss your health concerns, how  
4 comfortable were you with the level of privacy and security? (Select one response)  
5  
6

- 7  Extremely comfortable (1)  
8  
9  Somewhat comfortable (2)  
10  
11  Neither comfortable nor uncomfortable (3)  
12  
13  Somewhat uncomfortable (4)  
14  
15  Extremely uncomfortable (5)  
16  
17  
18  
19

20  
21 *Display This Question:*

22 *If DFCM1.2 = Email or secure message*  
23

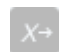

25  
26 Q10 When using EMAIL or SECURE MESSAGE, was there anything you did not talk about  
27 because you were worried about privacy? (Select one response with optional comments)  
28  
29

- 30  Yes (1)  
31  
32  No (2)  
33  
34  Comments: (3) \_\_\_\_\_  
35  
36  
37  
38  
39

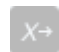

42  
43  
44 Q11 Did you avoid or delay receiving care from THE CLINIC because of the COVID-19  
45 pandemic? (Select one response)  
46  
47

- 48  Yes (1)  
49  
50  No (2)  
51  
52  
53  
54  
55  
56  
57  
58  
59  
60

1  
2  
3  
4  
5  
6  
7  
8  
9  
10  
11  
12  
13  
14  
15  
16  
17  
18  
19  
20  
21  
22  
23  
24  
25  
26  
27  
28  
29  
30  
31  
32  
33  
34  
35  
36  
37  
38  
39  
40  
41  
42  
43  
44  
45  
46  
47  
48  
49  
50  
51  
52  
53  
54  
55  
56  
57  
58  
59  
60

Display This Question:

If DFCM1.1 = No



**Q12 Please tell us why you did not get care from THE CLINIC during the COVID pandemic:** (Select all that apply)

- I did not have any health needs (1)
- I did not know I could receive care from the clinic during the pandemic (2)
- I did not want to come into the clinic because I was worried for my personal safety (3)
- I tried but could not get an appointment (4)
- The hours were inconvenient (5)
- I could not get through to the clinic on the phone (7)
- Other (please specify): (6)
- 

Display This Question:

If DFCM1.1 = No



1  
2  
3 **Q13 Did you get care somewhere else during the COVID pandemic?** (Select all that apply)  
4  
5

6   No, I did not get care elsewhere (1)  
7

8  
9  I got care from a walk-in clinic in person (2)  
10

11  
12  I got care from a walk-in clinic by phone or video (3)  
13

14  
15  I went to the emergency department (4)  
16

17  
18  Other (please specify): (5)  
19  
20  
21  
22

23 End of Block: Block 1  
24

25 Start of Block: Block 2  
26  
27

28 **Q14 Section 2: Getting URGENT CARE when you are sick during the COVID-19 pandemic**

29 *The following questions help us better understand the experience of patients who were sick*  
30 *and wanted to be seen urgently. Please answer the questions below for the time during the*  
31 *COVID-19 pandemic only (starting March 17, 2020).*  
32  
33

34 -----



37  
38  
39 **Q15 During the COVID-19 pandemic, was there a time when you were sick and**  
40 **URGENTLY needed care at THE CLINC?** (Select one response)  
41

42  Yes (1)  
43

44  No (2)  
45  
46

47  
48 Skip To: End of Block If DFCM2.1 = No  
49



52  
53 **Q16 Think about the time you needed URGENT CARE. How many days did it take from**  
54 **when you first tried to book an appointment at our clinic to when you received care?**  
55  
56  
57  
58

Care could include an in-person visit, phone visit, video visit and/or email or secure messaging. (Select one response).

- On the same day (1)
- The next day (2)
- In 2 to 3 days (3)
- In 4 to 7 days (4)
- After more than 1 week (5)
- Never able to get an appointment (6)
- Not sure (7)

Display This Question:

If DFCM2.2 = In 2 to 3 days

Or DFCM2.2 = In 4 to 7 days

And DFCM2.2 = After more than 1 week

And DFCM2.2 = Never able to get an appointment

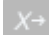

Q17 Why were you not able to get care the same or next day? (Select all that apply)

- I was informed that there was no availability (1)
- I was offered an appointment but not with the provider I preferred (2)
- I was offered an appointment but not at the time I preferred (3)
- I could not get through to the clinic on the phone (4)
- Other (Please specify) (5)
-

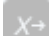

Q18 How would you describe the length of time it took between making the appointment and receiving care? (Select one response)

- About right (1)
  - Somewhat too long (2)
  - Much too long (3)
- 

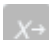

Q19 During the COVID-19 pandemic, did you need urgent care on an evening, weekend, or public holiday?

- Yes (1)
  - No (2)
- 

*Display This Question:*

*If DFCM2.5 = Yes*

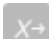

Q20 How easy or difficult was it to get urgent care from CLINIC on an evening, weekend, or holiday during the COVID-19 pandemic?

- Very easy (1)
- Somewhat easy (2)
- Neither easy nor difficult (3)
- Somewhat difficult (4)
- Very difficult (5)

**End of Block: Block 2**

---

**Start of Block: Block 3**



1  
2  
3  
4  
5  
6  
7  
8  
9  
10  
11  
12  
13  
14

**Q21 Section 3: Care experience**

*For the next set of questions, please think about your experience when receiving care from your doctor or nurse practitioner during the COVID-19 pandemic only (starting March 17, 2020). This includes care delivered in person, by phone, by video or by email or secure message.*

15  
16  
17  
18  
19  
20  
21  
22  
23  
24  
25  
26  
27  
28  
29  
30  
31  
32  
33

---



**Q22 How often did you receive care from the doctor or nurse practitioner that you prefer?**  
(select one response)

- 34  
35  
36  
37  
38  
39  
40  
41  
42  
43  
44  
45  
46  
47  
48  
49  
50  
51  
52  
53
- I do not have a preferred health care provider (1)
  - Always (2)
  - Usually (3)
  - Occasionally (4)
  - Rarely (5)
  - Never (6)
- 



**Q23 How often did you receive care within a reasonable time from your doctor or nurse practitioner?** (Select one response)

- 54  
55  
56  
57  
58  
59  
60
- Always (1)
  - Usually (2)
  - Occasionally (3)
  - Rarely (4)
  - Never (5)
- 

Page Break

1  
2  
3  
4  
5  
6  
7  
8  
9  
10  
11  
12  
13  
14  
15  
16  
17  
18  
19  
20  
21  
22  
23  
24  
25  
26  
27  
28  
29  
30  
31  
32  
33  
34  
35  
36  
37  
38  
39  
40  
41  
42  
43  
44  
45  
46  
47  
48  
49  
50  
51  
52  
53  
54  
55  
56  
57  
58  
59  
60

For peer review only



Q24 **When you received care from your doctor or nurse practitioner, how often did they involve you as much as you want to be in decisions about your care and treatment?** (Select one response)

- Always (1)
- Usually (2)
- Occasionally (3)
- Rarely (4)
- Never (5)



Q25 **When you received care from your doctor or nurse practitioner, how often did they spend enough time with you?** (Select one response)

- Always (1)
- Usually (2)
- Occasionally (3)
- Rarely (4)
- Never (5)

End of Block: Block 3

---

Start of Block: Block ADDITIONAL

Q26 Click to write the question text

End of Block: Block ADDITIONAL

---

Start of Block: Block 4

1  
2  
3 **Q27 Section 4: Your recommendations** *For the next set of questions, please share your*  
4 *thoughts on how we can improve THE CLINIC.*  
5  
6  
7



9  
10  
11 **Q28 After the COVID-19 pandemic is over, which of these care options should the clinic**  
12 **continue to offer?** (Select all that apply)  
13

- 14  Phone (1)  
15  
16  Video (2)  
17  
18  Email/secure messaging portal (3)  
19  
20  Other (4) \_\_\_\_\_  
21  
22  None of the above (5)  
23  
24  
25  
26  
27  
28  
29  
30

31  
32  
33  
34 **Q29 What changes did our clinic make during COVID-19 that you would like us to**  
35 **continue?** (Optional)  
36

37 \_\_\_\_\_  
38 \_\_\_\_\_  
39 \_\_\_\_\_  
40 \_\_\_\_\_  
41 \_\_\_\_\_  
42 \_\_\_\_\_  
43 \_\_\_\_\_  
44 \_\_\_\_\_  
45 \_\_\_\_\_  
46 \_\_\_\_\_  
47

48  
49  
50 **Q30 What do you think our clinic could have done differently to better meet your health**  
51 **needs during the COVID-19 pandemic?** (Optional)  
52

53 \_\_\_\_\_  
54 \_\_\_\_\_  
55 \_\_\_\_\_  
56 \_\_\_\_\_  
57  
58  
59  
60

1  
2  
3  
4  
5  
6  
7  
8  
9  
10  
11  
12  
13  
14  
15  
16  
17  
18  
19  
20  
21  
22  
23  
24  
25  
26  
27  
28  
29  
30  
31  
32  
33  
34  
35  
36  
37  
38  
39  
40  
41  
42  
43  
44  
45  
46  
47  
48  
49  
50  
51  
52  
53  
54  
55  
56  
57  
58  
59  
60

---

---

---



**Q31 Overall, would you recommend our clinic, to your friends and family? (Select one response)**

- Yes (1)
- No (2)

End of Block: Block 4

---

Start of Block: Block 5a



**Q32 Are you filling this survey out on behalf of someone else? (Select one response)**

- Yes (1)
- No (2)

End of Block: Block 5a

---

Start of Block: Block 5b - Family

**Q33 Section 5: About Your Family Member**

This final section of the survey helps us understand if some groups are experiencing care differently than others.



For peer review only

1  
2  
3 Q34 I am filling this survey on behalf of my child or family member who is: (optional)  
4  
5

- 6  0-5 years old (1)  
7  
8  6-17 years old (2)  
9  
10  18-24 years old (3)  
11  
12  25-34 years old (4)  
13  
14  35-49 years old (5)  
15  
16  50-64 years old (6)  
17  
18  65-79 years old (7)  
19  
20  80+ years old (8)  
21  
22  
23  
24



28  
29  
30 Q35 What gender do they identify with? (optional)  
31

- 32  Woman/girl (1)  
33  
34  Man/boy (2)  
35  
36  Transgender woman/girl (3)  
37  
38  Transgender man/boy (4)  
39  
40  Non-binary (for example gender queer, 2-spirit) (5)  
41  
42  Identity not listed (please specify) (6)  
43  
44  
45  
46  
47  
48  Prefer not to answer (7)  
49  
50

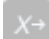

1  
2  
3 Q36 What is their highest level of education? (optional)  
4  
5

- 6  Elementary school or less (1)  
7  
8  Some High school (2)  
9  
10  High School Diploma (3)  
11  
12  College or University Diploma Degree (4)  
13  
14  Graduate or Professional Degree (5)  
15  
16  
17



21  
22 Q37 Do they have trouble making ends meet (money problems) at the end of the month?  
23 (optional)  
24

- 25  Yes (1)  
26  
27  No (2)  
28  
29  I don't know (3)  
30  
31  Prefer not to answer (4)  
32  
33  
34  
35



39  
40 Q38 Were they born in Canada? (optional)  
41

- 42  Yes (1)  
43  
44  No (2)  
45  
46  
47  
48

49 **Display This Question:**

50 *If DFCM5b.5 = No*  
51



1  
2  
3 **Q39 Did you arrive in Canada in the last 10 years?** (optional)  
4

5  Yes (1)  
6  
7

8  No (2)  
9  
10

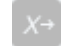

13  
14  
15 **Q40 What language would they prefer speaking with their primary care**  
16 **provider?** (optional)  
17

18  English (1)  
19

20  French (2)  
21

22  Other (please specify): (3) \_\_\_\_\_  
23  
24  
25

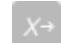

28  
29  
30 **Q41 In general, would you say their health is:** (optional)  
31

32  Excellent (1)  
33

34  Very Good (2)  
35

36  Good (3)  
37

38  Fair (4)  
39

40  Poor (5)  
41  
42  
43  
44

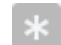

47  
48  
49 **Q42 What is their postal code?** (optional)  
50  
51  
52  
53  
54  
55  
56  
57  
58  
59  
60

\_\_\_\_\_





Q43 Which primary care provider do they usually see? (optional)

- Staff Physician (1)
- Resident Physician (2)
- Nurse Practitioner (3)
- Unsure (4)

End of Block: Block 5b - Family

---

Start of Block: Block 5c - Yourself

#### Q44 Section 5: About You

This final section of the survey helps us understand if some groups are experiencing care differently than others.



Q45 How old are you? (optional)

- 0-5 years old (1)
- 6-17 years old (2)
- 18-24 years old (3)
- 25-34 years old (4)
- 35-49 years old (5)
- 50-64 years old (6)
- 65-79 years old (7)
- 80+ years old (8)



Q46 **What gender do you identify with?** (optional)

- Woman/girl (1)
  - Man/boy (2)
  - Transgender woman/girl (3)
  - Transgender man/boy (4)
  - Non-binary (for example gender queer, 2-spirit) (5)
  - Identity not listed (please specify) (6)
- 
- Prefer not to answer (7)



Q47 **What is your highest level of education?** (optional)

- Elementary school or less (1)
- Some High school (2)
- High School Diploma (3)
- College or University Diploma Degree (4)
- Graduate or Professional Degree (5)



1  
2  
3 **Q48 Do you have trouble making ends meet (money problems) at the end of the**  
4 **month?** (optional)  
5

- 6  
7  Yes (1)  
8  
9  No (2)  
10  
11  I don't know (3)  
12  
13  Prefer not to answer (4)  
14  
15  
16
- 



17  
18  
19  
20  
21 **Q49 Were you born in Canada?** (optional)  
22

- 23  Yes (1)  
24  
25  No (2)  
26  
27  
28
- 

29  
30 *Display This Question:*

31 *If DFCM5c.5 = No*  
32



33  
34  
35  
36 **Q50 Did you arrive in Canada in the last 10 years?** (optional)  
37

- 38  Yes (1)  
39  
40  No (2)  
41  
42  
43
- 



1  
2  
3 **Q51 What language would you prefer speaking with your primary care**  
4 **provider?** (optional)  
5

6  
7  English (1)  
8

9  French (2)  
10

11  Other (please specify): (3) \_\_\_\_\_  
12  
13  
14



17  
18 **Q52 In general, would you say your health is:** (optional)  
19

20  
21  Excellent (1)  
22

23  Very Good (2)  
24

25  Good (3)  
26

27  Fair (4)  
28

29  Poor (5)  
30  
31  
32  
33



36  
37 **Q53 What is your postal code?** (optional)  
38

39 \_\_\_\_\_  
40  
41  
42  
43

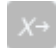

1  
2  
3  
4  
5  
6  
7  
8  
9  
10  
11  
12  
13  
14  
15  
16  
17  
18  
19  
20  
21  
22  
23  
24  
25  
26  
27  
28  
29  
30  
31  
32  
33  
34  
35  
36  
37  
38  
39  
40  
41  
42  
43  
44  
45  
46  
47  
48  
49  
50  
51  
52  
53  
54  
55  
56  
57  
58  
59  
60

Q54 Which primary care provider do you usually see? (optional)

- Staff Physician (1)
- Resident Physician (2)
- Nurse Practitioner (3)
- Unsure (4)

End of Block: Block 5c - Yourself

---

Start of Block: End of Survey

Q55 Thank you for spending the time to complete this survey. Note: Please click "Submit" to record all your answers.

End of Block: End of Survey

---

For peer review only

1  
2  
3 **SUPPLEMENTARY FILE 2: Site Demographics**  
4  
5  
6

7

| Site name                                                                  | City        | Number of surveys sent<br>(N= 32, 307) | Number of responses<br>(N=7,532) | Response Rate<br>(%) |
|----------------------------------------------------------------------------|-------------|----------------------------------------|----------------------------------|----------------------|
| <b>Barrie and Community Family Health Team</b>                             | Barrie      | 748                                    | 279                              | 37%                  |
| <b>Credit Valley Family Health Team</b>                                    | Mississauga | 2,056                                  | 645                              | 31%                  |
| <b>Health for All Family Health Team</b>                                   | Markham     | 1,900                                  | 535                              | 28%                  |
| <b>Mount Sinai Academic Family Health Team</b>                             | Toronto     | 2,100                                  | 391                              | 19%                  |
| <b>Southlake Family Health Team</b>                                        | Newmarket   | 1,968                                  | 735                              | 37%                  |
| <b>North York Family Health Team</b>                                       | North York  | 1,466                                  | 390                              | 27%                  |
| <b>Platinum Medical Family Health Organization</b>                         | Scarborough | 1,792                                  | 222                              | 12%                  |
| <b>Sunnybrook Academic Family Health Team</b>                              | Toronto     | 1,447                                  | 409                              | 28%                  |
| <b>St. Joseph's Health Centre Family Medicine/Urban Family Health Team</b> | Toronto     | 1,135                                  | 265                              | 23%                  |

8  
9  
10  
11  
12  
13  
14  
15  
16  
17  
18  
19  
20  
21  
22  
23  
24  
25  
26  
27  
28  
29  
30  
31  
32  
33  
34  
35  
36  
37  
38  
39  
40  
41  
42  
43  
44  
45  
46  
47

1  
2  
3  
4  
5  
6  
7  
8  
9  
10  
11  
12  
13  
14  
15  
16  
17  
18  
19  
20  
21  
22  
23  
24  
25  
26  
27  
28  
29  
30  
31  
32  
33  
34  
35  
36  
37  
38  
39  
40  
41  
42  
43  
44  
45  
46  
47

|                                                               |             |       |      |     |
|---------------------------------------------------------------|-------------|-------|------|-----|
| <b>St. Michael’s Hospital Academic Family Health Team</b>     | Toronto     | 5,180 | 1337 | 26% |
| <b>South East Toronto Family Health Team</b>                  | Toronto     | 5,244 | 591  | 11% |
| <b>Summerville Family Health Team</b>                         | Mississauga | 5,070 | 1426 | 28% |
| <b>Women’s College Hospital Family Practice Health Centre</b> | Toronto     | 2,201 | 307  | 14% |

\*Created by the authors.

For peer review only

### Checklist for Reporting Results of Internet E-Surveys (CHERRIES)

| <b>Checklist Item</b>            | <b>Explanation</b>                                                                                                                                                                                                                                                                                                                                                                                                                            | <b>Page Number</b> |
|----------------------------------|-----------------------------------------------------------------------------------------------------------------------------------------------------------------------------------------------------------------------------------------------------------------------------------------------------------------------------------------------------------------------------------------------------------------------------------------------|--------------------|
| Describe survey design           | Describe target population, sample frame. Is the sample a convenience sample? (In "open" surveys this is most likely.)                                                                                                                                                                                                                                                                                                                        | 5                  |
| IRB approval                     | Mention whether the study has been approved by an IRB.                                                                                                                                                                                                                                                                                                                                                                                        | 6                  |
| Informed consent                 | Describe the informed consent process. Where were the participants told the length of time of the survey, which data were stored and where and for how long, who the investigator was, and the purpose of the study?                                                                                                                                                                                                                          | 7                  |
| Data protection                  | If any personal information was collected or stored, describe what mechanisms were used to protect unauthorized access.                                                                                                                                                                                                                                                                                                                       | 7                  |
| Development and testing          | State how the survey was developed, including whether the usability and technical functionality of the electronic questionnaire had been tested before fielding the questionnaire.                                                                                                                                                                                                                                                            | 7                  |
| Open survey versus closed survey | An "open survey" is a survey open for each visitor of a site, while a closed survey is only open to a sample which the investigator knows (password-protected survey).                                                                                                                                                                                                                                                                        | 6                  |
| Contact mode                     | Indicate whether or not the initial contact with the potential participants was made on the Internet. (Investigators may also send out questionnaires by mail and allow for Web-based data entry.)                                                                                                                                                                                                                                            | 6                  |
| Advertising the survey           | How/where was the survey announced or advertised? Some examples are offline media (newspapers), or online (mailing lists – If yes, which ones?) or banner ads (Where were these banner ads posted and what did they look like?). It is important to know the wording of the announcement as it will heavily influence who chooses to participate. Ideally the survey announcement should be published as an appendix.                         | 6                  |
| Web/E-mail                       | State the type of e-survey (eg, one posted on a Web site, or one sent out through e-mail). If it is an e-mail survey, were the responses entered manually into a database, or was there an automatic method for capturing responses?                                                                                                                                                                                                          | 6                  |
| Context                          | Describe the Web site (for mailing list/newsgroup) in which the survey was posted. What is the Web site about, who is visiting it, what are visitors normally looking for? Discuss to what degree the content of the Web site could pre-select the sample or influence the results. For example, a survey about vaccination on an anti-immunization Web site will have different results from a Web survey conducted on a government Web site | n/a                |
| Mandatory/voluntary              | Was it a mandatory survey to be filled in by every visitor who wanted to enter the Web site, or was it a voluntary survey?                                                                                                                                                                                                                                                                                                                    | n/a                |
| Incentives                       | Were any incentives offered (eg, monetary, prizes, or non-monetary incentives such as an offer to provide the survey results)?                                                                                                                                                                                                                                                                                                                | n/a                |



|    |                                                                                                           |                                                                                                                                                                                                                                                                                                                                                                                                                                                                                               |     |
|----|-----------------------------------------------------------------------------------------------------------|-----------------------------------------------------------------------------------------------------------------------------------------------------------------------------------------------------------------------------------------------------------------------------------------------------------------------------------------------------------------------------------------------------------------------------------------------------------------------------------------------|-----|
| 1  | Time/Date                                                                                                 | In what timeframe were the data collected?                                                                                                                                                                                                                                                                                                                                                                                                                                                    | 6   |
| 2  | Randomization of items or questionnaires                                                                  | To prevent biases items can be randomized or alternated.                                                                                                                                                                                                                                                                                                                                                                                                                                      | n/a |
| 3  | Adaptive questioning                                                                                      | Use adaptive questioning (certain items, or only conditionally displayed based on responses to other items) to reduce number and complexity of the questions.                                                                                                                                                                                                                                                                                                                                 | n/a |
| 4  | Number of Items                                                                                           | What was the number of questionnaire items per page? The number of items is an important factor for the completion rate.                                                                                                                                                                                                                                                                                                                                                                      | 7   |
| 5  | Number of screens (pages)                                                                                 | Over how many pages was the questionnaire distributed? The number of items is an important factor for the completion rate.                                                                                                                                                                                                                                                                                                                                                                    | n/a |
| 6  | Completeness check                                                                                        | It is technically possible to do consistency or completeness checks before the questionnaire is submitted. Was this done, and if "yes", how (usually JavaScript)? An alternative is to check for completeness after the questionnaire has been submitted (and highlight mandatory items). If this has been done, it should be reported. All items should provide a non-response option such as "not applicable" or "rather not say", and selection of one response option should be enforced. | n/a |
| 7  | Review step                                                                                               | State whether respondents were able to review and change their answers (eg, through a Back button or a Review step which displays a summary of the responses and asks the respondents if they are correct).                                                                                                                                                                                                                                                                                   | 6   |
| 8  | Unique site visitor                                                                                       | If you provide view rates or participation rates, you need to define how you determined a unique visitor. There are different techniques available, based on IP addresses or cookies or both.                                                                                                                                                                                                                                                                                                 | n/a |
| 9  | View rate (Ratio of unique survey visitors/unique site visitors)                                          | Requires counting unique visitors to the first page of the survey, divided by the number of unique site visitors (not page views!). It is not unusual to have view rates of less than 0.1 % if the survey is voluntary.                                                                                                                                                                                                                                                                       | n/a |
| 10 | Participation rate (Ratio of unique visitors who agreed to participate/unique first survey page visitors) | Count the unique number of people who filled in the first survey page (or agreed to participate, for example by checking a checkbox), divided by visitors who visit the first page of the survey (or the informed consents page, if present). This can also be called "recruitment" rate.                                                                                                                                                                                                     | n/a |
| 11 | Completion rate (Ratio of users who finished the survey/users who                                         | The number of people submitting the last questionnaire page, divided by the number of people who agreed to participate (or submitted the first survey page). This is only relevant if there is a separate "informed consent" page or if the survey goes over several pages. This is a measure for attrition. Note that                                                                                                                                                                        | 8   |

|    |                                                     |                                                                                                                                                                                                                                                                                                                                                                                                                                                                                                                                                                            |     |
|----|-----------------------------------------------------|----------------------------------------------------------------------------------------------------------------------------------------------------------------------------------------------------------------------------------------------------------------------------------------------------------------------------------------------------------------------------------------------------------------------------------------------------------------------------------------------------------------------------------------------------------------------------|-----|
| 1  | agreed to participate)                              | "completion" can involve leaving questionnaire items blank. This is not a measure for how completely questionnaires were filled in. (If you need a measure for this, use the word "completeness rate".)                                                                                                                                                                                                                                                                                                                                                                    |     |
| 2  | 3                                                   | 4                                                                                                                                                                                                                                                                                                                                                                                                                                                                                                                                                                          | 5   |
| 6  | Cookies used                                        | Indicate whether cookies were used to assign a unique user identifier to each client computer. If so, mention the page on which the cookie was set and read, and how long the cookie was valid. Were duplicate entries avoided by preventing users access to the survey twice; or were duplicate database entries having the same user ID eliminated before analysis? In the latter case, which entries were kept for analysis (eg, the first entry or the most recent)?                                                                                                   | n/a |
| 7  | 8                                                   | 9                                                                                                                                                                                                                                                                                                                                                                                                                                                                                                                                                                          | 10  |
| 11 | IP check                                            | Indicate whether the IP address of the client computer was used to identify potential duplicate entries from the same user. If so, mention the period of time for which no two entries from the same IP address were allowed (eg, 24 hours). Were duplicate entries avoided by preventing users with the same IP address access to the survey twice; or were duplicate database entries having the same IP address within a given period of time eliminated before analysis? If the latter, which entries were kept for analysis (eg, the first entry or the most recent)? | n/a |
| 12 | 13                                                  | 14                                                                                                                                                                                                                                                                                                                                                                                                                                                                                                                                                                         | 15  |
| 16 | Log file analysis                                   | Indicate whether other techniques to analyze the log file for identification of multiple entries were used. If so, please describe.                                                                                                                                                                                                                                                                                                                                                                                                                                        | n/a |
| 17 | 18                                                  | 19                                                                                                                                                                                                                                                                                                                                                                                                                                                                                                                                                                         | 20  |
| 21 | Registration                                        | In "closed" (non-open) surveys, users need to login first and it is easier to prevent duplicate entries from the same user. Describe how this was done. For example, was the survey never displayed a second time once the user had filled it in, or was the username stored together with the survey results and later eliminated? If the latter, which entries were kept for analysis (eg, the first entry or the most recent)?                                                                                                                                          | n/a |
| 22 | 23                                                  | 24                                                                                                                                                                                                                                                                                                                                                                                                                                                                                                                                                                         | 25  |
| 26 | Handling of incomplete questionnaires               | Were only completed questionnaires analyzed? Were questionnaires which terminated early (where, for example, users did not go through all questionnaire pages) also analyzed?                                                                                                                                                                                                                                                                                                                                                                                              | 7   |
| 27 | 28                                                  | 29                                                                                                                                                                                                                                                                                                                                                                                                                                                                                                                                                                         | 30  |
| 31 | Questionnaires submitted with an atypical timestamp | Some investigators may measure the time people needed to fill in a questionnaire and exclude questionnaires that were submitted too soon. Specify the timeframe that was used as a cut-off point, and describe how this point was determined.                                                                                                                                                                                                                                                                                                                              | n/a |
| 32 | 33                                                  | 34                                                                                                                                                                                                                                                                                                                                                                                                                                                                                                                                                                         | 35  |
| 36 | Statistical correction                              | Indicate whether any methods such as weighting of items or propensity scores have been used to adjust for the non-representative sample; if so, please describe the methods.                                                                                                                                                                                                                                                                                                                                                                                               | n/a |
| 37 | 38                                                  | 39                                                                                                                                                                                                                                                                                                                                                                                                                                                                                                                                                                         | 40  |
| 41 | 42                                                  | 43                                                                                                                                                                                                                                                                                                                                                                                                                                                                                                                                                                         | 44  |
| 45 | 46                                                  |                                                                                                                                                                                                                                                                                                                                                                                                                                                                                                                                                                            |     |

This checklist has been modified from Eysenbach G. Improving the quality of Web surveys: the Checklist for Reporting Results of Internet E-Surveys (CHERRIES). J Med Internet Res. 2004 Sep 29;6(3):e34 [erratum in J Med Internet Res. 2012; 14(1): e8.]. Article available at <https://www.jmir.org/2004/3/e34/>; erratum available <https://www.jmir.org/2012/1/e8/>. Copyright ©Gunther Eysenbach. Originally published in the [Journal of Medical Internet Research](#), 29.9.2004 and 04.01.2012.

1  
2  
3  
4  
5  
6  
7  
8  
9  
10  
11  
12  
13  
14  
15  
16  
17  
18  
19  
20  
21  
22  
23  
24  
25  
26  
27  
28  
29  
30  
31  
32  
33  
34  
35  
36  
37  
38  
39  
40  
41  
42  
43  
44  
45  
46

This is an open-access article distributed under the terms of the Creative Commons Attribution License (<https://creativecommons.org/licenses/by/2.0/>), which permits unrestricted use, distribution, and reproduction in any medium, provided the original work, first published in the Journal of Medical Internet Research, is properly cited.

For peer review only
