# Supplementary material for: Sociodemographic differences in patient experience with primary care during COVID-19: results from a cross-sectional survey in Ontario, Canada
Source: PubMed Central journal article supplement — BMJ Open. 2022 May 9;12(5):e056868. doi: 10.1136/bmjopen-2021-056868 (PMC9086266; doi:10.1136/bmjopen-2021-056868), 2022-05-09
Supplement: bmjopen-2021-056868supp002.pdf [file bmjopen-2021-056868supp002.pdf]

**SUPPLEMENTARY FILE 2: Site Demographics**

| <b>Site name</b>                                                           | <b>City</b> | <b>Number of surveys sent<br/>(N= 32, 307)</b> | <b>Number of responses<br/>(N=7,532)</b> | <b>Response Rate<br/>(%)</b> |
|----------------------------------------------------------------------------|-------------|------------------------------------------------|------------------------------------------|------------------------------|
| <b>Barrie and Community Family Health Team</b>                             | Barrie      | 748                                            | 279                                      | 37%                          |
| <b>Credit Valley Family Health Team</b>                                    | Mississauga | 2,056                                          | 645                                      | 31%                          |
| <b>Health for All Family Health Team</b>                                   | Markham     | 1,900                                          | 535                                      | 28%                          |
| <b>Mount Sinai Academic Family Health Team</b>                             | Toronto     | 2,100                                          | 391                                      | 19%                          |
| <b>Southlake Family Health Team</b>                                        | Newmarket   | 1,968                                          | 735                                      | 37%                          |
| <b>North York Family Health Team</b>                                       | North York  | 1,466                                          | 390                                      | 27%                          |
| <b>Platinum Medical Family Health Organization</b>                         | Scarborough | 1,792                                          | 222                                      | 12%                          |
| <b>Sunnybrook Academic Family Health Team</b>                              | Toronto     | 1,447                                          | 409                                      | 28%                          |
| <b>St. Joseph's Health Centre Family Medicine/Urban Family Health Team</b> | Toronto     | 1,135                                          | 265                                      | 23%                          |

|                                                               |             |       |      |     |
|---------------------------------------------------------------|-------------|-------|------|-----|
| <b>St. Michael's Hospital Academic Family Health Team</b>     | Toronto     | 5,180 | 1337 | 26% |
| <b>South East Toronto Family Health Team</b>                  | Toronto     | 5,244 | 591  | 11% |
| <b>Summerville Family Health Team</b>                         | Mississauga | 5,070 | 1426 | 28% |
| <b>Women's College Hospital Family Practice Health Centre</b> | Toronto     | 2,201 | 307  | 14% |

\*Created by the authors.
